# Supplementary material for: Gut Microbiome Signatures in the Progression of Hepatitis B Virus-Induced Liver Disease
Source: Front Microbiol. 2022 Jun 6;13:916061. doi: 10.3389/fmicb.2022.916061 (PMC9208012; doi:10.3389/fmicb.2022.916061)
Supplement: Supplementary file 1 [file Table_1.XLSX]

## Sheet: PubMed
Table S1. The list of the literatures available in PubMed and BioProjects searched at the time of the study (June 2021), their inclusion or exclusion in the meta-analysis and the reasons for the exclusion.
PMID	Included or excluded	Title	First Author	Journal/Book	Publication Year	DOI
33685078	review articles	[Ten years of research progress in the field of non-viral liver disease]	Wang QX	Zhonghua Gan Zang Bing Za Zhi	2021	10.3760/cma.j.cn501113-20210105-00006
28297794	review articles	[Research advances in autoimmune liver diseases in 2016]	Li B	Zhonghua Gan Zang Bing Za Zhi	2017	10.3760/cma.j.issn.1007-3418.2017.02.004
34904031	review articles	Heterogeneity of non-alcoholic fatty liver disease: Implications for clinical practice and research activity	Pal P	World J Hepatol	2021	10.4254/wjh.v13.i11.1584
34630882	review articles	Probiotics in hepatology: An update	Maslennikov R	World J Hepatol	2021	10.4254/wjh.v13.i9.1154
28515843	review articles	Emerging concepts in alcoholic hepatitis	Fung P	World J Hepatol	2017	10.4254/wjh.v9.i12.567
34887642	review articles	Overview of the microbiota in the gut-liver axis in viral B and C hepatitis	Neag MA	World J Gastroenterol	2021	10.3748/wjg.v27.i43.7446
34588747	review articles	Microbiota and viral hepatitis: State of the art of a complex matter	Milosevic I	World J Gastroenterol	2021	10.3748/wjg.v27.i33.5488
32523311	review articles	Role of γδT cells in liver diseases and its relationship with intestinal microbiota	Zhou QH	World J Gastroenterol	2020	10.3748/wjg.v26.i20.2559
31832000	review articles	Examining pathogenic concepts of autoimmune hepatitis for cues to future investigations and interventions	Czaja AJ	World J Gastroenterol	2019	10.3748/wjg.v25.i45.6579
27895415	review articles	Factoring the intestinal microbiome into the pathogenesis of autoimmune hepatitis	Czaja AJ	World J Gastroenterol	2016	10.3748/wjg.v22.i42.9257
27433098	review articles	Gastrointestinal and liver infections in children undergoing antineoplastic chemotherapy in the years 2000	Castagnola E	World J Gastroenterol	2016	10.3748/wjg.v22.i25.5853
27099434	review articles	New treatment options for alcoholic hepatitis	Shasthry SM	World J Gastroenterol	2016	10.3748/wjg.v22.i15.3892
26819512	review articles	Gut epithelial barrier dysfunction in human immunodeficiency virus-hepatitis C virus coinfected patients: Influence on innate and acquired immunity	Márquez M	World J Gastroenterol	2016	10.3748/wjg.v22.i4.1433
26755860	review articles	Metabolic derivatives of alcohol and the molecular culprits of fibro-hepatocarcinogenesis: Allies or enemies?	Boye A	World J Gastroenterol	2016	10.3748/wjg.v22.i1.50
25469014	review articles	Non alcoholic steatohepatitis a precursor for hepatocellular carcinoma development	Jiang CM	World J Gastroenterol	2014	10.3748/wjg.v20.i44.16464
25278690	review articles	Hepatocellular carcinoma in nonalcoholic fatty liver: role of environmental and genetic factors	Dongiovanni P	World J Gastroenterol	2014	10.3748/wjg.v20.i36.12945
34630912	review articles	Alcoholic liver disease: Current insights into cellular mechanisms	Petagine L	World J Biol Chem	2021	10.4331/wjbc.v12.i5.87
31117206	review articles	Enteroviruses: A Gut-Wrenching Game of Entry, Detection, and Evasion	Wells AI	Viruses	2019	10.3390/v11050460
28823759	review articles	Mechanisms of Hepatitis B Virus Persistence	Tsai KN	Trends Microbiol	2018	10.1016/j.tim.2017.07.006
29843959	review articles	Liver-Microbiome Axis in Health and Disease	Adolph TE	Trends Immunol	2018	10.1016/j.it.2018.05.002
26910326	review articles	The Origin of New-Onset Diabetes After Liver Transplantation: Liver, Islets, or Gut?	Ling Q	Transplantation	2016	10.1097/TP.0000000000001111
30853445	review articles	Role of the intestinal microbiome in liver fibrosis development and new treatment strategies	Zhou R	Transl Res	2019	10.1016/j.trsl.2019.02.005
33073044	review articles	Pathogenesis and pathways: nonalcoholic fatty liver disease & alcoholic liver disease	Robinson KE	Transl Gastroenterol Hepatol	2020	10.21037/tgh.2019.12.05
31723355	review articles	Immune checkpoint inhibitor-associated gastrointestinal and hepatic adverse events and their management	Shivaji UN	Therap Adv Gastroenterol	2019	10.1177/1756284819884196
29471566	review articles	Mucosal-Associated Invariant T Cells in Chronic Inflammatory Liver Disease	Bolte FJ	Semin Liver Dis	2018	10.1055/s-0037-1621709
27997968	review articles	The Microbiome and the Liver: The Basics	Victor DW 3rd	Semin Liver Dis	2016	10.1055/s-0036-1593879
20665376	review articles	Toll-like receptor 4 and hepatic fibrogenesis	Pradere JP	Semin Liver Dis	2010	10.1055/s-0030-1255353
22944142	review articles	Of bugs and joints: the relationship between infection and joints	Espinoza LR	Reumatol Clin	2013	10.1016/j.reuma.2012.06.008
27909908	review articles	Obesity and Liver Cancer	Aleksandrova K	Recent Results Cancer Res	2016	10.1007/978-3-319-42542-9_10
26876265	review articles	[Various pathways leading to the progression of chronic liver diseases]	Egresi A	Orv Hetil	2016	10.1556/650.2015.30377
29644994	review articles	Autoimmune hepatitis	Mieli-Vergani G	Nat Rev Dis Primers	2018	10.1038/nrdp.2018.17
20944559	review articles	Helicobacter hepaticus infection in mice: models for understanding lower bowel inflammation and cancer	Fox JG	Mucosal Immunol	2011	10.1038/mi.2010.61
31590269	review articles	Infectious Complications Following Kidney Transplantation-A Focus on Hepatitis C Infection, Cytomegalovirus Infection and Novel Developments in the Gut Microbiota	Chan S	Medicina (Kaunas)	2019	10.3390/medicina55100672
25684583	review articles	Digestive tract mycobiota: a source of infection	Gouba N	Med Mal Infect	2015	10.1016/j.medmal.2015.01.007
30257633	review articles	The gut microbiota: cause and cure of gut diseases	White LS	Med J Aust	2018	10.5694/mja17.01067
30716203	review articles	Autoimmune hepatitis: Current and future therapeutic options	Doycheva I	Liver Int	2019	10.1111/liv.14062
28404136	review articles	Non-alcoholic fatty liver disease and non-alcoholic steatohepatitis in patients with HIV	Verna EC	Lancet Gastroenterol Hepatol	2017	10.1016/S2468-1253(16)30120-0
32743505	review articles	The complement system in liver diseases: Evidence-based approach and therapeutic options	Lung T	J Transl Autoimmun	2019	10.1016/j.jtauto.2019.100017
22124143	review articles	Role of innate immunity and the microbiota in liver fibrosis: crosstalk between the liver and gut	Seki E	J Physiol	2012	10.1113/jphysiol.2011.219691
34693776	review articles	The Progression of Celiac Disease, Diagnostic Modalities, and Treatment Options	Tarar ZI	J Investig Med High Impact Case Rep	2021	10.1177/23247096211053702
30148173	review articles	The Immunologic Role of Gut Microbiota in Patients with Chronic HBV Infection	Yang R	J Immunol Res	2018	10.1155/2018/2361963
28545829	review articles	Gut microbiota and hepatitis-B-virus-induced chronic liver disease: implications for faecal microbiota transplantation therapy	Kang Y	J Hosp Infect	2017	10.1016/j.jhin.2017.04.007
34039493	review articles	The microbiota in cirrhosis and its role in hepatic decompensation	Trebicka J	J Hepatol	2021	10.1016/j.jhep.2020.11.013
31954488	review articles	Gut microbiome in HCC - Mechanisms, diagnosis and therapy	Schwabe RF	J Hepatol	2020	10.1016/j.jhep.2019.08.016
30658731	review articles	Current trials and novel therapeutic targets for alcoholic hepatitis	Singal AK	J Hepatol	2019	10.1016/j.jhep.2018.10.026
30658727	review articles	Microbiome as a therapeutic target in alcohol-related liver disease	Sarin SK	J Hepatol	2019	10.1016/j.jhep.2018.10.019
30658726	review articles	Inflammatory pathways in alcoholic steatohepatitis	Gao B	J Hepatol	2019	10.1016/j.jhep.2018.10.023
34870783	review articles	The Gut Microbiome and Hepatocellular Carcinoma	Akkız H	J Gastrointest Cancer	2021	10.1007/s12029-021-00748-1
27010240	review articles	Asian consensus on the relationship between obesity and gastrointestinal and liver diseases	Koh JC	J Gastroenterol Hepatol	2016	10.1111/jgh.13385
30509561	review articles	Gut microbiota and pediatric obesity/non-alcoholic fatty liver disease	Yang YJ	J Formos Med Assoc	2019	10.1016/j.jfma.2018.11.006
34204748	review articles	Fecal Microbiota Transplantation in Patients with HBV Infection or Other Chronic Liver Diseases: Update on Current Knowledge and Future Perspectives	Paratore M	J Clin Med	2021	10.3390/jcm10122605
32756323	review articles	Gut Microbiota and Liver Interaction through Immune System Cross-Talk: A Comprehensive Review at the Time of the SARS-CoV-2 Pandemic	Scarpellini E	J Clin Med	2020	10.3390/jcm9082488
32403255	review articles	COVID-19, MERS and SARS with Concomitant Liver Injury-Systematic Review of the Existing Literature	Kukla M	J Clin Med	2020	10.3390/jcm9051420
27741173	review articles	Gut Microbiome and Gastrointestinal Cancer: Les liaisons Dangereuses	Tözün N	J Clin Gastroenterol	2016	10.1097/MCG.0000000000000714
31024208	review articles	Small Intestinal Bacterial Overgrowth in Patients With Cirrhosis	Ghosh G	J Clin Exp Hepatol	2019	10.1016/j.jceh.2018.08.006
30385083	review articles	Etiopathogenesis of autoimmune hepatitis	Floreani A	J Autoimmun	2018	10.1016/j.jaut.2018.10.020
24611784	review articles	Role of viruses and other microbes in the pathogenesis of type 1 diabetes	Kondrashova A	Int Rev Immunol	2014	10.3109/08830185.2014.889130
34884492	review articles	Host Factors in Dysregulation of the Gut Barrier Function during Alcohol-Associated Liver Disease	Maccioni L	Int J Mol Sci	2021	10.3390/ijms222312687
34769109	review articles	The Role of Gut Dysbiosis in Acute-on-Chronic Liver Failure	Kim SE	Int J Mol Sci	2021	10.3390/ijms222111680
33807605	review articles	Mechanisms by Which Probiotic Bacteria Attenuate the Risk of Hepatocellular Carcinoma	Thilakarathna WPDW	Int J Mol Sci	2021	10.3390/ijms22052606
33379148	review articles	The Role of the Gut Microbiome in Liver Cirrhosis Treatment	Lee NY	Int J Mol Sci	2020	10.3390/ijms22010199
32899236	review articles	Alcohol Addiction, Gut Microbiota, and Alcoholism Treatment: A Review	Wang SC	Int J Mol Sci	2020	10.3390/ijms21176413
32825440	review articles	Microbiota-Associated Therapy for Non-Alcoholic Steatohepatitis-Induced Liver Cancer: A Review	Chen YH	Int J Mol Sci	2020	10.3390/ijms21175999
31480433	review articles	Bone Diseases in Patients with Chronic Liver Disease	Jeong HM	Int J Mol Sci	2019	10.3390/ijms20174270
30658519	review articles	Gut-Liver Axis, Gut Microbiota, and Its Modulation in the Management of Liver Diseases: A Review of the Literature	Milosevic I	Int J Mol Sci	2019	10.3390/ijms20020395
24786095	review articles	Molecular mechanisms and new treatment strategies for non-alcoholic steatohepatitis (NASH)	Takaki A	Int J Mol Sci	2014	10.3390/ijms15057352
24132155	review articles	Multiple hits, including oxidative stress, as pathogenesis and treatment target in non-alcoholic steatohepatitis (NASH)	Takaki A	Int J Mol Sci	2013	10.3390/ijms141020704
34328191	review articles	Dysbiosis and liver diseases (Review)	Nishikawa H	Int J Mol Med	2021	10.3892/ijmm.2021.5016
34460287	review articles	The Interplay between Gut Microbiota and the Immune System in Liver Transplant Recipients and Its Role in Infections	Ancona G	Infect Immun	2021	10.1128/IAI.00376-21
34262302	review articles	Alteration of Gut Microbiota and Its Impact on Immune Response in Patients with Chronic HBV Infection: A Review	Kassa Y	Infect Drug Resist	2021	10.2147/IDR.S305901
34596865	review articles	Effect of microbiota metabolites on the progression of chronic hepatitis B virus infection	Sun X	Hepatol Int	2021	10.1007/s12072-021-10230-6
31273617	review articles	Hepatology through the crystal ball	Williams R	Hepatol Int	2019	10.1007/s12072-019-09959-y
32037278	review articles	Human microbiome is a diagnostic biomarker in hepatocellular carcinoma	Rao BC	Hepatobiliary Pancreat Dis Int	2020	10.1016/j.hbpd.2020.01.003
30527903	review articles	Gut microbial dysbiosis associates hepatocellular carcinoma via the gut-liver axis	Jiang JW	Hepatobiliary Pancreat Dis Int	2019	10.1016/j.hbpd.2018.11.002
31496843	review articles	Severe alcoholic hepatitis: current perspectives	Philips CA	Hepat Med	2019	10.2147/HMER.S197933
25006881	review articles	The role of the gut microbiome in the development and progression of liver cirrhosis and hepatocellular carcinoma	Roderburg C	Gut Microbes	2014	10.4161/gmic.29599
26673641	review articles	Gut Microbiota and Hepatocellular Carcinoma	Tao X	Gastrointest Tumors	2015	10.1159/000380895
28807841	review articles	Racial Disparity in Gastrointestinal Cancer Risk	Ashktorab H	Gastroenterology	2017	10.1053/j.gastro.2017.08.018
26948887	review articles	Changes in the Intestinal Microbiome and Alcoholic and Nonalcoholic Liver Diseases: Causes or Effects?	Betrapally NS	Gastroenterology	2016	10.1053/j.gastro.2016.02.073
31564673	review articles	Gut and oral microbiota in autoimmune liver disease	Abe K	Fukushima J Med Sci	2020	10.5387/fms.2019-21
23087650	review articles	The intestinal microbiome and the leaky gut as therapeutic targets in alcoholic liver disease	Hartmann P	Front Physiol	2012	10.3389/fphys.2012.00402
34803712	review articles	The Potential Application of Chinese Medicine in Liver Diseases: A New Opportunity	Fu K	Front Pharmacol	2021	10.3389/fphar.2021.771459
34630107	review articles	Probiotics-Based Treatment as an Integral Approach for Alcohol Use Disorder in Alcoholic Liver Disease	Fuenzalida C	Front Pharmacol	2021	10.3389/fphar.2021.729950
34512631	review articles	Gut-Liver Immune Traffic: Deciphering Immune-Pathogenesis to Underpin Translational Therapy	Bozward AG	Front Immunol	2021	10.3389/fimmu.2021.711217
32612603	review articles	Role of Kupffer Cells in Driving Hepatic Inflammation and Fibrosis in HIV Infection	Zhang L	Front Immunol	2020	10.3389/fimmu.2020.01086
30254647	review articles	Complex Network of NKT Cell Subsets Controls Immune Homeostasis in Liver and Gut	Marrero I	Front Immunol	2018	10.3389/fimmu.2018.02082
29636752	review articles	Autoantibodies in Autoimmune Liver Disease-Clinical and Diagnostic Relevance	Sebode M	Front Immunol	2018	10.3389/fimmu.2018.00609
34957088	review articles	Molecular Immune Mechanism of Intestinal Microbiota and Their Metabolites in the Occurrence and Development of Liver Cancer	Bi C	Front Cell Dev Biol	2021	10.3389/fcell.2021.702414
29490382	review articles	[Major depression and liver disease: the role of microbiome and inflammation]	Kahl KG	Fortschr Neurol Psychiatr	2019	10.1055/s-0043-123068
33435315	review articles	Probiotic Effects against Virus Infections: New Weapons for an Old War	Lopez-Santamarina A	Foods	2021	10.3390/foods10010130
34087406	review articles	Quercetin and non-alcoholic fatty liver disease: A review based on experimental data and bioinformatic analysis	Chen L	Food Chem Toxicol	2021	10.1016/j.fct.2021.112314
34473374	review articles	Novel approaches to intervene gut microbiota in the treatment of chronic liver diseases	Liu C	FASEB J	2021	10.1096/fj.202100939R
34632902	review articles	Investigation of etiology-specific alterations in the gut microbiota in liver cirrhosis	Naseri M	Expert Rev Gastroenterol Hepatol	2021	10.1080/17474124.2021.1991312
30261763	review articles	An update on the recent advances in antifibrotic therapy	Tacke F	Expert Rev Gastroenterol Hepatol	2018	10.1080/17474124.2018.1530110
28621554	review articles	Gut microbiota changes and chronic hepatitis C virus infection	Preveden T	Expert Rev Gastroenterol Hepatol	2017	10.1080/17474124.2017.1343663
28406324	review articles	Evolving paradigm of treatment for autoimmune hepatitis	Czaja AJ	Expert Rev Clin Immunol	2017	10.1080/1744666X.2017.1319764
28077318	review articles	Alcohol, microbiome, life style influence alcohol and non-alcoholic organ damage	Neuman MG	Exp Mol Pathol	2017	10.1016/j.yexmp.2017.01.003
25807441	review articles	General issues on microbial translocation in HIV-infected patients	Novati S	Eur Rev Med Pharmacol Sci	2015
26272175	review articles	Gut microbiota modulate the immune effect against hepatitis B virus infection	Xu D	Eur J Clin Microbiol Infect Dis	2015	10.1007/s10096-015-2464-0
28517024	review articles	Treatment of severe alcoholic hepatitis: past, present and future	Lanthier N	Eur J Clin Invest	2017	10.1111/eci.12767
32020359	review articles	Fecal Microbiota Transplantation for Chronic Liver Diseases: Current Understanding and Future Direction	Lechner S	Dig Dis Sci	2020	10.1007/s10620-020-06100-0
29671161	review articles	Under-Evaluated or Unassessed Pathogenic Pathways in Autoimmune Hepatitis and Implications for Future Management	Czaja AJ	Dig Dis Sci	2018	10.1007/s10620-018-5072-x
28710658	review articles	Global Disparities and Their Implications in the Occurrence and Outcome of Autoimmune Hepatitis	Czaja AJ	Dig Dis Sci	2017	10.1007/s10620-017-4675-y
27548822	review articles	Extrahepatic Diseases and NAFLD: The Triangular Relationship between NAFLD, Type 2-Diabetes and Dysbiosis	Scorletti E	Dig Dis	2016	10.1159/000447276
29271563	review articles	Is metformin poised for a second career as an antimicrobial?	Malik F	Diabetes Metab Res Rev	2018	10.1002/dmrr.2975
34242953	review articles	Gut microbiota in the innate immunity against hepatitis B virus - implication in age-dependent HBV clearance	Wu LL	Curr Opin Virol	2021	10.1016/j.coviro.2021.06.006
32480317	review articles	Bile acid-activated receptors and the regulation of macrophages function in metabolic disorders	Fiorucci S	Curr Opin Pharmacol	2020	10.1016/j.coph.2020.04.008
33769374	review articles	Novel treatments for alcoholic hepatitis	German MN	Curr Opin Gastroenterol	2021	10.1097/MOG.0000000000000725
33315793	review articles	Autoimmune hepatitis: from immunopathogenesis to diagnostic and therapeutic innovation	Weiler-Normann C	Curr Opin Gastroenterol	2021	10.1097/MOG.0000000000000701
28770495	review articles	Fecal Microbiota Transplantation: Beyond Clostridium difficile	Millan B	Curr Infect Dis Rep	2017	10.1007/s11908-017-0586-5
27747458	review articles	Acute-on-chronic Liver Failure	Sarin SK	Curr Gastroenterol Rep	2016	10.1007/s11894-016-0535-8
30047327	review articles	Gut Mycobiota and Fungal Metabolites in Human Homeostasis	Mogilnicka I	Curr Drug Targets	2019	10.2174/1389450119666180724125020
34754704	review articles	Hepatocellular Carcinoma in 2021: An Exhaustive Update	Philips CA	Cureus	2021	10.7759/cureus.19274
26193867	review articles	Combination therapy: New hope for alcoholic hepatitis?	Gao B	Clin Res Hepatol Gastroenterol	2015	10.1016/j.clinre.2015.05.008
33053942	review articles	Nonalcoholic fatty liver disease and alcohol-related liver disease: From clinical aspects to pathophysiological insights	Ikejima K	Clin Mol Hepatol	2020	10.3350/cmh.2020.0202
32981291	review articles	Emerging medical therapies for severe alcoholic hepatitis	Tornai D	Clin Mol Hepatol	2020	10.3350/cmh.2020.0145
26163104	review articles	Chronic hepatitis B virus and hepatitis C virus infections and cancer: synergy between viral and host factors	Schinzari V	Clin Microbiol Infect	2015	10.1016/j.cmi.2015.06.026
34229836	review articles	Current and Future Biomarkers in Alcoholic Hepatitis	Rutledge SM	Clin Liver Dis	2021	10.1016/j.cld.2021.03.010
29128052	review articles	The Intestinal Microbiome in Nonalcoholic Fatty Liver Disease	Puri P	Clin Liver Dis	2018	10.1016/j.cld.2017.08.009
27373608	review articles	Pathogenesis of Alcoholic Liver Disease	Dunn W	Clin Liver Dis	2016	10.1016/j.cld.2016.02.004
34666025	review articles	Gut microbiome and metabolic response in non-alcoholic fatty liver disease	Madatali Abuwani A	Clin Chim Acta	2021	10.1016/j.cca.2021.10.014
28767077	review articles	Gut-Liver Axis Derangement in Non-Alcoholic Fatty Liver Disease	Poeta M	Children (Basel)	2017	10.3390/children4080066
21604434	review articles	[Prague Hepatology Meeting 2010--hepatopathology news]	Ehrmann J	Cesk Patol	2011
32791115	review articles	Microbiota and Fatty Liver Disease-the Known, the Unknown, and the Future	Lang S	Cell Host Microbe	2020	10.1016/j.chom.2020.07.007
34572959	review articles	Senescence in HBV-, HCV- and NAFLD- Mediated Hepatocellular Carcinoma and Senotherapeutics: Current Evidence and Future Perspective	Giannakoulis VG	Cancers (Basel)	2021	10.3390/cancers13184732
34533882	review articles	Gut-liver axis-mediated mechanism of liver cancer: A special focus on the role of gut microbiota	Ohtani N	Cancer Sci	2021	10.1111/cas.15142
29761927	review articles	On the potential role of intestinal microbial community in hepatocarcinogenesis in chronic hepatitis B	Mohamadkhani A	Cancer Med	2018	10.1002/cam4.1550
32234090	review articles	Diet and liver cancer risk: a narrative review of epidemiological evidence	Yang WS	Br J Nutr	2020	10.1017/S0007114520001208
29304776	review articles	Is weak CD4+ gain in the course of suppressive combination antiretroviral therapy for HIV infection a current clinical challenge? A case report and brief review of the literature	Tincati C	BMC Infect Dis	2018	10.1186/s12879-017-2942-3
31726661	review articles	Viral Infections and Interferons in the Development of Obesity	Tian Y	Biomolecules	2019	10.3390/biom9110726
32197424	review articles	Alcoholic-Hepatitis, Links to Brain and Microbiome: Mechanisms, Clinical and Experimental Research	Neuman MG	Biomedicines	2020	10.3390/biomedicines8030063
30424581	review articles	Alcoholic Liver Disease: Alcohol Metabolism, Cascade of Molecular Mechanisms, Cellular Targets, and Clinical Aspects	Teschke R	Biomedicines	2018	10.3390/biomedicines6040106
31886272	review articles	Advances in Gut Microbiota of Viral Hepatitis Cirrhosis	Wang Y	Biomed Res Int	2019	10.1155/2019/9726786
33451143	review articles	Changes of Gut-Microbiota-Liver Axis in Hepatitis C Virus Infection	El-Mowafy M	Biology (Basel)	2021	10.3390/biology10010055
32535108	review articles	Aryl hydrocarbon receptor (AHR) functions: Balancing opposing processes including inflammatory reactions	Bock KW	Biochem Pharmacol	2020	10.1016/j.bcp.2020.114093
29566910	review articles	Intestinal microbiome and permeability in patients with autoimmune hepatitis	Cai W	Best Pract Res Clin Gastroenterol	2017	10.1016/j.bpg.2017.09.013
32178720	review articles	The search for the Holy Grail: autoantigenic targets in primary sclerosing cholangitis associated with disease phenotype and neoplasia	Lopens S	Auto Immun Highlights	2020	10.1186/s13317-020-00129-x
33569476	review articles	A narrative review of the roles of indoleamine 2,3-dioxygenase and tryptophan-2,3-dioxygenase in liver diseases	Zhou Q	Ann Transl Med	2021	10.21037/atm-20-3594
31657225	review articles	Role of gut microbiota in liver disease	Albhaisi SAM	Am J Physiol Gastrointest Liver Physiol	2020	10.1152/ajpgi.00118.2019
30767680	review articles	Gut microbiota in liver disease: too much is harmful, nothing at all is not helpful either	Hartmann P	Am J Physiol Gastrointest Liver Physiol	2019	10.1152/ajpgi.00370.2018
31689142	review articles	Changes in the composition of the human intestinal microbiome in alcohol use disorder: a systematic review	Litwinowicz K	Am J Drug Alcohol Abuse	2020	10.1080/00952990.2019.1669629
32592252	review articles	Editorial: gut microbiota profile in patients with autoimmune hepatitis-a clue for adjunctive probiotic therapy?	Granito A	Aliment Pharmacol Ther	2020	10.1111/apt.15795
32592249	review articles	Editorial: gut microbiota profile in patients with autoimmune hepatitis-a clue for adjunctive probiotic therapy? Authors' reply	Liwinski T	Aliment Pharmacol Ther	2020	10.1111/apt.15819
28901565	review articles	Review article: next-generation transformative advances in the pathogenesis and management of autoimmune hepatitis	Czaja AJ	Aliment Pharmacol Ther	2017	10.1111/apt.14324
25872593	review articles	Alcoholic liver disease: the gut microbiome and liver cross talk	Hartmann P	Alcohol Clin Exp Res	2015	10.1111/acer.12704
28482064	review articles	Gut-liver axis and sterile signals in the development of alcoholic liver disease	Szabo G	Alcohol Alcohol	2017	10.1093/alcalc/agx025
31294219	review articles	Autoimmune liver disease and the enteric microbiome	Glassner K	AIMS Microbiol	2018	10.3934/microbiol.2018.2.334
28893288	review articles	Potential contribution of gut microbiota and systemic inflammation on HIV vaccine effectiveness and vaccine design	Routy JP	AIDS Res Ther	2017	10.1186/s12981-017-0164-9
28471945	review articles	Metabolic concerns in aging HIV-infected persons: from serum lipid phenotype to fatty liver	Guaraldi G	AIDS	2017	10.1097/QAD.0000000000001483
28471941	review articles	Basic science and pathogenesis of ageing with HIV: potential mechanisms and biomarkers	Lagathu C	AIDS	2017	10.1097/QAD.0000000000001441
32323179	review articles	Gut Microbiota and Liver Injury (II): Chronic Liver Injury	Baker SS	Adv Exp Med Biol	2020	10.1007/978-981-15-2385-4_4
21290746	review articles	Enterohepatic Helicobacter Species	Schauer DB	Helicobacter pylori: Physiology and Genetics	2001
33902185	review articles	[Liver cirrhosis and secondary osteoporosis]	Yang L	Zhonghua Gan Zang Bing Za Zhi	2021	10.3760/cma.j.cn501113-20210208-00078
31288283	review articles	[Microbiome & NASH - partners in crime driving progression of fatty liver disease]	Wree A	Z Gastroenterol	2019	10.1055/a-0755-2595
32952873	review articles	Update on diagnosis and management of sepsis in cirrhosis: Current advances	Philips CA	World J Hepatol	2020	10.4254/wjh.v12.i8.451
31293718	review articles	Dietary approach and gut microbiota modulation for chronic hepatic encephalopathy in cirrhosis	Campion D	World J Hepatol	2019	10.4254/wjh.v11.i6.489
27721918	review articles	Implication of the intestinal microbiome in complications of cirrhosis	Bhat M	World J Hepatol	2016	10.4254/wjh.v8.i27.1128
25848479	review articles	Probiotics as a complementary therapeutic approach in nonalcoholic fatty liver disease	Ferolla SM	World J Hepatol	2015	10.4254/wjh.v7.i3.559
34168407	review articles	Current approach to treatment of minimal hepatic encephalopathy in patients with liver cirrhosis	Moran S	World J Gastroenterol	2021	10.3748/wjg.v27.i22.3050
33716447	review articles	G protein-coupled receptors as potential targets for nonalcoholic fatty liver disease treatment	Yang M	World J Gastroenterol	2021	10.3748/wjg.v27.i8.677
33177790	review articles	Role of gut microbiota via the gut-liver-brain axis in digestive diseases	Ding JH	World J Gastroenterol	2020	10.3748/wjg.v26.i40.6141
31660028	review articles	Gut-liver axis signaling in portal hypertension	Simbrunner B	World J Gastroenterol	2019	10.3748/wjg.v25.i39.5897
31543676	review articles	Intestinal permeability in the pathogenesis of liver damage: From non-alcoholic fatty liver disease to liver transplantation	Nicoletti A	World J Gastroenterol	2019	10.3748/wjg.v25.i33.4814
26604640	review articles	Effect of rifaximin on gut microbiota composition in advanced liver disease and its complications	Ponziani FR	World J Gastroenterol	2015	10.3748/wjg.v21.i43.12322
26556989	review articles	Gut microbiota and host metabolism in liver cirrhosis	Usami M	World J Gastroenterol	2015	10.3748/wjg.v21.i41.11597
26556982	review articles	Immunomodulating effects of antibiotics used in the prophylaxis of bacterial infections in advanced cirrhosis	Zapater P	World J Gastroenterol	2015	10.3748/wjg.v21.i41.11493
25492994	review articles	Microbiota and the gut-liver axis: bacterial translocation, inflammation and infection in cirrhosis	Giannelli V	World J Gastroenterol	2014	10.3748/wjg.v20.i45.16795
25469033	review articles	Gut microbiota in alcoholic liver disease: pathogenetic role and therapeutic perspectives	Malaguarnera G	World J Gastroenterol	2014	10.3748/wjg.v20.i44.16639
25469013	review articles	Obesity, fatty liver disease and intestinal microbiota	Arslan N	World J Gastroenterol	2014	10.3748/wjg.v20.i44.16452
25400446	review articles	Gut microbiota-related complications in cirrhosis	Gómez-Hurtado I	World J Gastroenterol	2014	10.3748/wjg.v20.i42.15624
25339806	review articles	Nonalcoholic fatty liver disease and aging: epidemiology to management	Bertolotti M	World J Gastroenterol	2014	10.3748/wjg.v20.i39.14185
24587650	review articles	Clinical approaches to non-alcoholic fatty liver disease	Schwenger KJ	World J Gastroenterol	2014	10.3748/wjg.v20.i7.1712
23239905	review articles	Prevention and treatment of hepatic encephalopathy: focusing on gut microbiota	Garcovich M	World J Gastroenterol	2012	10.3748/wjg.v18.i46.6693
26468308	review articles	Biliary Mucosal Barrier and Microbiome	Verdier J	Viszeralmedizin	2015	10.1159/000431071
29163959	review articles	The gut microbiota: A new potential driving force in liver cirrhosis and hepatocellular carcinoma	Sanduzzi Zamparelli M	United European Gastroenterol J	2017	10.1177/2050640617705576
25003670	review articles	Nonalcoholic fatty liver disease: diagnosis, pathogenesis, and management	Başaranoğlu M	Turk J Gastroenterol	2014	10.5152/tjg.2014.7675
30300287	review articles	Nonalcoholic Fatty Liver Disease: Basic Pathogenetic Mechanisms in the Progression From NAFLD to NASH	Pierantonelli I	Transplantation	2019	10.1097/TP.0000000000002480
26647107	review articles	The Intestinal Microbiome and the Liver Transplant Recipient: What We Know and What We Need to Know	Doycheva I	Transplantation	2016	10.1097/TP.0000000000001008
27477080	review articles	Gut microbiome and liver disease	Betrapally NS	Transl Res	2017	10.1016/j.trsl.2016.07.005
33409398	review articles	Gut microbiome changes in Nonalcoholic fatty liver disease & alcoholic liver disease	Kwong EK	Transl Gastroenterol Hepatol	2021	10.21037/tgh.2020.02.18
33340925	review articles	Translational insight into prothrombotic state and hypercoagulation in nonalcoholic fatty liver disease	Ciavarella A	Thromb Res	2021	10.1016/j.thromres.2020.12.002
27920543	review articles	Intestinal permeability in a patient with liver cirrhosis	Aguirre Valadez JM	Ther Clin Risk Manag	2016	10.2147/TCRM.S115902
31205505	review articles	Diagnostic and therapeutic potential of the gut microbiota in patients with early hepatocellular carcinoma	Ponziani FR	Ther Adv Med Oncol	2019	10.1177/1758835919848184
28914862	review articles	[Liver diseases: The pathogenetic role of the gut microbiome and the potential of treatment for its modulation]	Aitbaev KA	Ter Arkh	2017	10.17116/terarkh2017898120-128
34261137	review articles	Clinical Application and Progress of Fecal Microbiota Transplantation in Liver Diseases: A Review	Gu X	Semin Liver Dis	2021	10.1055/s-0041-1732319
29272899	review articles	Systematic Review and Meta-Analysis: Prevalence of Small Intestinal Bacterial Overgrowth in Chronic Liver Disease	Shah A	Semin Liver Dis	2017	10.1055/s-0037-1608832
27997975	review articles	Primary Biliary Cirrhosis and the Microbiome	Quigley EM	Semin Liver Dis	2016	10.1055/s-0036-1594006
27997973	review articles	Bidirectional Communication between Liver and Gut during Alcoholic Liver Disease	Stärkel P	Semin Liver Dis	2016	10.1055/s-0036-1593882
27997972	review articles	Changes in the Microbiome in Cirrhosis and Relationship to Complications: Hepatic Encephalopathy, Spontaneous Bacterial Peritonitis, and Sepsis	Lachar J	Semin Liver Dis	2016	10.1055/s-0036-1593881
26870931	review articles	Targeting Dysbiosis for the Treatment of Liver Disease	Anand G	Semin Liver Dis	2016	10.1055/s-0035-1571276
26870928	review articles	New Therapeutic Strategies for Primary Sclerosing Cholangitis	Williamson KD	Semin Liver Dis	2016	10.1055/s-0035-1571274
25436233	review articles	Is there a role for probiotics in liver disease?	Lo RS	ScientificWorldJournal	2014	10.1155/2014/874768
33840331	review articles	Fecal microbiota transplantation in hepatic encephalopathy: a systematic review	Madsen M	Scand J Gastroenterol	2021	10.1080/00365521.2021.1899277
24990660	review articles	Primary sclerosing cholangitis and the microbiota: current knowledge and perspectives on etiopathogenesis and emerging therapies	Tabibian JH	Scand J Gastroenterol	2014	10.3109/00365521.2014.913189
30695468	review articles	[Progress in the Management of NAFLD/NASH]	Aizawa Y	Rinsho Byori	2016
27515958	review articles	Gut Microbiota and Alcoholic Liver Disease	Scarpellini E	Rev Recent Clin Trials	2016	10.2174/1574887111666160810100538
26502621	review articles	[Factors influencing development and progression of alcoholic liver disease]	Abdelrahman K	Rev Med Suisse	2015
31564473	review articles	Review of the scientific evidence and technical opinion on noncaloric sweetener consumption in gastrointestinal diseases	Bueno-Hernández N	Rev Gastroenterol Mex (Engl Ed)	2019	10.1016/j.rgmx.2019.08.001
29413959	review articles	Role of gut microbiota and oxidative stress in the progression of non-alcoholic fatty liver disease to hepatocarcinoma: Current and innovative therapeutic approaches	Borrelli A	Redox Biol	2018	10.1016/j.redox.2018.01.009
29691757	review articles	Microbiota transplantation: concept, methodology and strategy for its modernization	Zhang F	Protein Cell	2018	10.1007/s13238-018-0541-8
34450307	review articles	Traditional Chinese medicine in the treatment of nonalcoholic steatohepatitis	Chen M	Pharmacol Res	2021	10.1016/j.phrs.2021.105849
30658094	review articles	Intestinally derived bacterial products stimulate development of nonalcoholic steatohepatitis	Dornas W	Pharmacol Res	2019	10.1016/j.phrs.2019.01.026
34463983	review articles	Periodontal disease-related nonalcoholic fatty liver disease and nonalcoholic steatohepatitis: An emerging concept of oral-liver axis	Kuraji R	Periodontol 2000	2021	10.1111/prd.12387
30175608	review articles	[The role of gut microbiota in chronic liver diseases, and treatment possibilities]	Hagymási K	Orv Hetil	2018	10.1556/650.2018.31178
27072576	review articles	Utilization of animal models to investigate nonalcoholic steatohepatitis-associated hepatocellular carcinoma	Wu J	Oncotarget	2016	10.18632/oncotarget.8641
27822768	review articles	Pediatric Nonalcoholic Fatty Liver Disease: the Rise of a Lethal Disease Among Mexican American Hispanic Children	Betancourt-Garcia MM	Obes Surg	2017	10.1007/s11695-016-2440-5
30589487	review articles	Crosstalk between nonalcoholic fatty liver disease and cardiometabolic syndrome	Lim S	Obes Rev	2019	10.1111/obr.12820
32065881	review articles	Manipulation of microbiota with probiotics as an alternative for treatment of hepatic encephalopathy	Rivera-Flores R	Nutrition	2020	10.1016/j.nut.2019.110693
34684510	review articles	Indole-3-Propionic Acid, a Gut-Derived Tryptophan Metabolite, Associates with Hepatic Fibrosis	Sehgal R	Nutrients	2021	10.3390/nu13103509
34579046	review articles	Alcohol's Impact on the Gut and Liver	Pohl K	Nutrients	2021	10.3390/nu13093170
34444807	review articles	Bariatric Surgery and Liver Disease: General Considerations and Role of the Gut-Liver Axis	Cerreto M	Nutrients	2021	10.3390/nu13082649
34064981	review articles	Protective Mechanism of Edible Food Plants against Alcoholic Liver Disease with Special Mention to Polyphenolic Compounds	Zhao L	Nutrients	2021	10.3390/nu13051612
33801133	review articles	The Gut-Liver Axis in Cholestatic Liver Diseases	Blesl A	Nutrients	2021	10.3390/nu13031018
33562292	review articles	Malnutrition in Patients with Liver Cirrhosis	Traub J	Nutrients	2021	10.3390/nu13020540
33053631	review articles	Microbiota, Fiber, and NAFLD: Is There Any Connection?	Pérez-Montes de Oca A	Nutrients	2020	10.3390/nu12103100
32230953	review articles	Inflammation in Primary and Metastatic Liver Tumorigenesis-Under the Influence of Alcohol and High-Fat Diets	Strathearn LS	Nutrients	2020	10.3390/nu12040933
31689910	review articles	The Role of Probiotics in Nonalcoholic Fatty Liver Disease: A New Insight into Therapeutic Strategies	Meroni M	Nutrients	2019	10.3390/nu11112642
25479248	review articles	The role of intestinal bacteria overgrowth in obesity-related nonalcoholic fatty liver disease	Ferolla SM	Nutrients	2014	10.3390/nu6125583
33601216	review articles	G protein-coupled receptors: Key molecules in metabolic associated fatty liver disease development	López-Méndez I	Nutr Res	2021	10.1016/j.nutres.2020.12.019
26449892	review articles	Role of the Gut Microbiome in Nonalcoholic Fatty Liver Disease	Aqel B	Nutr Clin Pract	2015	10.1177/0884533615605811
33257833	review articles	Utilizing the gut microbiome in decompensated cirrhosis and acute-on-chronic liver failure	Trebicka J	Nat Rev Gastroenterol Hepatol	2021	10.1038/s41575-020-00376-3
32152478	review articles	Gut microbiota and human NAFLD: disentangling microbial signatures from metabolic disorders	Aron-Wisnewsky J	Nat Rev Gastroenterol Hepatol	2020	10.1038/s41575-020-0269-9
29748586	review articles	The gut-liver axis and the intersection with the microbiome	Tripathi A	Nat Rev Gastroenterol Hepatol	2018	10.1038/s41575-018-0011-z
29686404	review articles	Systems biology in hepatology: approaches and applications	Mardinoglu A	Nat Rev Gastroenterol Hepatol	2018	10.1038/s41575-018-0007-8
27188459	review articles	Nonalcoholic fatty liver disease	Brunt EM	Nat Rev Dis Primers	2015	10.1038/nrdp.2015.80
34931080	review articles	Non-alcoholic fatty liver disease: the interplay between metabolism, microbes and immunity	Tilg H	Nat Metab	2021	10.1038/s42255-021-00501-9
32738185	review articles	The Gut Microbiota and Its Metabolites, Novel Targets for Treating and Preventing Non-Alcoholic Fatty Liver Disease	Ni Y	Mol Nutr Food Res	2020	10.1002/mnfr.202000375
26300318	review articles	Nonalcoholic fatty liver disease: Roles of the gut and the liver and metabolic modulation by some dietary factors and especially long-chain n-3 PUFA	Delarue J	Mol Nutr Food Res	2016	10.1002/mnfr.201500346
30367438	review articles	[Gut-liver axis: How intestinal bacteria affect the liver]	Konturek PC	MMW Fortschr Med	2018	10.1007/s15006-018-1051-6
28927250	review articles	Gut microbiota and the liver	Federico A	Minerva Gastroenterol Dietol	2017	10.23736/S1121-421X.17.02375-3
24829682	review articles	Probiotics and Nonalcoholic Fatty liver Disease	Eslamparast T	Middle East J Dig Dis	2013
34066850	review articles	Human Gut Microbiome and Liver Diseases: From Correlation to Causation	Li R	Microorganisms	2021	10.3390/microorganisms9051017
33946843	review articles	Gut Microbiota and NAFLD: Pathogenetic Mechanisms, Microbiota Signatures, and Therapeutic Interventions	Hrncir T	Microorganisms	2021	10.3390/microorganisms9050957
32916966	review articles	Disease, Drugs and Dysbiosis: Understanding Microbial Signatures in Metabolic Disease and Medical Interventions	Proffitt C	Microorganisms	2020	10.3390/microorganisms8091381
27682116	review articles	Gut Microbiota and Host Reaction in Liver Diseases	Fukui H	Microorganisms	2015	10.3390/microorganisms3040759
34127070	review articles	Review: microbial transformations of human bile acids	Guzior DV	Microbiome	2021	10.1186/s40168-021-01101-1
24629562	review articles	Obesity-associated mechanisms of hepatocarcinogenesis	Karagozian R	Metabolism	2014	10.1016/j.metabol.2014.01.011
27121846	review articles	Probiotics in management of hepatic encephalopathy	Sharma BC	Metab Brain Dis	2016	10.1007/s11011-016-9826-x
26446022	review articles	Clinical science workshop: targeting the gut-liver-brain axis	Patel VC	Metab Brain Dis	2016	10.1007/s11011-015-9743-4
26419384	review articles	What is new about diet in hepatic encephalopathy	Merli M	Metab Brain Dis	2016	10.1007/s11011-015-9734-5
23463489	review articles	Gut microbiota and hepatic encephalopathy	Dhiman RK	Metab Brain Dis	2013	10.1007/s11011-013-9388-0
33879696	review articles	The efficacy of a multistrain probiotic on cognitive function and risk of falls in patients with cirrhosis: A protocol for systematic review and meta-analysis	Wang N	Medicine (Baltimore)	2021	10.1097/MD.0000000000025535
33311428	review articles	Cell Sources and Influencing Factors of Liver Regeneration: A Review	Zhu C	Med Sci Monit	2020	10.12659/MSM.929129
29316191	review articles	Microbiota and the liver	Shen TD	Liver Transpl	2018	10.1002/lt.25008
31125502	review articles	The gut microbial influence on cholestatic liver disease	Kummen M	Liver Int	2019	10.1111/liv.14153
30312513	review articles	Potential mechanisms linking gut microbiota and portal hypertension	Baffy G	Liver Int	2019	10.1111/liv.13986
26561779	review articles	The enteric microbiome in hepatobiliary health and disease	Tabibian JH	Liver Int	2016	10.1111/liv.13009
23879434	review articles	Intestinal epithelial barrier function in liver cirrhosis: an extensive review of the literature	Pijls KE	Liver Int	2013	10.1111/liv.12271
34793769	review articles	Bile acids as regulatory molecules and potential targets in metabolic diseases	Xie AJ	Life Sci	2021	10.1016/j.lfs.2021.120152
32738359	review articles	The role of gut microbiome in chemical-induced metabolic and toxicological murine disease models	Dey P	Life Sci	2020	10.1016/j.lfs.2020.118172
30145857	review articles	[Spontaneous Bacterial Peritonitis]	Song DS	Korean J Gastroenterol	2018	10.4166/kjg.2018.72.2.56
34611619	review articles	The neurogliovascular unit in hepatic encephalopathy	Claeys W	JHEP Rep	2021	10.1016/j.jhepr.2021.100352
28978799	review articles	Microbiota, cirrhosis, and the emerging oral-gut-liver axis	Acharya C	JCI Insight	2017	10.1172/jci.insight.94416
25506780	review articles	Nonalcoholic fatty liver disease: a challenge for pediatricians	Nobili V	JAMA Pediatr	2015	10.1001/jamapediatrics.2014.2702
30553904	review articles	Heart Failure and Liver Disease: Cardiohepatic Interactions	Xanthopoulos A	JACC Heart Fail	2019	10.1016/j.jchf.2018.10.007
32801031	review articles	Anti-inflammatory activities of green tea catechins along the gut-liver axis in nonalcoholic fatty liver disease: lessons learned from preclinical and human studies	Hodges JK	J Nutr Biochem	2020	10.1016/j.jnutbio.2020.108478
29653359	review articles	The role of the gut microbiota in the pathology and prevention of liver disease	Altamirano-Barrera A	J Nutr Biochem	2018	10.1016/j.jnutbio.2018.03.006
29539590	review articles	Fructose liquid and solid formulations differently affect gut integrity, microbiota composition and related liver toxicity: a comparative in vivo study	Mastrocola R	J Nutr Biochem	2018	10.1016/j.jnutbio.2018.02.003
25595554	review articles	Methods to determine intestinal permeability and bacterial translocation during liver disease	Wang L	J Immunol Methods	2015	10.1016/j.jim.2014.12.015
34437908	review articles	Intestinal virome and therapeutic potential of bacteriophages in liver disease	Hsu CL	J Hepatol	2021	10.1016/j.jhep.2021.08.003
32004593	review articles	Microbiota changes and intestinal microbiota transplantation in liver diseases and cirrhosis	Bajaj JS	J Hepatol	2020	10.1016/j.jhep.2020.01.017
31622696	review articles	The gut-liver axis in liver disease: Pathophysiological basis for therapy	Albillos A	J Hepatol	2020	10.1016/j.jhep.2019.10.003
29408694	review articles	Fructose and sugar: A major mediator of non-alcoholic fatty liver disease	Jensen T	J Hepatol	2018	10.1016/j.jhep.2018.01.019
28526488	review articles	Targeting the gut-liver axis in liver disease	Wiest R	J Hepatol	2017	10.1016/j.jhep.2017.05.007
27515775	review articles	Sarcopenia from mechanism to diagnosis and treatment in liver disease	Dasarathy S	J Hepatol	2016	10.1016/j.jhep.2016.07.040
23993913	review articles	Pathological bacterial translocation in liver cirrhosis	Wiest R	J Hepatol	2014	10.1016/j.jhep.2013.07.044
33150145	review articles	Gut Microbiota, Peroxisome Proliferator-Activated Receptors, and Hepatocellular Carcinoma	Yu Q	J Hepatocell Carcinoma	2020	10.2147/JHC.S277870
34750696	review articles	Hepatocellular Cancer and Gut Microbiome: Time to Untie Gordian's Knot	Aygün C	J Gastrointest Cancer	2021	10.1007/s12029-021-00736-5
24547986	review articles	Gut microbiota and liver disease	Goel A	J Gastroenterol Hepatol	2014	10.1111/jgh.12556
23855300	review articles	Alcoholic liver disease: pathogenesis, management, and novel targets for therapy	Orman ES	J Gastroenterol Hepatol	2013	10.1111/jgh.12030
32222826	review articles	Emerging therapies in primary sclerosing cholangitis: pathophysiological basis and clinical opportunities	Vesterhus M	J Gastroenterol	2020	10.1007/s00535-020-01681-z
30392013	review articles	Antimicrobial proteins: intestinal guards to protect against liver disease	Hendrikx T	J Gastroenterol	2019	10.1007/s00535-018-1521-8
30655033	review articles	Microbiota and gastrointestinal cancer	Weng MT	J Formos Med Assoc	2019	10.1016/j.jfma.2019.01.002
26406351	review articles	Nonalcoholic fatty liver disease - current status and future directions	Demir M	J Dig Dis	2015	10.1111/1751-2980.12291
28936406	review articles	Gut Microbiome-based Therapeutics in Liver Cirrhosis: Basic Consideration for the Next Step	Fukui H	J Clin Transl Hepatol	2017	10.14218/JCTH.2017.00008
28507927	review articles	Immune Dysfunction in Cirrhosis	Noor MT	J Clin Transl Hepatol	2017	10.14218/JCTH.2016.00056
34501267	review articles	Therapeutic Applications of Resveratrol in Hepatic Encephalopathy through Its Regulation of the Microbiota, Brain Edema, and Inflammation	Kim YK	J Clin Med	2021	10.3390/jcm10173819
33919600	review articles	The Management of Cholestatic Liver Diseases: Current Therapies and Emerging New Possibilities	Mazzetti M	J Clin Med	2021	10.3390/jcm10081763
32823983	review articles	Liver Steatosis, Gut-Liver Axis, Microbiome and Environmental Factors. A Never-Ending Bidirectional Cross-Talk	Di Ciaula A	J Clin Med	2020	10.3390/jcm9082648
26447961	review articles	Probiotics in Nonalcoholic Fatty Liver Disease, Nonalcoholic Steatohepatitis, and Cirrhosis	Qamar AA	J Clin Gastroenterol	2015	10.1097/MCG.0000000000000347
26155043	review articles	The Riddle of Nonalcoholic Fatty Liver Disease: Progression From Nonalcoholic Fatty Liver to Nonalcoholic Steatohepatitis	Sharma M	J Clin Exp Hepatol	2015	10.1016/j.jceh.2015.02.002
26041954	review articles	Gut microbiota: its role in hepatic encephalopathy	Rai R	J Clin Exp Hepatol	2015	10.1016/j.jceh.2014.12.003
32801462	review articles	Epigallocatechin-3-gallate (EGCG) attenuates non-alcoholic fatty liver disease via modulating the interaction between gut microbiota and bile acids	Naito Y	J Clin Biochem Nutr	2020	10.3164/jcbn.20-39
28550272	review articles	Non-alcoholic fatty liver disease--a chronic disease of the 21<sup>st</sup> century	Metrakos P	J Biomed Res	2018	10.7555/JBR.31.20160153
24934596	review articles	Myasthenia Gravis: paradox versus paradigm in autoimmunity	Berrih-Aknin S	J Autoimmun	2014	10.1016/j.jaut.2014.05.001
24075647	review articles	Role of the intestinal microbiome in liver disease	Henao-Mejia J	J Autoimmun	2013	10.1016/j.jaut.2013.07.001
34360773	review articles	Effect of Microbiome on Non-Alcoholic Fatty Liver Disease and the Role of Probiotics, Prebiotics, and Biogenics	Nagashimada M	Int J Mol Sci	2021	10.3390/ijms22158008
34203178	review articles	Intestinal Permeability Is a Mechanical Rheostat in the Pathogenesis of Liver Cirrhosis	Nishimura N	Int J Mol Sci	2021	10.3390/ijms22136921
33503844	review articles	Recent Advances of Microbiome-Associated Metabolomics Profiling in Liver Disease: Principles, Mechanisms, and Applications	Raja G	Int J Mol Sci	2021	10.3390/ijms22031160
32722100	review articles	Liver Cirrhosis and Sarcopenia from the Viewpoint of Dysbiosis	Nishikawa H	Int J Mol Sci	2020	10.3390/ijms21155254
32340286	review articles	Nutrition and Genetics in NAFLD: The Perfect Binomium	Meroni M	Int J Mol Sci	2020	10.3390/ijms21082986
32102237	review articles	Molecular Mechanisms: Connections between Nonalcoholic Fatty Liver Disease, Steatohepatitis and Hepatocellular Carcinoma	Kanda T	Int J Mol Sci	2020	10.3390/ijms21041525
31540133	review articles	Alcohol or Gut Microbiota: Who Is the Guilty?	Meroni M	Int J Mol Sci	2019	10.3390/ijms20184568
27834858	review articles	Impact of Microbes on the Pathogenesis of Primary Biliary Cirrhosis (PBC) and Primary Sclerosing Cholangitis (PSC)	Mattner J	Int J Mol Sci	2016	10.3390/ijms17111864
28627645	review articles	Therapeutic strategies for alcoholic liver disease: Focusing on inflammation and fibrosis (Review)	Kawaratani H	Int J Mol Med	2017	10.3892/ijmm.2017.3015
34069012	review articles	Non-Alcoholic Fatty Liver Disease: Metabolic, Genetic, Epigenetic and Environmental Risk Factors	Juanola O	Int J Environ Res Public Health	2021	10.3390/ijerph18105227
33767591	review articles	Understanding the Effects of Gut Microbiota Dysbiosis on Nonalcoholic Fatty Liver Disease and the Possible Probiotics Role: Recent Updates	Khan A	Int J Biol Sci	2021	10.7150/ijbs.56214
29922669	review articles	Increased Intestinal Permeability and Decreased Barrier Function: Does It Really Influence the Risk of Inflammation?	Fukui H	Inflamm Intest Dis	2016	10.1159/000447252
28603226	review articles	Infections in patients affected by liver cirrhosis: an update	Ascione T	Infez Med	2017
32291578	review articles	Gut microbiota abnormalities, small intestinal bacterial overgrowth, and non-alcoholic fatty liver disease: An emerging paradigm	Ghoshal UC	Indian J Gastroenterol	2020	10.1007/s12664-020-01027-w
32920649	review articles	The role of the gut microbiome in graft fibrosis after pediatric liver transplantation	Qin T	Hum Genet	2021	10.1007/s00439-020-02221-8
33421158	review articles	The Use of Rifaximin in Patients With Cirrhosis	Caraceni P	Hepatology	2021	10.1002/hep.31708
30556145	review articles	Modulation of Insulin Resistance in Nonalcoholic Fatty Liver Disease	Khan RS	Hepatology	2019	10.1002/hep.30429
31840358	review articles	Gut microbiota in non-alcoholic fatty liver disease and alcohol-related liver disease: Current concepts and perspectives	Arab JP	Hepatol Res	2020	10.1111/hepr.13473
26067771	review articles	The gut microbiota of nonalcoholic fatty liver disease: current methods and their interpretation	van Best N	Hepatol Int	2015	10.1007/s12072-015-9640-2
26005677	review articles	Carbohydrate intake and nonalcoholic fatty liver disease: fructose as a weapon of mass destruction	Basaranoglu M	Hepatobiliary Surg Nutr	2015	10.3978/j.issn.2304-3881.2014.11.05
24570901	review articles	Nutrition of the critically ill - emphasis on liver and pancreas	Bengmark S	Hepatobiliary Surg Nutr	2012	10.3978/j.issn.2304-3881.2012.10.14
25100119	review articles	Effects of probiotic therapy on hepatic encephalopathy in patients with liver cirrhosis: an updated meta-analysis of six randomized controlled trials	Xu J	Hepatobiliary Pancreat Dis Int	2014	10.1016/s1499-3872(14)60280-0
30013405	review articles	Management of refractory cirrhotic ascites: challenges and solutions	Fukui H	Hepat Med	2018	10.2147/HMER.S136578
24690956	review articles	The role of microbiota in hepatic encephalopathy	Bajaj JS	Gut Microbes	2014	10.4161/gmic.28684
33071239	review articles	Leaky Gut and Gut-Liver Axis in Liver Cirrhosis: Clinical Studies Update	Fukui H	Gut Liver	2021	10.5009/gnl20032
31554391	review articles	The Role of Intestinal Fungi and Its Metabolites in Chronic Liver Diseases	You N	Gut Liver	2020	10.5009/gnl18579
22570745	review articles	NASH is an Inflammatory Disorder: Pathogenic, Prognostic and Therapeutic Implications	Farrell GC	Gut Liver	2012	10.5009/gnl.2012.6.2.149
33060124	review articles	Targeting the gut-liver-immune axis to treat cirrhosis	Tranah TH	Gut	2021	10.1136/gutjnl-2020-320786
32066623	review articles	Advances in non-invasive assessment of hepatic fibrosis	Loomba R	Gut	2020	10.1136/gutjnl-2018-317593
30171065	review articles	Small metabolites, possible big changes: a microbiota-centered view of non-alcoholic fatty liver disease	Chu H	Gut	2019	10.1136/gutjnl-2018-316307
27802157	review articles	Gut microbiome and liver diseases	Tilg H	Gut	2016	10.1136/gutjnl-2016-312729
33253686	review articles	Chronic Liver Diseases and the Microbiome-Translating Our Knowledge of Gut Microbiota to Management of Chronic Liver Disease	Acharya C	Gastroenterology	2021	10.1053/j.gastro.2020.10.056
32569766	review articles	Contribution of the Intestinal Microbiome and Gut Barrier to Hepatic Disorders	Chopyk DM	Gastroenterology	2020	10.1053/j.gastro.2020.04.077
25447847	review articles	Gut-liver axis in alcoholic liver disease	Szabo G	Gastroenterology	2015	10.1053/j.gastro.2014.10.042
24440671	review articles	Interactions between the intestinal microbiome and liver diseases	Schnabl B	Gastroenterology	2014	10.1053/j.gastro.2014.01.020
27247565	review articles	The Pathogenesis of Nonalcoholic Fatty Liver Disease: Interplay between Diet, Gut Microbiota, and Genetic Background	Yu J	Gastroenterol Res Pract	2016	10.1155/2016/2862173
26839540	review articles	Probiotics and Alcoholic Liver Disease: Treatment and Potential Mechanisms	Li F	Gastroenterol Res Pract	2016	10.1155/2016/5491465
26775042	review articles	Microbiome and bacterial translocation in cirrhosis	Gómez-Hurtado I	Gastroenterol Hepatol	2016	10.1016/j.gastrohep.2015.10.013
28164848	review articles	Gut Microbiota and Complications of Liver Disease	Acharya C	Gastroenterol Clin North Am	2017	10.1016/j.gtc.2016.09.013
34393832	review articles	Bile Acids, Liver Cirrhosis, and Extrahepatic Vascular Dysfunction	Sauerbruch T	Front Physiol	2021	10.3389/fphys.2021.718783
29662454	review articles	The Biological Clock: A Pivotal Hub in Non-alcoholic Fatty Liver Disease Pathogenesis	Mazzoccoli G	Front Physiol	2018	10.3389/fphys.2018.00193
33163393	review articles	The Potential Gut Microbiota-Mediated Treatment Options for Liver Cancer	Zhang C	Front Oncol	2020	10.3389/fonc.2020.524205
34650994	review articles	Molecular and Cellular Mediators of the Gut-Liver Axis in the Progression of Liver Diseases	Bruneau A	Front Med (Lausanne)	2021	10.3389/fmed.2021.725390
34631742	review articles	Novel Anti-inflammatory Treatments in Cirrhosis. A Literature-Based Study	Kronborg TM	Front Med (Lausanne)	2021	10.3389/fmed.2021.718896
33708204	review articles	Toll-Like Receptors Recognize Intestinal Microbes in Liver Cirrhosis	Fan Y	Front Immunol	2021	10.3389/fimmu.2021.608498
30405618	review articles	Adapted Immune Responses of Myeloid-Derived Cells in Fatty Liver Disease	Hundertmark J	Front Immunol	2018	10.3389/fimmu.2018.02418
24904576	review articles	Role of toll-like receptors in immune activation and tolerance in the liver	Nakamoto N	Front Immunol	2014	10.3389/fimmu.2014.00221
34040583	review articles	Gene-Environmental Interactions as Metabolic Drivers of Nonalcoholic Steatohepatitis	Albhaisi S	Front Endocrinol (Lausanne)	2021	10.3389/fendo.2021.665987
31555219	review articles	Gut Dysfunction and Non-alcoholic Fatty Liver Disease	Grabherr F	Front Endocrinol (Lausanne)	2019	10.3389/fendo.2019.00611
28239368	review articles	Connection of Nicotine to Diet-Induced Obesity and Non-Alcoholic Fatty Liver Disease: Cellular and Mechanistic Insights	Sinha-Hikim AP	Front Endocrinol (Lausanne)	2017	10.3389/fendo.2017.00023
33049668	review articles	Current treatment paradigms and emerging therapies for NAFLD/NASH	Raza S	Front Biosci (Landmark Ed)	2021	10.2741/4892
31152791	review articles	Lipidomic biomarkers and mechanisms of lipotoxicity in non-alcoholic fatty liver disease	Svegliati-Baroni G	Free Radic Biol Med	2019	10.1016/j.freeradbiomed.2019.05.029
29485654	review articles	Gut : liver : brain axis: the microbial challenge in the hepatic encephalopathy	Mancini A	Food Funct	2018	10.1039/c7fo01528c
24702768	review articles	Revisiting the metabolic syndrome and paving the way for microRNAs in non-alcoholic fatty liver disease	Ferreira DM	FEBS J	2014	10.1111/febs.12806
30791767	review articles	Gut microbiota: novel therapeutic target for nonalcoholic fatty liver disease	Suk KT	Expert Rev Gastroenterol Hepatol	2019	10.1080/17474124.2019.1569513
29806487	review articles	Bacterial translocation in patients with liver cirrhosis: physiology, clinical consequences, and practical implications	Ponziani FR	Expert Rev Gastroenterol Hepatol	2018	10.1080/17474124.2018.1481747
26799197	review articles	Novel prevention strategies for bacterial infections in cirrhosis	Yan K	Expert Opin Pharmacother	2016	10.1517/14656566.2016.1145663
34017059	review articles	The interaction between the gut microbiota and dietary carbohydrates in nonalcoholic fatty liver disease	Park G	Exp Mol Med	2021	10.1038/s12276-021-00614-x
32797252	review articles	Choline in cystic fibrosis: relations to pancreas insufficiency, enterohepatic cycle, PEMT and intestinal microbiota	Bernhard W	Eur J Nutr	2021	10.1007/s00394-020-02358-2
31009401	review articles	The promising role of probiotic and synbiotic therapy in aminotransferase levels and inflammatory markers in patients with nonalcoholic fatty liver disease - a systematic review and meta-analysis	Khan MY	Eur J Gastroenterol Hepatol	2019	10.1097/MEG.0000000000001371
29200007	review articles	Disruption of the gut-liver axis in the pathogenesis of acute-on-chronic liver failure	Zhang T	Eur J Gastroenterol Hepatol	2018	10.1097/MEG.0000000000001026
32294235	review articles	Macrophages in the pathophysiology of NAFLD: The role of sex differences	Ministrini S	Eur J Clin Invest	2020	10.1111/eci.13236
34779841	review articles	It takes guts to learn: machine learning techniques for disease detection from the gut microbiome	Curry KD	Emerg Top Life Sci	2021	10.1042/ETLS20210213
30591521	review articles	The role of the microbiome in NAFLD and NASH	Kolodziejczyk AA	EMBO Mol Med	2019	10.15252/emmm.201809302
31726747	review articles	Role of Gut Dysbiosis in Liver Diseases: What Have We Learned So Far?	Fukui H	Diseases	2019	10.3390/diseases7040058
29966270	review articles	Gut Microbiome and Cardiovascular Diseases	Yoshida N	Diseases	2018	10.3390/diseases6030056
27832649	review articles	Bile Acids and the Potential Role in Primary Biliary Cirrhosis	Yang H	Digestion	2016	10.1159/000452300
28215516	review articles	AISF position paper on nonalcoholic fatty liver disease (NAFLD): Updates and future directions	Italian Association for the Study of the Liver (AISF)	Dig Liver Dis	2017	10.1016/j.dld.2017.01.147
23280158	review articles	Gut-liver axis and fibrosis in nonalcoholic fatty liver disease: an input for novel therapies	Frasinariu OE	Dig Liver Dis	2013	10.1016/j.dld.2012.11.010
21163715	review articles	Gut microbiota and probiotics in chronic liver diseases	Cesaro C	Dig Liver Dis	2011	10.1016/j.dld.2010.10.015
31768880	review articles	Bacterial Infection in Patients with Cirrhosis: Don't Get Bugged to Death	Cannon MD	Dig Dis Sci	2020	10.1007/s10620-019-05943-6
26898658	review articles	Gut Microbiota of Nonalcoholic Fatty Liver Disease	Abdou RM	Dig Dis Sci	2016	10.1007/s10620-016-4045-1
26641242	review articles	Therapy of Primary Sclerosing Cholangitis--Today and Tomorrow	Halilbasic E	Dig Dis	2015	10.1159/000440827
26912150	review articles	Novel Molecular Mechanisms in the Development of Non-Alcoholic Steatohepatitis	Povero D	Diabetes Metab J	2016	10.4093/dmj.2016.40.1.1
28462693	review articles	Sarcopenia in Patients with Advanced Liver Disease	Ponziani FR	Curr Protein Pept Sci	2018	10.2174/1389203718666170428121647
31670055	review articles	Fibrosis and the intestinal microbiome; a focus on chronic liver disease	Beraza N	Curr Opin Pharmacol	2019	10.1016/j.coph.2019.09.012
24275855	review articles	Contributions of metabolic dysregulation and inflammation to nonalcoholic steatohepatitis, hepatic fibrosis, and cancer	Lade A	Curr Opin Oncol	2014	10.1097/CCO.0000000000000042
30893082	review articles	Updates on the pathophysiology and therapeutic targets for hepatic encephalopathy	Alsahhar JS	Curr Opin Gastroenterol	2019	10.1097/MOG.0000000000000527
28346237	review articles	Current and future pharmacologic treatment of nonalcoholic steatohepatitis	Banini BA	Curr Opin Gastroenterol	2017	10.1097/MOG.0000000000000356
25025262	review articles	Dietary management of hepatic encephalopathy revisited	Amodio P	Curr Opin Clin Nutr Metab Care	2014	10.1097/MCO.0000000000000084
23873346	review articles	The gut-liver axis	Visschers RG	Curr Opin Clin Nutr Metab Care	2013	10.1097/MCO.0b013e32836410a4
18685458	review articles	Gastrointestinal tract in liver disease: which organ is sick?	Norman K	Curr Opin Clin Nutr Metab Care	2008	10.1097/MCO.0b013e32830a70bc
31444636	review articles	Microbial Profiles of Cirrhosis in the Human Small Intestine	Dong TS	Curr Gastroenterol Rep	2019	10.1007/s11894-019-0717-2
32865911	review articles	Role of the Gut Microbiome in Nonalcoholic Fatty Liver Disease Progression	Mungamuri SK	Crit Rev Oncog	2020	10.1615/CritRevOncog.2020035667
34446271	review articles	Emerging and Established Therapeutic Approaches for Nonalcoholic Fatty Liver Disease	Brown E	Clin Ther	2021	10.1016/j.clinthera.2021.07.013
32820802	review articles	Cirrhosis and insulin resistance: current knowledge, pathophysiological mechanisms, complications and potential treatments	Clarembeau F	Clin Sci (Lond)	2020	10.1042/CS20200022
31713023	review articles	Clinical Management of Primary Biliary Cholangitis-Strategies and Evolving Trends	Gao L	Clin Rev Allergy Immunol	2020	10.1007/s12016-019-08772-7
31451247	review articles	Nutritional support in cirrhotic patients with sarcopenia	Vasques J	Clin Nutr ESPEN	2019	10.1016/j.clnesp.2019.07.011
33504138	review articles	Changes in the epidemiology and management of bacterial infections in cirrhosis	Piano S	Clin Mol Hepatol	2021	10.3350/cmh.2020.0329
29268595	review articles	Microbiota, a key player in alcoholic liver disease	Cassard AM	Clin Mol Hepatol	2018	10.3350/cmh.2017.0067
32934044	review articles	Modulating the gut-liver axis and the pivotal role of the faecal microbiome in cirrhosis	Woodhouse C	Clin Med (Lond)	2020	10.7861/clinmed.2020-0676
32620285	review articles	Microbiome: Emerging Concepts in Patients with Chronic Liver Disease	Reuter B	Clin Liver Dis	2020	10.1016/j.cld.2020.04.006
32245525	review articles	Pathophysiology of Hepatic Encephalopathy	Jaffe A	Clin Liver Dis	2020	10.1016/j.cld.2020.01.002
27063268	review articles	Nonalcoholic Fatty Liver Disease and the Gut Microbiome	Boursier J	Clin Liver Dis	2016	10.1016/j.cld.2015.10.012
30099098	review articles	Altered Microbiome in Patients With Cirrhosis and Complications	Acharya C	Clin Gastroenterol Hepatol	2019	10.1016/j.cgh.2018.08.008
30915401	review articles	Small intestinal bacterial overgrowth and nonalcoholic fatty liver disease	Augustyn M	Clin Exp Hepatol	2019	10.5114/ceh.2019.83151
26151226	review articles	Gut-liver axis, nutrition, and non-alcoholic fatty liver disease	Kirpich IA	Clin Biochem	2015	10.1016/j.clinbiochem.2015.06.023
31717860	review articles	The Role of Gut-Derived Microbial Antigens on Liver Fibrosis Initiation and Progression	Chen D	Cells	2019	10.3390/cells8111324
26894897	review articles	Pathogenesis of nonalcoholic steatohepatitis	Liu W	Cell Mol Life Sci	2016	10.1007/s00018-016-2161-x
33203939	review articles	Immunopathobiology and therapeutic targets related to cytokines in liver diseases	He Y	Cell Mol Immunol	2021	10.1038/s41423-020-00580-w
33296678	review articles	Current Concepts, Opportunities, and Challenges of Gut Microbiome-Based Personalized Medicine in Nonalcoholic Fatty Liver Disease	Sharpton SR	Cell Metab	2021	10.1016/j.cmet.2020.11.010
34830997	review articles	Hepatocellular Carcinoma in Non-Alcoholic Fatty Liver Disease: From Epidemiology to Diagnostic Approach	Grgurevic I	Cancers (Basel)	2021	10.3390/cancers13225844
34503151	review articles	Host-Microbiota Interactions in Liver Inflammation and Cancer	Giraud J	Cancers (Basel)	2021	10.3390/cancers13174342
34066064	review articles	The Role of the Microbiome in Liver Cancer	Moreno-Gonzalez M	Cancers (Basel)	2021	10.3390/cancers13102330
33578800	review articles	Inflammatory Mechanisms Underlying Nonalcoholic Steatohepatitis and the Transition to Hepatocellular Carcinoma	Peiseler M	Cancers (Basel)	2021	10.3390/cancers13040730
34979291	review articles	Berberine improves liver injury induced glucose and lipid metabolic disorders via alleviating ER stress of hepatocytes and modulating gut microbiota in mice	Yang L	Bioorg Med Chem	2021	10.1016/j.bmc.2021.116598
35053205	review articles	Understanding the Role of the Gut Microbiome and Microbial Metabolites in Non-Alcoholic Fatty Liver Disease: Current Evidence and Perspectives	Vallianou N	Biomolecules	2021	10.3390/biom12010056
26751488	review articles	Alcoholic Liver Disease: Update on the Role of Dietary Fat	Kirpich IA	Biomolecules	2016	10.3390/biom6010001
33546191	review articles	Insights into the Impact of Microbiota in the Treatment of NAFLD/NASH and Its Potential as a Biomarker for Prognosis and Diagnosis	Plaza-Díaz J	Biomedicines	2021	10.3390/biomedicines9020145
33485064	review articles	Crosstalk between PPARs and gut microbiota in NAFLD	Wu L	Biomed Pharmacother	2021	10.1016/j.biopha.2021.111255
30444134	review articles	How our understanding of the microbiome has changed the way we look at liver diseases	Adolph TE	Biomark Med	2018	10.2217/bmm-2018-0266
27048904	review articles	Intestinal microbiota in liver disease	Haque TR	Best Pract Res Clin Gastroenterol	2016	10.1016/j.bpg.2016.02.004
28698093	review articles	Bile acids and intestinal microbiota in autoimmune cholestatic liver diseases	Li Y	Autoimmun Rev	2017	10.1016/j.autrev.2017.07.002
25315744	review articles	The intestinal microbiota and microenvironment in liver	Ma HD	Autoimmun Rev	2015	10.1016/j.autrev.2014.10.013
27995280	review articles	Dietary fructose as a risk factor for non-alcoholic fatty liver disease (NAFLD)	Alwahsh SM	Arch Toxicol	2017	10.1007/s00204-016-1892-7
33334622	review articles	Epidemiology, Pathogenesis, Diagnosis and Emerging Treatment of Nonalcoholic Fatty Liver Disease	Makri E	Arch Med Res	2021	10.1016/j.arcmed.2020.11.010
31910634	review articles	Fecal Microbiota in Non-Alcoholic Fatty Liver Disease and Non-Alcoholic Steatohepatitis: A Systematic Review	Mohammadi Z	Arch Iran Med	2020
33832318	review articles	Traditional Chinese medicine, liver fibrosis, intestinal flora: is there any connection?-a narrative review	Liu YT	Ann Palliat Med	2021	10.21037/apm-20-2129
31771820	review articles	Multiple therapeutic targets in rare cholestatic liver diseases: Time to redefine treatment strategies	Gerussi A	Ann Hepatol	2020	10.1016/j.aohep.2019.09.009
25864208	review articles	Obesity as a cause of hepatocellular carcinoma	Kew MC	Ann Hepatol	2015
25152979	review articles	Probiotics and synbiotics may improve liver aminotransferases levels in non-alcoholic fatty liver disease patients	Buss C	Ann Hepatol	2014
34105986	review articles	Synapomorphic features of hepatic and pulmonary vasculatures include comparable purinergic signaling responses in host defense and modulation of inflammation	Hanidziar D	Am J Physiol Gastrointest Liver Physiol	2021	10.1152/ajpgi.00406.2020
32146836	review articles	A story of liver and gut microbes: how does the intestinal flora affect liver disease? A review of the literature	Giuffrè M	Am J Physiol Gastrointest Liver Physiol	2020	10.1152/ajpgi.00161.2019
26416191	review articles	Clinical and pathophysiological consequences of alterations in the microbiome in cirrhosis	Macnaughtan J	Am J Gastroenterol	2015	10.1038/ajg.2015.313
29083037	review articles	Review article: the gut microbiome as a therapeutic target in the pathogenesis and treatment of chronic liver disease	Woodhouse CA	Aliment Pharmacol Ther	2018	10.1111/apt.14397
24612332	review articles	Review article: fungal microbiota and digestive diseases	Wang ZK	Aliment Pharmacol Ther	2014	10.1111/apt.12665
29417604	review articles	Effects of Alcohol on the Brain in Cirrhosis: Beyond Hepatic Encephalopathy	Davis BC	Alcohol Clin Exp Res	2018	10.1111/acer.13605
33829368	review articles	Perspectives on Precision Medicine Approaches to NAFLD Diagnosis and Management	Lonardo A	Adv Ther	2021	10.1007/s12325-021-01690-1
23881723	review articles	Targeting the gut-liver axis in cirrhosis: antibiotics and non-selective β-blockers	Madsen BS	Adv Ther	2013	10.1007/s12325-013-0044-1
27709011	review articles	Exposure to inorganic arsenic can lead to gut microbe perturbations and hepatocellular carcinoma	Choiniere J	Acta Pharm Sin B	2016	10.1016/j.apsb.2016.07.011
26579442	review articles	Role of farnesoid X receptor and bile acids in alcoholic liver disease	Manley S	Acta Pharm Sin B	2015	10.1016/j.apsb.2014.12.011
33639698	review articles	Fecal microbiota transplantation in hepatic encephalopathy : a review of the current evidence and future perspectives	Afecto E	Acta Gastroenterol Belg	2021	10.51821/84.1.884
30519965	review articles	A round trip from nonalcoholic fatty liver disease to diabetes: molecular targets to the rescue?	Lonardo A	Acta Diabetol	2019	10.1007/s00592-018-1266-0
34904027	review articles	Fatty acid metabolism and acyl-CoA synthetases in the liver-gut axis	Ma Y	World J Hepatol	2021	10.4254/wjh.v13.i11.1512
34853639	review articles	Gut microbiota and immune system in liver cancer: Promising therapeutic implication from development to treatment	Bartolini I	World J Gastrointest Oncol	2021	10.4251/wjgo.v13.i11.1616
34040698	review articles	Biomarkers for hepatocellular carcinoma based on body fluids and feces	Guan MC	World J Gastrointest Oncol	2021	10.4251/wjgo.v13.i5.351
32684733	review articles	Potential of the ellagic acid-derived gut microbiota metabolite - Urolithin A in gastrointestinal protection	Kujawska M	World J Gastroenterol	2020	10.3748/wjg.v26.i23.3170
30479462	review articles	Gut microbiota in common elderly diseases affecting activities of daily living	Shimizu Y	World J Gastroenterol	2018	10.3748/wjg.v24.i42.4750
34479345	review articles	[The role of intestinal microbiota in the development of non-alcoholic fatty liver disease]	Tumani MF	Rev Med Chil	2021	10.4067/s0034-98872021000400570
32797354	review articles	Gut microbiota alterations are distinct for primary colorectal cancer and hepatocellular carcinoma	Jia W	Protein Cell	2021	10.1007/s13238-020-00748-0
33493657	review articles	Baicalin and the liver-gut system: Pharmacological bases explaining its therapeutic effects	Hu Q	Pharmacol Res	2021	10.1016/j.phrs.2021.105444
34206200	review articles	Clinical Aspects of Gut Microbiota in Hepatocellular Carcinoma Management	Xu J	Pathogens	2021	10.3390/pathogens10070782
27287838	review articles	[Non-alcoholic fatty liver disease and hepatocellular carcinoma - 2016]	Pár A	Orv Hetil	2016	10.1556/650.2016.30425
29707157	review articles	Microbiota effects on cancer: from risks to therapies	Rea D	Oncotarget	2018	10.18632/oncotarget.24681
25744638	review articles	[Cellular senescence and chronic inflammation]	Ohtani N	Nihon Rinsho Meneki Gakkai Kaishi	2014	10.2177/jsci.37.390
33568795	review articles	The role of farnesoid X receptor in metabolic diseases, and gastrointestinal and liver cancer	Sun L	Nat Rev Gastroenterol Hepatol	2021	10.1038/s41575-020-00404-2
28676707	review articles	The gut microbiome and liver cancer: mechanisms and clinical translation	Yu LX	Nat Rev Gastroenterol Hepatol	2017	10.1038/nrgastro.2017.72
31060311	review articles	Role of Gut Microbiota in Hepatocarcinogenesis	Gupta H	Microorganisms	2019	10.3390/microorganisms7050121
30445141	review articles	Obesity and cancer risk: Emerging biological mechanisms and perspectives	Avgerinos KI	Metabolism	2019	10.1016/j.metabol.2018.11.001
32564483	review articles	The Microbiome and Hepatocellular Carcinoma	Rattan P	Liver Transpl	2020	10.1002/lt.25828
24355793	review articles	Influence of dietary fat on intestinal microbes, inflammation, barrier function and metabolic outcomes	Shen W	J Nutr Biochem	2014	10.1016/j.jnutbio.2013.09.009
27902422	review articles	Microbiota dysbiosis: a new piece in the understanding of the carcinogenesis puzzle	García-Castillo V	J Med Microbiol	2016	10.1099/jmm.0.000371
34595140	review articles	Current Landscape and Future Directions of Biomarkers for Immunotherapy in Hepatocellular Carcinoma	Gok Yavuz B	J Hepatocell Carcinoma	2021	10.2147/JHC.S322289
33604315	review articles	Mechanisms Underlying Hepatocellular Carcinoma Progression in Patients with Type 2 Diabetes	Shi T	J Hepatocell Carcinoma	2021	10.2147/JHC.S274933
33400276	review articles	Emerging role of RNF2 in cancer: From bench to bedside	Yan Q	J Cell Physiol	2021	10.1002/jcp.30260
34360566	review articles	Hepatocellular Carcinoma Immunotherapy and the Potential Influence of Gut Microbiome	Temraz S	Int J Mol Sci	2021	10.3390/ijms22157800
31426291	review articles	Antioxidant Versus Pro-Apoptotic Effects of Mushroom-Enriched Diets on Mitochondria in Liver Disease	Fontes A	Int J Mol Sci	2019	10.3390/ijms20163987
27187365	review articles	Non-Alcoholic Fatty Liver Disease and Extra-Hepatic Cancers	Sanna C	Int J Mol Sci	2016	10.3390/ijms17050717
32564086	review articles	The impact of metabolites derived from the gut microbiota on immune regulation and diseases	Ohno H	Int Immunol	2020	10.1093/intimm/dxaa041
33188512	review articles	Current perspectives on the tumor microenvironment in hepatocellular carcinoma	Santhakumar C	Hepatol Int	2020	10.1007/s12072-020-10104-3
29531939	review articles	Targeting gut microbiota in hepatocellular carcinoma: probiotics as a novel therapy	Wan MLY	Hepatobiliary Surg Nutr	2018	10.21037/hbsn.2017.12.07
30173786	review articles	Compromised nutritional status in patients with end-stage liver disease: Role of gut microbiota	Vasco M	Hepatobiliary Pancreat Dis Int	2018	10.1016/j.hbpd.2018.06.004
29325602	review articles	Bile Acid Metabolism in Liver Pathobiology	Chiang JYL	Gene Expr	2018	10.3727/105221618X15156018385515
34178698	review articles	Editorial: Immunotherapy in Hepatocellular Carcinoma	Li B	Front Oncol	2021	10.3389/fonc.2021.698515
29515527	review articles	Gut Microbiota: An Integral Moderator in Health and Disease	Feng Q	Front Microbiol	2018	10.3389/fmicb.2018.00151
30002656	review articles	Biomarkers for Clinical Benefit of Immune Checkpoint Inhibitor Treatment-A Review From the Melanoma Perspective and Beyond	Buder-Bakhaya K	Front Immunol	2018	10.3389/fimmu.2018.01474
33897617	review articles	Mining Gut Microbiota From Bariatric Surgery for MAFLD	Wu WK	Front Endocrinol (Lausanne)	2021	10.3389/fendo.2021.612946
29535978	review articles	Mycotoxin: Its Impact on Gut Health and Microbiota	Liew WP	Front Cell Infect Microbiol	2018	10.3389/fcimb.2018.00060
28857485	review articles	Nonalcoholic fatty liver disease promotes hepatocellular carcinoma through direct and indirect effects on hepatocytes	Ma C	FEBS J	2018	10.1111/febs.14209
32299261	review articles	Sarcopenia in chronic liver diseases: a translational overview	Barbero-Becerra VJ	Expert Rev Gastroenterol Hepatol	2020	10.1080/17474124.2020.1757427
30173562	review articles	Fecal microbiota transplantation: a promising strategy in preventing the progression of non-alcoholic steatohepatitis and improving the anti-cancer immune response	Delaune V	Expert Opin Biol Ther	2018	10.1080/14712598.2018.1518424
34919227	review articles	The potential of gut microbiome as a non-invasive predictive biomarker for early detection of pancreatic cancer and hepatocellular carcinoma	Kaźmierczak-Siedlecka K	Eur Rev Med Pharmacol Sci	2021	10.26355/eurrev_202112_27421
32556990	review articles	LINC01133: an emerging tumor-associated long non-coding RNA in tumor and osteosarcoma	Li Z	Environ Sci Pollut Res Int	2020	10.1007/s11356-020-09631-1
33901779	review articles	Dysregulation of autophagy acts as a pathogenic mechanism of non-alcoholic fatty liver disease (NAFLD) induced by common environmental pollutants	Zhang Y	Ecotoxicol Environ Saf	2021	10.1016/j.ecoenv.2021.112256
25484575	review articles	Leptin signaling molecular actions and drug target in hepatocellular carcinoma	Jiang N	Drug Des Devel Ther	2014	10.2147/DDDT.S69004
28972878	review articles	Role of nutrition, gene polymorphism, and gut microbiota in non-alcoholic fatty liver disease	Kong L	Discov Med	2017
26045268	review articles	Relationship between Obesity, Gut Microbiome and Hepatocellular Carcinoma Development	Hara E	Dig Dis	2015	10.1159/000371679
29701490	review articles	Influence of gut microbiota and intestinal barrier on enterogenic infection after liver transplantation	Mu J	Curr Med Res Opin	2019	10.1080/03007995.2018.1470085
28290049	review articles	Type 2 Diabetes and Hepatocellular Carcinoma: Risk Factors and Pathogenesis	Wainwright P	Curr Diab Rep	2017	10.1007/s11892-017-0851-x
28426878	review articles	Microbiota, NASH, HCC and the potential role of probiotics	Brandi G	Carcinogenesis	2017	10.1093/carcin/bgx007
34638308	review articles	The Gut Microbiome and Cancer Immunotherapy: Can We Use the Gut Microbiome as a Predictive Biomarker for Clinical Response in Cancer Immunotherapy?	Oh B	Cancers (Basel)	2021	10.3390/cancers13194824
34298687	review articles	Abnormal Metabolism in the Progression of Nonalcoholic Fatty Liver Disease to Hepatocellular Carcinoma: Mechanistic Insights to Chemoprevention	Orabi D	Cancers (Basel)	2021	10.3390/cancers13143473
32443737	review articles	Molecular Mechanisms Regulating Obesity-Associated Hepatocellular Carcinoma	Rajesh Y	Cancers (Basel)	2020	10.3390/cancers12051290
31694274	review articles	Carcinogenesis and Metastasis in Liver: Cell Physiological Basis	Rossetto A	Cancers (Basel)	2019	10.3390/cancers11111731
31917160	review articles	Gut microbiota: A new piece in understanding hepatocarcinogenesis	Zhou A	Cancer Lett	2020	10.1016/j.canlet.2020.01.002
31185249	review articles	New insights and therapeutic implication of gut microbiota in non-alcoholic fatty liver disease and its associated liver cancer	Ezzaidi N	Cancer Lett	2019	10.1016/j.canlet.2019.114425
28527946	review articles	The microbiome and hepatobiliary-pancreatic cancers	Mima K	Cancer Lett	2017	10.1016/j.canlet.2017.05.001
28573132	review articles	Prebiotics: A Novel Approach to Treat Hepatocellular Carcinoma	Fatima N	Can J Gastroenterol Hepatol	2017	10.1155/2017/6238106
26343741	review articles	Alcoholic Liver Disease: Role of Cytokines	Neuman MG	Biomolecules	2015	10.3390/biom5032023
34944709	review articles	Diet and Gut Microbiota Interaction-Derived Metabolites and Intrahepatic Immune Response in NAFLD Development and Treatment	Yang M	Biomedicines	2021	10.3390/biomedicines9121893
33297335	review articles	Biomarkers in Hepatocellular Carcinoma: Current Status and Future Perspectives	Pan Y	Biomedicines	2020	10.3390/biomedicines8120576
25194178	review articles	Mechanisms behind the link between obesity and gastrointestinal cancers	Tilg H	Best Pract Res Clin Gastroenterol	2014	10.1016/j.bpg.2014.07.006
26772409	review articles	Bile Acid Modifications at the Microbe-Host Interface: Potential for Nutraceutical and Pharmaceutical Interventions in Host Health	Joyce SA	Annu Rev Food Sci Technol	2016	10.1146/annurev-food-041715-033159
34094657	review articles	The role of liver sinusoidal endothelial cells in cancer liver metastasis	Yang M	Am J Cancer Res	2021
33042631	review articles	Recent progress in treatment of hepatocellular carcinoma	Chen Z	Am J Cancer Res	2020
33579428	review articles	Signaling pathways in hepatocellular carcinoma	Garcia-Lezana T	Adv Cancer Res	2021	10.1016/bs.acr.2020.10.002
33579424	review articles	Atypical immunometabolism and metabolic reprogramming in liver cancer: Deciphering the role of gut microbiome	Golonka RM	Adv Cancer Res	2021	10.1016/bs.acr.2020.10.004
34696531	other hepatitis virus	Prolonged Gut Dysbiosis and Fecal Excretion of Hepatitis A Virus in Patients Infected with Human Immunodeficiency Virus	Ishizaka A	Viruses	2021	10.3390/v13102101
25864882	other hepatitis virus	Who determines the outcomes of HBV exposure?	Wang B	Trends Microbiol	2015	10.1016/j.tim.2015.04.001
33501810	other hepatitis virus	[Correlation between gut microbiota and liver biochemical indicators in patients with chronic hepatitis B]	Zhao Z	Sheng Wu Gong Cheng Xue Bao	2021	10.13345/j.cjb.200279
34876650	other hepatitis virus	Changes in the gut microbiota after hepatitis C virus eradication	Honda T	Sci Rep	2021	10.1038/s41598-021-03009-0
31361979	other hepatitis virus	The impact of proton pump inhibitors on the intestinal microbiota in chronic hepatitis C patients	Wellhöner F	Scand J Gastroenterol	2019	10.1080/00365521.2019.1647280
25646429	other hepatitis virus	Age-related immune clearance of hepatitis B virus infection requires the establishment of gut microbiota	Chou HH	Proc Natl Acad Sci U S A	2015	10.1073/pnas.1424775112
23785287	other hepatitis virus	Identification of a novel antimicrobial peptide from human hepatitis B virus core protein arginine-rich domain (ARD)	Chen HL	PLoS Pathog	2013	10.1371/journal.ppat.1003425
34577631	other hepatitis virus	Pilot Sub-Study of the Effect of Hepatitis C Cure by Glecaprevir/Pibrentasvir on the Gut Microbiome of Patients with Chronic Hepatitis C Genotypes 1 to 6 in the Mythen Study	Yilmaz B	Pharmaceuticals (Basel)	2021	10.3390/ph14090931
31304190	other hepatitis virus	High Kynurenine:Tryptophan Ratio Is Associated With Liver Fibrosis in HIV-Monoinfected and HIV/Hepatitis C Virus-Coinfected Women	Kardashian A	Open Forum Infect Dis	2019	10.1093/ofid/ofz281
33051377	other hepatitis virus	Reduced Independence in Daily Living Is Associated with the Gut Microbiome in People with HIV and HCV	Taylor BC	mSystems	2020	10.1128/mSystems.00528-20
34296287	other hepatitis virus	Effect of intestinal microbiota imbalance associated with chronic hepatitis B virus infection on the expression of microRNA‑192 and GLP‑1	Liu Y	Mol Med Rep	2021	10.3892/mmr.2021.12301
21814872	other hepatitis virus	Changes of fecal Bifidobacterium species in adult patients with hepatitis B virus-induced chronic liver disease	Xu M	Microb Ecol	2012	10.1007/s00248-011-9925-5
21286703	other hepatitis virus	Intestinal microbiota was assessed in cirrhotic patients with hepatitis B virus infection. Intestinal microbiota of HBV cirrhotic patients	Lu H	Microb Ecol	2011	10.1007/s00248-010-9801-8
26645150	other hepatitis virus	Stool vs. Serum Hepatitis B Virus DNA in Patients with Chronic Hepatitis B	Zheng JS	Med Sci Monit	2015	10.12659/msm.896243
28561276	other hepatitis virus	Intestinal microbiota in patients with chronic hepatitis C with and without cirrhosis compared with healthy controls	Heidrich B	Liver Int	2018	10.1111/liv.13485
32500937	other hepatitis virus	Altered faecal microbiota on the expression of Th cells responses in the exacerbation of patients with hepatitis E infection	Wu J	J Viral Hepat	2020	10.1111/jvh.13344
31600845	other hepatitis virus	Gut microbiota dysbiosis in patients with hepatitis B virus-induced chronic liver disease covering chronic hepatitis, liver cirrhosis and hepatocellular carcinoma	Zeng Y	J Viral Hepat	2020	10.1111/jvh.13216
29806520	other hepatitis virus	Role of probiotics in the treatment of minimal hepatic encephalopathy in patients with HBV-induced liver cirrhosis	Xia X	J Int Med Res	2018	10.1177/0300060518776064
33598686	other hepatitis virus	Improvement of Gut Diversity and Composition After Direct-Acting Antivirals in Hepatitis C Virus-Infected Patients With or Without Human Immunodeficiency Virus Coinfection	Chuaypen N	J Infect Dis	2021	10.1093/infdis/jiab094
32744764	other hepatitis virus	The relationship between oral-origin bacteria in the fecal microbiome and albumin-bilirubin grade in patients with hepatitis C	Yamamoto K	J Gastroenterol Hepatol	2021	10.1111/jgh.15206
32406072	other hepatitis virus	Prediagnostic concentrations of circulating bile acids and hepatocellular carcinoma risk: REVEAL-HBV and HCV studies	Petrick JL	Int J Cancer	2020	10.1002/ijc.33051
33675101	other hepatitis virus	Letter to the Editor: Restructuring the Gut Microbiota of Patients with Cirrhosis After HCV Eradication: A Matter of Time?	Ponziani FR	Hepatology	2021	10.1002/hep.31784
33411981	other hepatitis virus	Eradication of Chronic HCV Infection: Improvement of Dysbiosis Only in Patients Without Liver Cirrhosis	Wellhöner F	Hepatology	2021	10.1002/hep.31700
27625705	other hepatitis virus	Gut microbiome alterations in patients with stage 4 hepatitis C	Aly AM	Gut Pathog	2016	10.1186/s13099-016-0124-2
31915238	other hepatitis virus	Hepatitis E virus finds its path through the gut	Oechslin N	Gut	2020	10.1136/gutjnl-2019-320206
31221551	other hepatitis virus	Short-term effects of direct-acting antiviral agents on inflammation and gut microbiota in hepatitis C-infected patients	Pérez-Matute P	Eur J Intern Med	2019	10.1016/j.ejim.2019.06.005
33208683	other hepatitis virus	The diagnostic potential of gut microbiome for early hepatitis B virus-related hepatocellular carcinoma	Tang Y	Eur J Gastroenterol Hepatol	2021	10.1097/MEG.0000000000001978
31485278	other hepatitis virus	Serum Zonulin in HBV-Associated Chronic Hepatitis, Liver Cirrhosis, and Hepatocellular Carcinoma	Wang X	Dis Markers	2019	10.1155/2019/5945721
32279172	other hepatitis virus	Fecal Microbiota Transplantation in Hepatitis B e Antigen-Positive Chronic Hepatitis B Patients: A Pilot Study	Chauhan A	Dig Dis Sci	2021	10.1007/s10620-020-06246-x
29718124	other hepatitis virus	Gut Dysbiosis Associated With Hepatitis C Virus Infection	Inoue T	Clin Infect Dis	2018	10.1093/cid/ciy205
33186134	other hepatitis virus	The role of intestinal microbiota, bile acids, and Th17/IL17 axis in hepatitis B virus-related liver fibrosis	Chen YF	Chin Med J (Engl)	2020	10.1097/CM9.0000000000001199
30488623	other hepatitis virus	Editorial: direct anti-viral agents, hepatitis C virus eradication, and gut-liver axis-another mechanistic piece to the puzzle	Tariq R	Aliment Pharmacol Ther	2018	10.1111/apt.15047
30345704	other hepatitis virus	Influence of hepatitis C virus eradication with direct-acting antivirals on the gut microbiota in patients with cirrhosis	Ponziani FR	Aliment Pharmacol Ther	2018	10.1111/apt.15004
27417456	other hepatitis virus	HCV eradication does not impact gut dysbiosis or systemic inflammation in cirrhotic patients	Bajaj JS	Aliment Pharmacol Ther	2016	10.1111/apt.13732
33119247	other hepatitis virus	Alterations of the Treatment-Naive Gut Microbiome in Newly Diagnosed Hepatitis C Virus Infection	Sultan S	ACS Infect Dis	2021	10.1021/acsinfecdis.0c00432
30386344	other diseases	Peripheral Dopamine Controlled by Gut Microbes Inhibits Invariant Natural Killer T Cell-Mediated Hepatitis	Xue R	Front Immunol	2018	10.3389/fimmu.2018.02398
31550826	other diseases	[Efficacy analysis of fecal microbiota transplantation in the treatment of 2010 patients with intestinal disorders]	Li N	Zhonghua Wei Chang Wai Ke Za Zhi	2019	10.3760/cma.j.issn.1671-0274.2019.09.011
31357787	other diseases	[Research advances of sarcopenia in chronic liver disease]	Xiao HJ	Zhonghua Gan Zang Bing Za Zhi	2019	10.3760/cma.j.issn.1007-3418.2019.07.018
34876793	other diseases	Gut microbiome composition can predict the response to nivolumab in advanced hepatocellular carcinoma patients	Chung MW	World J Gastroenterol	2021	10.3748/wjg.v27.i42.7340
20399709	other diseases	Infection, inflammation, and chronic diseases: consequences of a modern lifestyle	Ehlers S	Trends Immunol	2010	10.1016/j.it.2010.02.003
27496472	other diseases	Profile of Gut Microbiota Associated With the Presence of Hepatocellular Cancer in Patients With Liver Cirrhosis	Grąt M	Transplant Proc	2016	10.1016/j.transproceed.2016.01.077
34051218	other diseases	Gut microbiome-host interactions in driving environmental pollutant trichloroethene-mediated autoimmunity	Wang H	Toxicol Appl Pharmacol	2021	10.1016/j.taap.2021.115597
34012007	other diseases	Profiling of tumour-associated microbiota in human hepatocellular carcinoma	Komiyama S	Sci Rep	2021	10.1038/s41598-021-89963-1
32066758	other diseases	A Microbial Signature Identifies Advanced Fibrosis in Patients with Chronic Liver Disease Mainly Due to NAFLD	Dong TS	Sci Rep	2020	10.1038/s41598-020-59535-w
29795295	other diseases	Impact of the griffithsin anti-HIV microbicide and placebo gels on the rectal mucosal proteome and microbiome in non-human primates	Girard L	Sci Rep	2018	10.1038/s41598-018-26313-8
25435303	other diseases	Natural killer T cells play a necessary role in modulating of immune-mediated liver injury by gut microbiota	Chen J	Sci Rep	2014	10.1038/srep07259
30662163	other diseases	The diabetes pandemic and associated infections: suggestions for clinical microbiology	Toniolo A	Rev Med Microbiol	2019	10.1097/MRM.0000000000000155
32735609	other diseases	Roux-en-Y gastric bypass surgery changes fungal and bacterial microbiota in morbidly obese patients-A pilot study	Steinert RE	PLoS One	2020	10.1371/journal.pone.0236936
32275691	other diseases	Regulatory effects of Lactobacillus plantarum HY7714 on skin health by improving intestinal condition	Nam B	PLoS One	2020	10.1371/journal.pone.0231268
32267892	other diseases	A combination of monosodium glutamate and high-fat and high-fructose diets increases the risk of kidney injury, gut dysbiosis and host-microbial co-metabolism	Pongking T	PLoS One	2020	10.1371/journal.pone.0231237
29969462	other diseases	Dysbiosis of oral microbiota and its association with salivary immunological biomarkers in autoimmune liver disease	Abe K	PLoS One	2018	10.1371/journal.pone.0198757
34062240	other diseases	Saponins isolated from Radix polygalae extent lifespan by modulating complement C3 and gut microbiota	Zeng W	Pharmacol Res	2021	10.1016/j.phrs.2021.105697
30674610	other diseases	Bifidobacterium Abundance in Early Infancy and Vaccine Response at 2 Years of Age	Huda MN	Pediatrics	2019	10.1542/peds.2018-1489
25002669	other diseases	Stool microbiota and vaccine responses of infants	Huda MN	Pediatrics	2014	10.1542/peds.2013-3937
33808476	other diseases	Adherence to a Supplemented Mediterranean Diet Drives Changes in the Gut Microbiota of HIV-1-Infected Individuals	Pastor-Ibáñez R	Nutrients	2021	10.3390/nu13041141
25951129	other diseases	Can skin exposure to sunlight prevent liver inflammation?	Gorman S	Nutrients	2015	10.3390/nu7053219
29018272	other diseases	Bile acid-microbiota crosstalk in gastrointestinal inflammation and carcinogenesis	Jia W	Nat Rev Gastroenterol Hepatol	2018	10.1038/nrgastro.2017.119
33707780	other diseases	Fibroblastic reticular cell lineage convergence in Peyer's patches governs intestinal immunity	Prados A	Nat Immunol	2021	10.1038/s41590-021-00894-5
24777532	other diseases	The epigenetic regulator Uhrf1 facilitates the proliferation and maturation of colonic regulatory T cells	Obata Y	Nat Immunol	2014	10.1038/ni.2886
35121877	other diseases	Chronic liver disease enables gut Enterococcus faecalis colonization to promote liver carcinogenesis	Iida N	Nat Cancer	2021	10.1038/s43018-021-00251-3
12715941	other diseases	Intestinal candidiasis. A clinical report and comments about this opportunistic pathology	Ruiz-Sánchez D	Mycopathologia	2002	10.1023/a:1021326713470
34427525	other diseases	Horizontal Gene Transfer Is the Main Driver of Antimicrobial Resistance in Broiler Chicks Infected with Salmonella enterica Serovar Heidelberg	Oladeinde A	mSystems	2021	10.1128/mSystems.00729-21
33952659	other diseases	HIV-1 Infection Alters the Viral Composition of Plasma in Men Who Have Sex with Men	Liu K	mSphere	2021	10.1128/mSphere.00081-21
33369019	other diseases	Flexibility of Gut Microbiota in Ageing Individuals during Dietary Fiber Long-Chain Inulin Intake	Kiewiet MBG	Mol Nutr Food Res	2021	10.1002/mnfr.202000390
32526796	other diseases	Dietary Fiber from Oat and Rye Brans Ameliorate Western Diet-Induced Body Weight Gain and Hepatic Inflammation by the Modulation of Short-Chain Fatty Acids, Bile Acids, and Tryptophan Metabolism	Kundi ZM	Mol Nutr Food Res	2021	10.1002/mnfr.201900580
26990039	other diseases	Rhubarb extract prevents hepatic inflammation induced by acute alcohol intake, an effect related to the modulation of the gut microbiota	Neyrinck AM	Mol Nutr Food Res	2017	10.1002/mnfr.201500899
33793160	other diseases	Implications of gut microbiota in autoimmune liver diseases	Qian Q	Minerva Gastroenterol (Torino)	2021	10.23736/S2724-5985.21.02860-9
34946123	other diseases	Microorganisms as Shapers of Human Civilization, from Pandemics to Even Our Genomes: Villains or Friends? A Historical Approach	Rodríguez-Frías F	Microorganisms	2021	10.3390/microorganisms9122518
32640728	other diseases	Autoimmune Hepatitis: Shifts in Gut Microbiota and Metabolic Pathways among Egyptian Patients	Elsherbiny NM	Microorganisms	2020	10.3390/microorganisms8071011
24060485	other diseases	Can non-selective beta-blockers prevent hepatocellular carcinoma in patients with cirrhosis?	Thiele M	Med Hypotheses	2013	10.1016/j.mehy.2013.08.026
31751317	other diseases	Microbial functional change is linked with clinical outcomes after capsular fecal transplant in cirrhosis	Bajaj JS	JCI Insight	2019	10.1172/jci.insight.133410
29925685	other diseases	Intestinal barrier regulates immune responses in the liver via IL-10-producing macrophages	Taniki N	JCI Insight	2018	10.1172/jci.insight.91980
31808596	other diseases	The intestinal microbiome potentially affects thrombin generation in human subjects	Mohammed Y	J Thromb Haemost	2020	10.1111/jth.14699
28892150	other diseases	Hepatic inflammation caused by dysregulated bile acid synthesis is reversible by butyrate supplementation	Sheng L	J Pathol	2017	10.1002/path.4983
21613452	other diseases	A specific prebiotic mixture added to starting infant formula has long-lasting bifidogenic effects	Salvini F	J Nutr	2011	10.3945/jn.110.136747
33275473	other diseases	Pathogenesis of liver injury in Takayasu arteritis: advanced understanding leads to new horizons	Kang K	J Int Med Res	2020	10.1177/0300060520972222
31886312	other diseases	Autoimmune Hepatitis-Immunologically Triggered Liver Pathogenesis-Diagnostic and Therapeutic Strategies	Sucher E	J Immunol Res	2019	10.1155/2019/9437043
32274349	other diseases	Modulating the Intestinal Microbiota: Therapeutic Opportunities in Liver Disease	Philips CA	J Clin Transl Hepatol	2020	10.14218/JCTH.2019.00035
33171747	other diseases	The Gut Barrier, Intestinal Microbiota, and Liver Disease: Molecular Mechanisms and Strategies to Manage	Plaza-Díaz J	Int J Mol Sci	2020	10.3390/ijms21218351
32823659	other diseases	Gut-Pancreas-Liver Axis as a Target for Treatment of NAFLD/NASH	Svegliati-Baroni G	Int J Mol Sci	2020	10.3390/ijms21165820
32323426	other diseases	Omics-derived hepatocellular carcinoma risk biomarkers for precision care of chronic liver diseases	Fujiwara N	Hepatol Res	2020	10.1111/hepr.13506
34346283	other diseases	Distinct gut microbial compositional and functional changes associated with impaired inhibitory control in patients with cirrhosis	Bajaj JS	Gut Microbes	2021	10.1080/19490976.2021.1953247
31201284	other diseases	Alterations of gut microbiome in autoimmune hepatitis	Wei Y	Gut	2020	10.1136/gutjnl-2018-317836
33152356	other diseases	CRIg(+) Macrophages Prevent Gut Microbial DNA-Containing Extracellular Vesicle-Induced Tissue Inflammation and Insulin Resistance	Luo Z	Gastroenterology	2021	10.1053/j.gastro.2020.10.042
29454797	other diseases	Alterations in Intestinal Microbiota Lead to Production of Interleukin 17 by Intrahepatic γδ T-Cell Receptor-Positive Cells and Pathogenesis of Cholestatic Liver Disease	Tedesco D	Gastroenterology	2018	10.1053/j.gastro.2018.02.019
32595504	other diseases	Hydrogen: An Endogenous Regulator of Liver Homeostasis	Zhang Y	Front Pharmacol	2020	10.3389/fphar.2020.00877
34149682	other diseases	Invasive Group B Streptococcus Disease With Recurrence and in Multiples: Towards a Better Understanding of GBS Late-Onset Sepsis	Freudenhammer M	Front Immunol	2021	10.3389/fimmu.2021.617925
33841420	other diseases	Depletion of Gut Microbiota Impairs Gut Barrier Function and Antiviral Immune Defense in the Liver	Guo W	Front Immunol	2021	10.3389/fimmu.2021.636803
33841405	other diseases	Leaky Gut Driven by Dysbiosis Augments Activation and Accumulation of Liver Macrophages via RIP3 Signaling Pathway in Autoimmune Hepatitis	Zhang H	Front Immunol	2021	10.3389/fimmu.2021.624360
33123141	other diseases	Bifidobacterium animalis ssp. Lactis 420 Mitigates Autoimmune Hepatitis Through Regulating Intestinal Barrier and Liver Immune Cells	Zhang H	Front Immunol	2020	10.3389/fimmu.2020.569104
32850468	other diseases	Fecal Microbiomes Distinguish Patients With Autoimmune Hepatitis From Healthy Individuals	Lou J	Front Cell Infect Microbiol	2020	10.3389/fcimb.2020.00342
31356917	other diseases	Phthalate exposure alters gut microbiota composition and IgM vaccine response in human newborns	Yang YN	Food Chem Toxicol	2019	10.1016/j.fct.2019.110700
30865287	other diseases	Probiotics to prevent infantile colic	Ong TG	Cochrane Database Syst Rev	2019	10.1002/14651858.CD012473.pub2
32191873	other diseases	Gut-Liver Physiomimetics Reveal Paradoxical Modulation of IBD-Related Inflammation by Short-Chain Fatty Acids	Trapecar M	Cell Syst	2020	10.1016/j.cels.2020.02.008
31747600	other diseases	Intestinal IL-17R Signaling Constrains IL-18-Driven Liver Inflammation by the Regulation of Microbiome-Derived Products	Castillo-Dela Cruz P	Cell Rep	2019	10.1016/j.celrep.2019.10.042
34678144	other diseases	Phase separation drives RNA virus-induced activation of the NLRP6 inflammasome	Shen C	Cell	2021	10.1016/j.cell.2021.09.032
33008316	other diseases	The University of Zimbabwe College of Health Sciences (UZ-CHS) BIRTH COHORT study: rationale, design and methods	Duri K	BMC Infect Dis	2020	10.1186/s12879-020-05432-6
25179593	other diseases	Functional gene arrays-based analysis of fecal microbiomes in patients with liver cirrhosis	Chen Y	BMC Genomics	2014	10.1186/1471-2164-15-753
34573017	other diseases	Ellagic Acid Prevents Binge Alcohol-Induced Leaky Gut and Liver Injury through Inhibiting Gut Dysbiosis and Oxidative Stress	Kim DH	Antioxidants (Basel)	2021	10.3390/antiox10091386
33505139	other diseases	Gut microbiota mediated molecular events and therapy in liver diseases	Qi X	World J Gastroenterol	2020	10.3748/wjg.v26.i48.7603
30288280	other diseases	Association of proton pump inhibitors with the risk of hepatic encephalopathy during hospitalization for liver cirrhosis	Zhu J	United European Gastroenterol J	2018	10.1177/2050640618773564
24918152	other diseases	Gut microbiota modulation in cirrhosis: a new frontier in hepatology	Karakan T	Turk J Gastroenterol	2014	10.5152/tjg.2014.0007
33810796	other diseases	Virtualized clinical studies to assess the natural history and impact of gut microbiome modulation in non-hospitalized patients with mild to moderate COVID-19 a randomized, open-label, prospective study with a parallel group study evaluating the physiologic effects of KB109 on gut microbiota structure and function: a structured summary of a study protocol for a randomized controlled study	Haran JP	Trials	2021	10.1186/s13063-021-05157-0
22172882	other diseases	Intestinal microbiota and innate immunity-related gene alteration in cirrhotic rats with liver transplantation	Xie YR	Transplant Proc	2011	10.1016/j.transproceed.2011.08.113
34611265	other diseases	Ileal mucosa-associated microbiota overgrowth associated with pathogenesis of primary biliary cholangitis	Kitahata S	Sci Rep	2021	10.1038/s41598-021-99314-9
34548598	other diseases	Conditioned medium from stem cells derived from human exfoliated deciduous teeth ameliorates NASH via the Gut-Liver axis	Muto H	Sci Rep	2021	10.1038/s41598-021-98254-8
34211048	other diseases	Acetaldehyde exposure underlies functional defects in monocytes induced by excessive alcohol consumption	Shiba S	Sci Rep	2021	10.1038/s41598-021-93086-y
33436764	other diseases	Microbiota analysis and transient elastography reveal new extra-hepatic components of liver steatosis and fibrosis in obese patients	Lanthier N	Sci Rep	2021	10.1038/s41598-020-79718-9
31427714	other diseases	Biomarkers for oralization during long-term proton pump inhibitor therapy predict survival in cirrhosis	Horvath A	Sci Rep	2019	10.1038/s41598-019-48352-5
29844325	other diseases	Combining amplicon sequencing and metabolomics in cirrhotic patients highlights distinctive microbiota features involved in bacterial translocation, systemic inflammation and hepatic encephalopathy	Iebba V	Sci Rep	2018	10.1038/s41598-018-26509-y
27922089	other diseases	Elderly patients have an altered gut-brain axis regardless of the presence of cirrhosis	Bajaj JS	Sci Rep	2016	10.1038/srep38481
27225869	other diseases	Impaired Gut-Liver-Brain Axis in Patients with Cirrhosis	Ahluwalia V	Sci Rep	2016	10.1038/srep26800
27112233	other diseases	Alteration of the serum microbiome composition in cirrhotic patients with ascites	Santiago A	Sci Rep	2016	10.1038/srep25001
26852926	other diseases	Intestinal Microbiota Distinguish Gout Patients from Healthy Humans	Guo Z	Sci Rep	2016	10.1038/srep20602
26692421	other diseases	Gut Microbiota Alterations can predict Hospitalizations in Cirrhosis Independent of Diabetes Mellitus	Bajaj JS	Sci Rep	2015	10.1038/srep18559
28146577	other diseases	Blood Microbiome Quantity and the Hyperdynamic Circulation in Decompensated Cirrhotic Patients	Traykova D	PLoS One	2017	10.1371/journal.pone.0169310
25658710	other diseases	Intestinal lesions are associated with altered intestinal microbiome and are more frequent in children and young adults with cystic fibrosis and cirrhosis	Flass T	PLoS One	2015	10.1371/journal.pone.0116967
24086392	other diseases	Ascitic microbiota composition is correlated with clinical severity in cirrhosis with portal hypertension	Rogers GB	PLoS One	2013	10.1371/journal.pone.0074884
23565181	other diseases	Modulation of the metabiome by rifaximin in patients with cirrhosis and minimal hepatic encephalopathy	Bajaj JS	PLoS One	2013	10.1371/journal.pone.0060042
34616612	other diseases	Compositional distinction of gut microbiota between Han Chinese and Tibetan populations with liver cirrhosis	Huan H	PeerJ	2021	10.7717/peerj.12142
29493105	other diseases	Probiotic supplementation increases obesity with no detectable effects on liver fat or gut microbiota in obese Hispanic adolescents: a 16-week, randomized, placebo-controlled trial	Jones RB	Pediatr Obes	2018	10.1111/ijpo.12273
29514667	other diseases	Bacillus subtilis spore with surface display of paramyosin from Clonorchis sinensis potentializes a promising oral vaccine candidate	Sun H	Parasit Vectors	2018	10.1186/s13071-018-2757-0
31797630	other diseases	Assessment of coverage for endogenous metabolites and exogenous chemical compounds using an untargeted metabolomics platform	Kong SW	Pac Symp Biocomput	2020
29423048	other diseases	Specific alterations in gut microbiota are associated with prognosis of Budd-Chiari syndrome	Sun YL	Oncotarget	2017	10.18632/oncotarget.23234
32906634	other diseases	Secondary Sclerosing Cholangitis in Critically Ill Patients Alters the Gut-Liver Axis: A Case Control Study	Blesl A	Nutrients	2020	10.3390/nu12092728
32414035	other diseases	Dietary Protein, Fiber and Coffee Are Associated with Small Intestine Microbiome Composition and Diversity in Patients with Liver Cirrhosis	Hussain SK	Nutrients	2020	10.3390/nu12051395
22297845	other diseases	Inflammasome-mediated dysbiosis regulates progression of NAFLD and obesity	Henao-Mejia J	Nature	2012	10.1038/nature10809
33020474	other diseases	Distinct signatures of gut microbiome and metabolites associated with significant fibrosis in non-obese NAFLD	Lee G	Nat Commun	2020	10.1038/s41467-020-18754-5
29018189	other diseases	The gut microbiome in atherosclerotic cardiovascular disease	Jie Z	Nat Commun	2017	10.1038/s41467-017-00900-1
34342541	other diseases	Comprehensive Strain-Level Analysis of the Gut Microbe Faecalibacterium prausnitzii in Patients with Liver Cirrhosis	Chen Y	mSystems	2021	10.1128/mSystems.00775-21
32546668	other diseases	Alterations in the Gut Microbiome in the Progression of Cirrhosis to Hepatocellular Carcinoma	Lapidot Y	mSystems	2020	10.1128/mSystems.00153-20
30606251	other diseases	Host immunoglobulin G selectively identifies pathobionts in pediatric inflammatory bowel diseases	Armstrong H	Microbiome	2019	10.1186/s40168-018-0604-3
34549998	other diseases	The Protective Effects of Live and Pasteurized Akkermansia muciniphila and Its Extracellular Vesicles against HFD/CCl4-Induced Liver Injury	Keshavarz Azizi Raftar S	Microbiol Spectr	2021	10.1128/Spectrum.00484-21
24590688	other diseases	Enhancement of functional connectivity, working memory and inhibitory control on multi-modal brain MR imaging with Rifaximin in Cirrhosis: implications for the gut-liver-brain axis	Ahluwalia V	Metab Brain Dis	2014	10.1007/s11011-014-9507-6
29500907	other diseases	Alterations in gut microbial function following liver transplant	Bajaj JS	Liver Transpl	2018	10.1002/lt.25046
31544308	other diseases	Metabolomics and microbial composition increase insight into the impact of dietary differences in cirrhosis	Cox IJ	Liver Int	2020	10.1111/liv.14256
31607677	other diseases	Safety of two different doses of simvastatin plus rifaximin in decompensated cirrhosis (LIVERHOPE-SAFETY): a randomised, double-blind, placebo-controlled, phase 2 trial	Pose E	Lancet Gastroenterol Hepatol	2020	10.1016/S2468-1253(19)30320-6
29515036	other diseases	Gut microbial RNA and DNA analysis predicts hospitalizations in cirrhosis	Bajaj JS	JCI Insight	2018	10.1172/jci.insight.98019
32679299	other diseases	Sex is associated with differences in gut microbial composition and function in hepatic encephalopathy	Saboo K	J Hepatol	2021	10.1016/j.jhep.2020.06.046
24374295	other diseases	Altered profile of human gut microbiome is associated with cirrhosis and its complications	Bajaj JS	J Hepatol	2014	10.1016/j.jhep.2013.12.019
23333527	other diseases	Modulation of the fecal bile acid profile by gut microbiota in cirrhosis	Kakiyama G	J Hepatol	2013	10.1016/j.jhep.2013.01.003
30340822	other diseases	Gut microbiota translocation promotes autoimmune cholangitis	Ma HD	J Autoimmun	2018	10.1016/j.jaut.2018.09.010
31388096	other diseases	Circulating microbiota-derived metabolites: a "liquid biopsy?	Aragonès G	Int J Obes (Lond)	2020	10.1038/s41366-019-0430-0
30959577	other diseases	Fructose Promotes Leaky Gut, Endotoxemia, and Liver Fibrosis Through Ethanol-Inducible Cytochrome P450-2E1-Mediated Oxidative and Nitrative Stress	Cho YE	Hepatology	2021	10.1002/hep.30652
29572891	other diseases	Link between gut-microbiome derived metabolite and shared gene-effects with hepatic steatosis and fibrosis in NAFLD	Caussy C	Hepatology	2018	10.1002/hep.29892
25820757	other diseases	Salivary microbiota reflects changes in gut microbiota in cirrhosis with hepatic encephalopathy	Bajaj JS	Hepatology	2015	10.1002/hep.27819
33385299	other diseases	Low-dose rifaximin prevents complications and improves survival in patients with decompensated liver cirrhosis	Zeng X	Hepatol Int	2021	10.1007/s12072-020-10117-y
33553973	other diseases	Fecal Microbiota Transplant in Cirrhosis Reduces Gut Microbial Antibiotic Resistance Genes: Analysis of Two Trials	Bajaj JS	Hepatol Commun	2020	10.1002/hep4.1639
33133240	other diseases	Stool and sputum microbiome during quinolone prophylaxis of spontaneous bacterial peritonitis: an exploratory study	Mücke MM	Gut Pathog	2020	10.1186/s13099-020-00389-y
34747331	other diseases	The Mucosally-Adherent Rectal Microbiota Contains Features Unique to Alcohol-Related Cirrhosis	Shen TD	Gut Microbes	2021	10.1080/19490976.2021.1987781
34530693	other diseases	Ursolic acid reverses liver fibrosis by inhibiting NOX4/NLRP3 inflammasome pathways and bacterial dysbiosis	Nie Y	Gut Microbes	2021	10.1080/19490976.2021.1972746
34437819	other diseases	Alterations in microbiota and their metabolites are associated with beneficial effects of bile acid sequestrant on icteric primary biliary Cholangitis	Li B	Gut Microbes	2021	10.1080/19490976.2021.1946366
30045880	other diseases	Gut microbiome analysis as a tool towards targeted non-invasive biomarkers for early hepatocellular carcinoma	Ren Z	Gut	2019	10.1136/gutjnl-2017-315084
28578302	other diseases	Fungal dysbiosis in cirrhosis	Bajaj JS	Gut	2018	10.1136/gutjnl-2016-313170
32687928	other diseases	Serum Levels of Metabolites Produced by Intestinal Microbes and Lipid Moieties Independently Associated With Acute-on-Chronic Liver Failure and Death in Patients With Cirrhosis	Bajaj JS	Gastroenterology	2020	10.1053/j.gastro.2020.07.019
31987796	other diseases	Synbiotics Alter Fecal Microbiomes, But Not Liver Fat or Fibrosis, in a Randomized Trial of Patients With Nonalcoholic Fatty Liver Disease	Scorletti E	Gastroenterology	2020	10.1053/j.gastro.2020.01.031
25450083	other diseases	Probiotic VSL#3 reduces liver disease severity and hospitalization in patients with cirrhosis: a randomized, controlled trial	Dhiman RK	Gastroenterology	2014	10.1053/j.gastro.2014.08.031
34917047	other diseases	Abundance of Lipopolysaccharide Heptosyltransferase I in Human Gut Microbiome and Its Association With Cardiovascular Disease and Liver Cirrhosis	Lin S	Front Microbiol	2021	10.3389/fmicb.2021.756976
30631318	other diseases	Disorganized Gut Microbiome Contributed to Liver Cirrhosis Progression: A Meta-Omics-Based Study	Shao L	Front Microbiol	2018	10.3389/fmicb.2018.03166
30483228	other diseases	Alterations of Gut Microbiota in Cholestatic Infants and Their Correlation With Hepatic Function	Guo C	Front Microbiol	2018	10.3389/fmicb.2018.02682
29867867	other diseases	Splenectomy Leads to Amelioration of Altered Gut Microbiota and Metabolome in Liver Cirrhosis Patients	Liu Y	Front Microbiol	2018	10.3389/fmicb.2018.00963
27899923	other diseases	Community-Metabolome Correlations of Gut Microbiota from Child-Turcotte-Pugh of A and B Patients	Wei X	Front Microbiol	2016	10.3389/fmicb.2016.01856
34722597	other diseases	Lactitol Supplementation Modulates Intestinal Microbiome in Liver Cirrhotic Patients	Lu H	Front Med (Lausanne)	2021	10.3389/fmed.2021.762930
32159510	other diseases	Adjusting for age improves identification of gut microbiome alterations in multiple diseases	Ghosh TS	Elife	2020	10.7554/eLife.50240
32352707	other diseases	Altered Microbiota Diversity and Bile Acid Signaling in Cirrhotic and Noncirrhotic NASH-HCC	Sydor S	Clin Transl Gastroenterol	2020	10.14309/ctg.0000000000000131
30905718	other diseases	Alterations in Skin Microbiomes of Patients With Cirrhosis	Bajaj JS	Clin Gastroenterol Hepatol	2019	10.1016/j.cgh.2019.03.028
28167158	other diseases	Most Individuals With Advanced Cirrhosis Have Sleep Disturbances, Which Are Associated With Poor Quality of Life	Ghabril M	Clin Gastroenterol Hepatol	2017	10.1016/j.cgh.2017.01.027
31004827	other diseases	Predicting Clinical Outcomes of Cirrhosis Patients With Hepatic Encephalopathy From the Fecal Microbiome	Sung CM	Cell Mol Gastroenterol Hepatol	2019	10.1016/j.jcmgh.2019.04.008
32610095	other diseases	A Universal Gut-Microbiome-Derived Signature Predicts Cirrhosis	Oh TG	Cell Metab	2020	10.1016/j.cmet.2020.06.005
33323397	other diseases	Gut Microbiome Directs Hepatocytes to Recruit MDSCs and Promote Cholangiocarcinoma	Zhang Q	Cancer Discov	2021	10.1158/2159-8290.CD-20-0304
30772848	other diseases	PROFIT, a PROspective, randomised placebo controlled feasibility trial of Faecal mIcrobiota Transplantation in cirrhosis: study protocol for a single-blinded trial	Woodhouse CA	BMJ Open	2019	10.1136/bmjopen-2018-023518
29179682	other diseases	Faecal bacterial microbiota in patients with cirrhosis and the effect of lactulose administration	Sarangi AN	BMC Gastroenterol	2017	10.1186/s12876-017-0683-9
27716148	other diseases	Cirrhosis related functionality characteristic of the fecal microbiota as revealed by a metaproteomic approach	Wei X	BMC Gastroenterol	2016	10.1186/s12876-016-0534-0
27431238	other diseases	BAT117213: Ileal bile acid transporter (IBAT) inhibition as a treatment for pruritus in primary biliary cirrhosis: study protocol for a randomised controlled trial	Hegade VS	BMC Gastroenterol	2016	10.1186/s12876-016-0481-9
27734124	other diseases	HuMiChip2 for strain level identification and functional profiling of human microbiomes	Tu Q	Appl Microbiol Biotechnol	2017	10.1007/s00253-016-7910-0
30118351	other diseases	Periodontal therapy favorably modulates the oral-gut-hepatic axis in cirrhosis	Bajaj JS	Am J Physiol Gastrointest Liver Physiol	2018	10.1152/ajpgi.00230.2018
24628464	other diseases	Randomised clinical trial: Lactobacillus GG modulates gut microbiome, metabolome and endotoxemia in patients with cirrhosis	Bajaj JS	Aliment Pharmacol Ther	2014	10.1111/apt.12695
33995594	other diseases	Antacid exposure and immunotherapy outcomes among patients with advanced hepatocellular carcinoma	Jun T	Ther Adv Med Oncol	2021	10.1177/17588359211010937
28345673	other diseases	Sex-dependent effects on gut microbiota regulate hepatic carcinogenic outcomes	Xie G	Sci Rep	2017	10.1038/srep45232
27036035	other diseases	Distinctly altered gut microbiota in the progression of liver disease	Xie G	Oncotarget	2016	10.18632/oncotarget.8466
23792451	other diseases	Discovery of colorectal cancer PIK3CA mutation as potential predictive biomarker: power and promise of molecular pathological epidemiology	Ogino S	Oncogene	2014	10.1038/onc.2013.244
32629893	other diseases	Chenopodium Quinoa and Salvia Hispanica Provide Immunonutritional Agonists to Ameliorate Hepatocarcinoma Severity under a High-Fat Diet	Laparra Llopis JM	Nutrients	2020	10.3390/nu12071946
32443684	other diseases	Early Effect of Supplemented Infant Formulae on Intestinal Biomarkers and Microbiota: A Randomized Clinical Trial	Castanet M	Nutrients	2020	10.3390/nu12051481
32555455	other diseases	A metabolic pathway for bile acid dehydroxylation by the gut microbiome	Funabashi M	Nature	2020	10.1038/s41586-020-2396-4
23803760	other diseases	Obesity-induced gut microbial metabolite promotes liver cancer through senescence secretome	Yoshimoto S	Nature	2013	10.1038/nature12347
32839596	other diseases	Fructose stimulated de novo lipogenesis is promoted by inflammation	Todoric J	Nat Metab	2020	10.1038/s42255-020-0261-2
25033057	other diseases	Biotransformation and in vitro metabolic profile of bioactive extracts from a traditional Miao-nationality herbal medicine, Polygonum capitatum	He CY	Molecules	2014	10.3390/molecules190710291
33343967	other diseases	Hepatocellular carcinoma immunotherapy: The impact of epigenetic drugs and the gut microbiome	Vaziri F	Liver Res	2020	10.1016/j.livres.2020.10.001
34950181	other diseases	Early Antibiotic Exposure Is Not Detrimental to Therapeutic Effect from Immunotherapy in Hepatocellular Carcinoma	Fessas P	Liver Cancer	2021	10.1159/000519108
31337439	other diseases	Gut microbiome affects the response to anti-PD-1 immunotherapy in patients with hepatocellular carcinoma	Zheng Y	J Immunother Cancer	2019	10.1186/s40425-019-0650-9
34722779	other diseases	Dysbiosis of Gut Microbiota Promotes Hepatocellular Carcinoma Progression by Regulating the Immune Response	Zhang N	J Immunol Res	2021	10.1155/2021/4973589
33413510	other diseases	Hepatic NOD2 promotes hepatocarcinogenesis via a RIP2-mediated proinflammatory response and a novel nuclear autophagy-mediated DNA damage mechanism	Zhou Y	J Hematol Oncol	2021	10.1186/s13045-020-01028-4
31296243	other diseases	Intestinal dysbacteriosis-induced IL-25 promotes development of HCC via alternative activation of macrophages in tumor microenvironment	Li Q	J Exp Clin Cancer Res	2019	10.1186/s13046-019-1271-3
30857300	other diseases	Antiproliferative and Cytotoxic Activity of Xanthohumol and Its Non-Estrogenic Derivatives in Colon and Hepatocellular Carcinoma Cell Lines	Logan IE	Int J Mol Sci	2019	10.3390/ijms20051203
30980680	other diseases	Overuse of antianaerobic drug is associated with poor postchemotherapy prognosis of patients with hepatocellular carcinoma	Iida N	Int J Cancer	2019	10.1002/ijc.32339
27273788	other diseases	Dysregulated hepatic bile acids collaboratively promote liver carcinogenesis	Xie G	Int J Cancer	2016	10.1002/ijc.30219
32258950	other diseases	Bile Acid Changes Associated With Liver Fibrosis and Steatosis in the Mexican-American Population of South Texas	Kwan SY	Hepatol Commun	2020	10.1002/hep4.1490
34491886	other diseases	Associations of the gut microbiome with hepatic adiposity in the Multiethnic Cohort Adiposity Phenotype Study	Hullar MAJ	Gut Microbes	2021	10.1080/19490976.2021.1965463
32849498	other diseases	Beneficial Effect of Antibiotics and Microbial Metabolites on Expanded Vδ2Vγ9 T Cells in Hepatocellular Carcinoma Immunotherapy	Han J	Front Immunol	2020	10.3389/fimmu.2020.01380
30340040	other diseases	Dysregulated Microbial Fermentation of Soluble Fiber Induces Cholestatic Liver Cancer	Singh V	Cell	2018	10.1016/j.cell.2018.09.004
28202625	other diseases	Gut Microbiota Promotes Obesity-Associated Liver Cancer through PGE(2)-Mediated Suppression of Antitumor Immunity	Loo TM	Cancer Discov	2017	10.1158/2159-8290.CD-16-0932
22516259	other diseases	Promotion of hepatocellular carcinoma by the intestinal microbiota and TLR4	Dapito DH	Cancer Cell	2012	10.1016/j.ccr.2012.02.007
27454254	other diseases	Abstracts from the 3rd International Genomic Medicine Conference (3rd IGMC 2015) : Jeddah, Kingdom of Saudi Arabia. 30 November - 3 December 2015	Shay JW	BMC Genomics	2016	10.1186/s12864-016-2858-0
34736448	other diseases	Antiproliferative, antibacterial, and antioxidant activities of Bauhinia strychnifolia Craib aqueous extracts in gut and liver perspective	Phonghanpot S	BMC Complement Med Ther	2021	10.1186/s12906-021-03448-2
26022129	other diseases	Effect of hyperglycemia on hepatocellular carcinoma development in diabetes	Niwa Y	Biochem Biophys Res Commun	2015	10.1016/j.bbrc.2015.05.066
34671614	not 16S rRNA	Distinct Bile Acid Profiles in Patients With Chronic Hepatitis B Virus Infection Reveal Metabolic Interplay Between Host, Virus and Gut Microbiome	Sun Z	Front Med (Lausanne)	2021	10.3389/fmed.2021.708495
24369878	not 16S rRNA	Abnormal fecal microbiota community and functions in patients with hepatitis B liver cirrhosis as revealed by a metagenomic approach	Wei X	BMC Gastroenterol	2013	10.1186/1471-230X-13-175
28683828	not 16S rRNA	VirFinder: a novel k-mer based tool for identifying viral sequences from assembled metagenomic data	Ren J	Microbiome	2017	10.1186/s40168-017-0283-5
31098399	not 16S rRNA	A Metagenomic Meta-analysis Reveals Functional Signatures of Health and Disease in the Human Gut Microbiome	Armour CR	mSystems	2019	10.1128/mSystems.00332-18
32985923	not 16S rRNA	Metagenomic analysis reveals distinct patterns of gut lactobacillus prevalence, abundance, and geographical variation in health and disease	Ghosh TS	Gut Microbes	2020	10.1080/19490976.2020.1822729
32941879	not 16S rRNA	Alterations in Gut Microbiome in Cirrhosis as Assessed by Quantitative Metagenomics: Relationship With Acute-on-Chronic Liver Failure and Prognosis	Solé C	Gastroenterology	2021	10.1053/j.gastro.2020.08.054
33330625	not 16S rRNA	Metagenomic Analysis Reveals the Distribution of Antibiotic Resistance Genes in a Large-Scale Population of Healthy Individuals and Patients With Varied Diseases	Qiu Q	Front Mol Biosci	2020	10.3389/fmolb.2020.590018
29568746	not 16S rRNA	Metagenomics Biomarkers Selected for Prediction of Three Different Diseases in Chinese Population	Wu H	Biomed Res Int	2018	10.1155/2018/2936257
31750262	non-human	Hepatitis B Virus Infection Alters Gut Microbiota Composition in Mice	Zhu Q	Front Cell Infect Microbiol	2019	10.3389/fcimb.2019.00377
34933425	non-human	[Intestinal flora polymorphisms with different lesional stages in an animal model of MAFLD]	Xia QY	Zhonghua Gan Zang Bing Za Zhi	2021	10.3760/cma.j.cn501113-20200826-00478
29219669	non-human	Metabolic profile elucidation of Zhi-Zi-Da-Huang decoction in rat intestinal bacteria using high-resolution mass spectrometry combined with multiple analytical perspectives	Wang M	Xenobiotica	2019	10.1080/00498254.2017.1414972
29306503	non-human	A mouse model with age-dependent immune response and immune-tolerance for HBV infection	Yi X	Vaccine	2018	10.1016/j.vaccine.2017.12.071
28562651	non-human	Correction: Alcohol-related changes in the intestinal microbiome influence neutrophil infiltration, inflammation and steatosis in early alcoholic hepatitis in mice	Lowe PP	PLoS One	2017	10.1371/journal.pone.0179070
28107512	non-human	Nonstructural 5A Protein of Hepatitis C Virus Interferes with Toll-Like Receptor Signaling and Suppresses the Interferon Response in Mouse Liver	Tsutsumi T	PLoS One	2017	10.1371/journal.pone.0170461
25853710	non-human	Rectal application of a highly osmolar personal lubricant in a macaque model induces acute cytotoxicity but does not increase risk of SHIV infection	Vishwanathan SA	PLoS One	2015	10.1371/journal.pone.0120021
22427959	non-human	Enteric infection with Citrobacter rodentium induces coagulative liver necrosis and hepatic inflammation prior to peak infection and colonic disease	Raczynski AR	PLoS One	2012	10.1371/journal.pone.0033099
32927823	non-human	Obesity Worsens Gulf War Illness Symptom Persistence Pathology by Linking Altered Gut Microbiome Species to Long-Term Gastrointestinal, Hepatic, and Neuronal Inflammation in a Mouse Model	Bose D	Nutrients	2020	10.3390/nu12092764
32824008	non-human	Protective Effects of Black Raspberry (Rubus occidentalis) Extract against Hypercholesterolemia and Hepatic Inflammation in Rats Fed High-Fat and High-Choline Diets	Lim T	Nutrients	2020	10.3390/nu12082448
23552069	non-human	Microbiota-derived lactate accelerates colon epithelial cell turnover in starvation-refed mice	Okada T	Nat Commun	2013	10.1038/ncomms2668
31105269	non-human	Alcohol-induced IL-17A production in Paneth cells amplifies endoplasmic reticulum stress, apoptosis, and inflammasome-IL-18 activation in the proximal small intestine in mice	Gyongyosi B	Mucosal Immunol	2019	10.1038/s41385-019-0170-4
33369197	non-human	Punicalagin Prevents Hepatic Steatosis through Improving Lipid Homeostasis and Inflammation in Liver and Adipose Tissue and Modulating Gut Microbiota in Western Diet-Fed Mice	Liu H	Mol Nutr Food Res	2021	10.1002/mnfr.202001031
34482357	non-human	Live Combined B. subtilis and E. faecium Alleviate Liver Inflammation, Improve Intestinal Barrier Function, and Modulate Gut Microbiota in Mice with Non-Alcoholic Fatty Liver Disease	Jiang J	Med Sci Monit	2021	10.12659/MSM.931143
28139956	non-human	BACTERIAL MICROBIOTA IN HARBOR SEALS (PHOCA VITULINA) FROM THE NORTH SEA OF SCHLESWIG-HOLSTEIN, GERMANY, AROUND THE TIME OF MORBILLIVIRUS AND INFLUENZA EPIDEMICS	Siebert U	J Wildl Dis	2017	10.7589/2015-11-320
34517094	non-human	Probiotics alleviate autoimmune hepatitis in mice through modulation of gut microbiota and intestinal permeability	Liu Q	J Nutr Biochem	2021	10.1016/j.jnutbio.2021.108863
29500240	non-human	Murine γ-Herpesvirus 68 Induces Severe Lung Inflammation in IL-27-Deficient Mice with Liver Dysfunction Preventable by Oral Neomycin	Kanai K	J Immunol	2018	10.4049/jimmunol.1700412
28088582	non-human	RIPK1 protects hepatocytes from Kupffer cells-mediated TNF-induced apoptosis in mouse models of PAMP-induced hepatitis	Filliol A	J Hepatol	2017	10.1016/j.jhep.2017.01.005
32360229	non-human	Entecavir therapy reverses gut microbiota dysbiosis induced by hepatitis B virus infection in a mouse model	Li X	Int J Antimicrob Agents	2020	10.1016/j.ijantimicag.2020.106000
32978699	non-human	Short-Term Cohousing of Sick with Healthy or Treated Mice Alleviates the Inflammatory Response and Liver Damage	Shabat Y	Inflammation	2021	10.1007/s10753-020-01348-0
31520476	non-human	Paneth Cell Dysfunction Mediates Alcohol-related Steatohepatitis Through Promoting Bacterial Translocation in Mice: Role of Zinc Deficiency	Zhong W	Hepatology	2020	10.1002/hep.30945
26185095	non-human	A novel "humanized mouse" model for autoimmune hepatitis and the association of gut microbiota with liver inflammation	Yuksel M	Hepatology	2015	10.1002/hep.27998
34510840	non-human	Hepatic Adenosine Triphosphate Reduction Through the Short-Chain Fatty Acids-Peroxisome Proliferator-Activated Receptor γ-Uncoupling Protein 2 Axis Alleviates Immune-Mediated Acute Hepatitis in Inulin-Supplemented Mice	Yamaguchi A	Hepatol Commun	2021	10.1002/hep4.1742
31123503	non-human	Cytokines derived from innate lymphoid cells assist Helicobacter hepaticus to aggravate hepatocellular tumorigenesis in viral transgenic mice	Han X	Gut Pathog	2019	10.1186/s13099-019-0302-0
30448775	non-human	Bacteria engineered to produce IL-22 in intestine induce expression of REG3G to reduce ethanol-induced liver disease in mice	Hendrikx T	Gut	2019	10.1136/gutjnl-2018-317232
25080446	non-human	A polyphenol-rich cranberry extract protects from diet-induced obesity, insulin resistance and intestinal inflammation in association with increased Akkermansia spp. population in the gut microbiota of mice	Anhê FF	Gut	2015	10.1136/gutjnl-2014-307142
19850960	non-human	Gut microbes define liver cancer risk in mice exposed to chemical and viral transgenic hepatocarcinogens	Fox JG	Gut	2010	10.1136/gut.2009.183749
19240062	non-human	Changes in gut microbiota control inflammation in obese mice through a mechanism involving GLP-2-driven improvement of gut permeability	Cani PD	Gut	2009	10.1136/gut.2008.165886
27132185	non-human	Mouse and Human Liver Contain Immunoglobulin A-Secreting Cells Originating From Peyer's Patches and Directed Against Intestinal Antigens	Moro-Sibilot L	Gastroenterology	2016	10.1053/j.gastro.2016.04.014
33250767	non-human	Sex-Dependent Effects on Liver Inflammation and Gut Microbial Dysbiosis After Continuous Developmental Exposure to Trichloroethylene in Autoimmune-Prone Mice	Blossom SJ	Front Pharmacol	2020	10.3389/fphar.2020.569008
29033903	non-human	Protective Effect of Akkermansia muciniphila against Immune-Mediated Liver Injury in a Mouse Model	Wu W	Front Microbiol	2017	10.3389/fmicb.2017.01804
34912328	non-human	Fecal Microbiota Transplantation Controls Progression of Experimental Autoimmune Hepatitis in Mice by Modulating the TFR/TFH Immune Imbalance and Intestinal Microbiota Composition	Liang M	Front Immunol	2021	10.3389/fimmu.2021.728723
33912174	non-human	Aberrant Gut Microbiome Contributes to Intestinal Oxidative Stress, Barrier Dysfunction, Inflammation and Systemic Autoimmune Responses in MRL/lpr Mice	Wang H	Front Immunol	2021	10.3389/fimmu.2021.651191
33042866	non-human	Corrigendum: Hepatitis B Virus Infection Alters Gut Microbiota Composition in Mice	Zhu Q	Front Cell Infect Microbiol	2020	10.3389/fcimb.2020.00490
31238017	non-human	Intestinal microbiota contributes to altered glucose metabolism in simulated microgravity mouse model	Wang Y	FASEB J	2019	10.1096/fj.201900238RR
34198609	non-human	Colesevelam Reduces Ethanol-Induced Liver Steatosis in Humanized Gnotobiotic Mice	Cabré N	Cells	2021	10.3390/cells10061496
33631374	non-human	Intestinal α1-2-Fucosylation Contributes to Obesity and Steatohepatitis in Mice	Zhou R	Cell Mol Gastroenterol Hepatol	2021	10.1016/j.jcmgh.2021.02.009
31866426	non-human	Roseburia spp. Abundance Associates with Alcohol Consumption in Humans and Its Administration Ameliorates Alcoholic Fatty Liver in Mice	Seo B	Cell Host Microbe	2020	10.1016/j.chom.2019.11.001
32879216	non-human	A Lipid-Based Nanocarrier Containing Active Vitamin D(3) Ameliorates NASH in Mice via Direct and Intestine-Mediated Effects on Liver Inflammation	Mu Y	Biol Pharm Bull	2020	10.1248/bpb.b20-00432
28161446	non-human	Drunk bugs: Chronic vapour alcohol exposure induces marked changes in the gut microbiome in mice	Peterson VL	Behav Brain Res	2017	10.1016/j.bbr.2017.01.049
31515596	non-human	Protective effects of Lactobacillus plantarum against chronic alcohol-induced liver injury in the murine model	Fang TJ	Appl Microbiol Biotechnol	2019	10.1007/s00253-019-10122-8
26129950	non-human	Antibiotic-induced imbalances in gut microbiota aggravates cholesterol accumulation and liver injuries in rats fed a high-cholesterol diet	Hu X	Appl Microbiol Biotechnol	2015	10.1007/s00253-015-6753-4
31632541	non-human	Synergistic effects of Lactobacillus rhamnosus culture supernatant and bone marrow mesenchymal stem cells on the development of alcoholic steatohepatitis in mice	Cai C	Am J Transl Res	2019
31509430	non-human	Rifaximin prevents ethanol-induced liver injury in obese KK-A(y) mice through modulation of small intestinal microbiota signature	Kitagawa R	Am J Physiol Gastrointest Liver Physiol	2019	10.1152/ajpgi.00372.2018
23783298	non-human	Dietary fructose induces endotoxemia and hepatic injury in calorically controlled primates	Kavanagh K	Am J Clin Nutr	2013	10.3945/ajcn.112.057331
32628772	non-human	Deficiency of Intestinal α1-2-Fucosylation Exacerbates Ethanol-Induced Liver Disease in Mice	Zhou R	Alcohol Clin Exp Res	2020	10.1111/acer.14405
31710124	non-human	A Novel Mouse Model of Acute-on-Chronic Cholestatic Alcoholic Liver Disease: A Systems Biology Comparison With Human Alcoholic Hepatitis	Furuya S	Alcohol Clin Exp Res	2020	10.1111/acer.14234
34218553	non-human	[Effects of evodiamine on carbon tetrachloride-induced liver fibrosis mice based on modulating gut microbiota]	Miao J	Zhonghua Lao Dong Wei Sheng Zhi Ye Bing Za Zhi	2021	10.3760/cma.j.cn121094-20201204-00666
30674978	non-human	Administration of N-Acyl-Phosphatidylethanolamine Expressing Bacteria to Low Density Lipoprotein Receptor(-/-) Mice Improves Indices of Cardiometabolic Disease	May-Zhang LS	Sci Rep	2019	10.1038/s41598-018-37373-1
28939830	non-human	Lack of NLRP3-inflammasome leads to gut-liver axis derangement, gut dysbiosis and a worsened phenotype in a mouse model of NAFLD	Pierantonelli I	Sci Rep	2017	10.1038/s41598-017-11744-6
28761060	non-human	Administration of Lactobacillus salivarius LI01 or Pediococcus pentosaceus LI05 prevents CCl(4)-induced liver cirrhosis by protecting the intestinal barrier in rats	Shi D	Sci Rep	2017	10.1038/s41598-017-07091-1
28368023	non-human	Fermented milk containing Lactobacillus paracasei subsp. paracasei CNCM I-1518 reduces bacterial translocation in rats treated with carbon tetrachloride	Sánchez E	Sci Rep	2017	10.1038/srep45712
33395434	non-human	Modeling dysbiosis of human NASH in mice: Loss of gut microbiome diversity and overgrowth of Erysipelotrichales	Carter JK	PLoS One	2021	10.1371/journal.pone.0244763
27851786	non-human	Calcium Reduces Liver Injury in Mice on a High-Fat Diet: Alterations in Microbial and Bile Acid Profiles	Nadeem Aslam M	PLoS One	2016	10.1371/journal.pone.0166178
21829583	non-human	Gut microbiota dysbiosis is associated with inflammation and bacterial translocation in mice with CCl4-induced fibrosis	Gómez-Hurtado I	PLoS One	2011	10.1371/journal.pone.0023037
33059126	non-human	Dietary fiber regulates intestinal flora and suppresses liver and systemic inflammation to alleviate liver fibrosis in mice	Li MM	Nutrition	2021	10.1016/j.nut.2020.110959
30818779	non-human	Green Coffee Extract Improves Cardiometabolic Parameters and Modulates Gut Microbiota in High-Fat-Diet-Fed ApoE(-/-) Mice	Caro-Gómez E	Nutrients	2019	10.3390/nu11030497
28604704	non-human	Thermoneutral housing exacerbates nonalcoholic fatty liver disease in mice and allows for sex-independent disease modeling	Giles DA	Nat Med	2017	10.1038/nm.4346
30801032	non-human	Sequential Changes in the Mesenteric Lymph Node Microbiome and Immune Response during Cirrhosis Induction in Rats	Santiago A	mSystems	2019	10.1128/mSystems.00278-18
31599067	non-human	Mastiha (Pistacia lentiscus) Improves Gut Microbiota Diversity, Hepatic Steatosis, and Disease Activity in a Biopsy-Confirmed Mouse Model of Advanced Non-Alcoholic Steatohepatitis and Fibrosis	Kannt A	Mol Nutr Food Res	2019	10.1002/mnfr.201900927
25421042	non-human	Reduction of endotoxin attenuates liver fibrosis through suppression of hepatic stellate cell activation and remission of intestinal permeability in a rat non-alcoholic steatohepatitis model	Douhara A	Mol Med Rep	2015	10.3892/mmr.2014.2995
31623107	non-human	Study of Fecal and Urinary Metabolite Perturbations Induced by Chronic Ethanol Treatment in Mice by UHPLC-MS/MS Targeted Profiling	Deda O	Metabolites	2019	10.3390/metabo9100232
34225483	non-human	Ileal Bile Acid Transporter Inhibitor Improves Hepatic Steatosis by Ameliorating Gut Microbiota Dysbiosis in NAFLD Model Mice	Matsui M	mBio	2021	10.1128/mBio.01155-21
28834270	non-human	Norfloxacin is more effective than Rifaximin in avoiding bacterial translocation in an animal model of cirrhosis	Gómez-Hurtado I	Liver Int	2018	10.1111/liv.13551
24750552	non-human	VSL#3 probiotic treatment decreases bacterial translocation in rats with carbon tetrachloride-induced cirrhosis	Sánchez E	Liver Int	2015	10.1111/liv.12566
23448378	non-human	Symbiotic formulation in experimentally induced liver fibrosis in rats: intestinal microbiota as a key point to treat liver damage?	D'Argenio G	Liver Int	2013	10.1111/liv.12117
17966971	non-human	Analysis of time-related metabolic fluctuations induced by ethionine in the rat	Skordi E	J Proteome Res	2007	10.1021/pr070268q
34663520	non-human	Deletion of intestinal SIRT1 exacerbated muscle wasting in cirrhotic mice by decreasing the intestinal concentration of short-chain fatty acids and inflammation	Hsu CF	J Pharmacol Sci	2021	10.1016/j.jphs.2021.09.003
28363136	non-human	Urinary metabonomics study of the hepatoprotective effects of total alkaloids from Corydalis saxicola Bunting on carbon tetrachloride-induced chronic hepatotoxicity in rats using (1)H NMR analysis	Wu F	J Pharm Biomed Anal	2017	10.1016/j.jpba.2017.03.031
30292107	non-human	Liraglutide modulates gut microbiota and reduces NAFLD in obese mice	Moreira GV	J Nutr Biochem	2018	10.1016/j.jnutbio.2018.07.009
34047390	non-human	Gut microbiota contributes to sexual dimorphism in murine autoimmune cholangitis	Huang MX	J Leukoc Biol	2021	10.1002/JLB.3MA0321-037R
24296725	non-human	Microbiome composition by pyrosequencing in mesenteric lymph nodes of rats with CCl4-induced cirrhosis	Cuenca S	J Innate Immun	2014	10.1159/000356454
26723896	non-human	Obeticholic acid reduces bacterial translocation and inhibits intestinal inflammation in cirrhotic rats	Úbeda M	J Hepatol	2016	10.1016/j.jhep.2015.12.010
22727732	non-human	Profound impact of gut homeostasis on chemically-induced pro-tumorigenic inflammation and hepatocarcinogenesis in rats	Zhang HL	J Hepatol	2012	10.1016/j.jhep.2012.06.011
22173161	non-human	Intestinal decontamination inhibits TLR4 dependent fibronectin-mediated cross-talk between stellate cells and endothelial cells in liver fibrosis in mice	Zhu Q	J Hepatol	2012	10.1016/j.jhep.2011.11.013
33472728	non-human	Effects of probiotics on intestinal flora, inflammation and degree of liver cirrhosis in rats with liver cirrhosis by regulating Wnt/β-catenin signaling pathway	Feng Y	J Biol Regul Homeost Agents	2021	10.23812/20-242-A
32075905	non-human	Bile acid sequestration reverses liver injury and prevents progression of nonalcoholic steatohepatitis in Western diet-fed mice	Takahashi S	J Biol Chem	2020	10.1074/jbc.RA119.011913
32405360	non-human	Microbiome alterations are related to an imbalance of immune response and bacterial translocation in BDL-rats	Vega-Magaña N	Iran J Basic Med Sci	2020	10.22038/IJBMS.2019.36487.8753
33513830	non-human	Intestinal SIRT1 Deficiency-Related Intestinal Inflammation and Dysbiosis Aggravate TNFα-Mediated Renal Dysfunction in Cirrhotic Ascitic Mice	Chou YT	Int J Mol Sci	2021	10.3390/ijms22031233
32295161	non-human	Prior Toxoplasma Gondii Infection Ameliorates Liver Fibrosis Induced by Schistosoma Japonicum through Inhibiting Th2 Response and Improving Balance of Intestinal Flora in Mice	Xu F	Int J Mol Sci	2020	10.3390/ijms21082711
31830621	non-human	Inulin alleviates inflammation of alcoholic liver disease via SCFAs-inducing suppression of M1 and facilitation of M2 macrophages in mice	Wang Z	Int Immunopharmacol	2020	10.1016/j.intimp.2019.106062
25227279	non-human	Oral administration of Saccharomyces boulardii ameliorates carbon tetrachloride-induced liver fibrosis in rats via reducing intestinal permeability and modulating gut microbial composition	Li M	Inflammation	2015	10.1007/s10753-014-0019-7
31571251	non-human	Probiotic Lactobacillus rhamnosus GG Prevents Liver Fibrosis Through Inhibiting Hepatic Bile Acid Synthesis and Enhancing Bile Acid Excretion in Mice	Liu Y	Hepatology	2020	10.1002/hep.30975
31505038	non-human	Monoacylglycerol Lipase Inhibition Protects From Liver Injury in Mouse Models of Sclerosing Cholangitis	Tardelli M	Hepatology	2020	10.1002/hep.30929
31220352	non-human	Neuroinflammation in Murine Cirrhosis Is Dependent on the Gut Microbiome and Is Attenuated by Fecal Transplant	Liu R	Hepatology	2020	10.1002/hep.30827
30414342	non-human	Intestinal Immune Dysregulation Driven by Dysbiosis Promotes Barrier Disruption and Bacterial Translocation in Rats With Cirrhosis	Muñoz L	Hepatology	2019	10.1002/hep.30349
27339732	non-human	Gut microbiota drive the development of neuroinflammatory response in cirrhosis in mice	Kang DJ	Hepatology	2016	10.1002/hep.28696
23959503	non-human	Dysbiosis contributes to fibrogenesis in the course of chronic liver injury in mice	De Minicis S	Hepatology	2014	10.1002/hep.26695
22120983	non-human	Toll-like receptor 4-dependent Kupffer cell activation and liver injury in a novel mouse model of parenteral nutrition and intestinal injury	El Kasmi KC	Hepatology	2012	10.1002/hep.25500
22095436	non-human	Intestinal bacterial translocation in rats with cirrhosis is related to compromised Paneth cell antimicrobial host defense	Teltschik Z	Hepatology	2012	10.1002/hep.24789
34510838	non-human	Obeticholic Acid Decreases Intestinal Content of Enterococcus in Rats With Cirrhosis and Ascites	Yan K	Hepatol Commun	2021	10.1002/hep4.1740
30556040	non-human	Diet-Induced Dysbiosis and Genetic Background Synergize With Cystic Fibrosis Transmembrane Conductance Regulator Deficiency to Promote Cholangiopathy in Mice	Debray D	Hepatol Commun	2018	10.1002/hep4.1266
29404434	non-human	Gut microbial composition can differentially regulate bile acid synthesis in humanized mice	Kang DJ	Hepatol Commun	2017	10.1002/hep4.1020
33300439	non-human	Host miRNA-21 promotes liver dysfunction by targeting small intestinal Lactobacillus in mice	Santos AA	Gut Microbes	2020	10.1080/19490976.2020.1840766
32167008	non-human	Beneficial effects of LRP6-CRISPR on prevention of alcohol-related liver injury surpassed fecal microbiota transplant in a rat model	Yu L	Gut Microbes	2020	10.1080/19490976.2020.1736457
25239591	non-human	Supplementation of saturated long-chain fatty acids maintains intestinal eubiosis and reduces ethanol-induced liver injury in mice	Chen P	Gastroenterology	2015	10.1053/j.gastro.2014.09.014
34764881	non-human	Green Plant Pigment, Chlorophyllin, Ameliorates Non-alcoholic Fatty Liver Diseases (NAFLDs) Through Modulating Gut Microbiome in Mice	Yang Y	Front Physiol	2021	10.3389/fphys.2021.739174
34248683	non-human	Hepatic Branch Vagotomy Modulates the Gut-Liver-Brain Axis in Murine Cirrhosis	Zhang Y	Front Physiol	2021	10.3389/fphys.2021.702646
32390962	non-human	Lactobacillus murinus Improved the Bioavailability of Orally Administered Glycyrrhizic Acid in Rats	Yuan T	Front Microbiol	2020	10.3389/fmicb.2020.00597
32083022	non-human	Gut Microbial Dysbiosis Is Associated With Profibrotic Factors in Liver Fibrosis Mice	Wan S	Front Cell Infect Microbiol	2020	10.3389/fcimb.2020.00018
28933492	non-human	The hepatoprotective effect of the probiotic Clostridium butyricum against carbon tetrachloride-induced acute liver damage in mice	Liu J	Food Funct	2017	10.1039/c7fo00355b
25466902	non-human	Commensal microbiota is hepatoprotective and prevents liver fibrosis in mice	Mazagova M	FASEB J	2015	10.1096/fj.14-259515
33732312	non-human	Modulating effects of the probiotic Lactococcus lactis on the hepatic fibrotic process induced by CCl(4) in Wistar rats	Delgado-Venegas CS	Exp Ther Med	2021	10.3892/etm.2021.9770
29748815	non-human	Improved hemodynamic and liver function in portal hypertensive cirrhotic rats after administration of B. pseudocatenulatum CECT 7765	Gómez-Hurtado I	Eur J Nutr	2019	10.1007/s00394-018-1709-y
25657013	non-human	Bifidobacterium pseudocatenulatum CECT7765 promotes a TLR2-dependent anti-inflammatory response in intestinal lymphocytes from mice with cirrhosis	Moratalla A	Eur J Nutr	2016	10.1007/s00394-015-0837-x
25822866	non-human	Effect of long-term acid gastric inhibition on bacterial translocation in cirrhotic rats	Sánchez E	Eur J Gastroenterol Hepatol	2015	10.1097/MEG.0000000000000319
32671585	non-human	Transcriptomic Profiling Identifies Novel Hepatic and Intestinal Genes Following Chronic Plus Binge Ethanol Feeding in Mice	Jiang L	Dig Dis Sci	2020	10.1007/s10620-020-06461-6
28815345	non-human	Mosapride Stabilizes Intestinal Microbiota to Reduce Bacterial Translocation and Endotoxemia in CCl(4)-Induced Cirrhotic Rats	Xu H	Dig Dis Sci	2017	10.1007/s10620-017-4704-x
33603089	non-human	RSPO4-CRISPR alleviates liver injury and restores gut microbiota in a rat model of liver fibrosis	Yu L	Commun Biol	2021	10.1038/s42003-021-01747-5
34870313	non-human	Microbiota transplants from feces or gut content attenuated portal hypertension and portosystemic collaterals in cirrhotic rats	Huang HC	Clin Sci (Lond)	2021	10.1042/CS20210602
34209524	non-human	Indole-3-Carboxaldehyde Restores Gut Mucosal Integrity and Protects from Liver Fibrosis in Murine Sclerosing Cholangitis	D'Onofrio F	Cells	2021	10.3390/cells10071622
31561561	non-human	TGR5 Activation Modulates an Inhibitory Effect on Liver Fibrosis Development Mediated by Anagliptin in Diabetic Rats	Kaya D	Cells	2019	10.3390/cells8101153
34062281	non-human	Nonalcoholic Steatohepatitis and HCC in a Hyperphagic Mouse Accelerated by Western Diet	Ganguly S	Cell Mol Gastroenterol Hepatol	2021	10.1016/j.jcmgh.2021.05.010
31470114	non-human	Impaired Intestinal Farnesoid X Receptor Signaling in Cystic Fibrosis Mice	Ikpa PT	Cell Mol Gastroenterol Hepatol	2020	10.1016/j.jcmgh.2019.08.006
33858327	non-human	Defining the temporal evolution of gut dysbiosis and inflammatory responses leading to hepatocellular carcinoma in Mdr2 -/- mouse model	Behary J	BMC Microbiol	2021	10.1186/s12866-021-02171-9
26682925	non-human	DSS colitis promotes tumorigenesis and fibrogenesis in a choline-deficient high-fat diet-induced NASH mouse model	Achiwa K	Biochem Biophys Res Commun	2016	10.1016/j.bbrc.2015.12.012
29847162	non-human	Colonic indole, gut bacteria metabolite of tryptophan, increases portal blood pressure in rats	Huc T	Am J Physiol Regul Integr Comp Physiol	2018	10.1152/ajpregu.00111.2018
32597709	non-human	Broad-spectrum antibiotics alter the microbiome, increase intestinal fxr, and decrease hepatic steatosis in zebrafish short bowel syndrome	Maselli KM	Am J Physiol Gastrointest Liver Physiol	2020	10.1152/ajpgi.00119.2020
32516028	non-human	NOD2 in hepatocytes engages a liver-gut axis to protect against steatosis, fibrosis, and gut dysbiosis during fatty liver disease in mice	Cavallari JF	Am J Physiol Endocrinol Metab	2020	10.1152/ajpendo.00181.2020
29944388	non-human	β-Klotho deficiency shifts the gut-liver bile acid axis and induces hepatic alterations in mice	Somm E	Am J Physiol Endocrinol Metab	2018	10.1152/ajpendo.00182.2018
28711154	non-human	Western Diet-Induced Dysbiosis in Farnesoid X Receptor Knockout Mice Causes Persistent Hepatic Inflammation after Antibiotic Treatment	Jena PK	Am J Pathol	2017	10.1016/j.ajpath.2017.04.019
33024394	non-human	Granulocyte-macrophage colony-stimulating factor protects mice against hepatocellular carcinoma by ameliorating intestinal dysbiosis and attenuating inflammation	Wu YN	World J Gastroenterol	2020	10.3748/wjg.v26.i36.5420
33811139	non-human	Active p38α causes macrovesicular fatty liver in mice	Darlyuk-Saadon I	Proc Natl Acad Sci U S A	2021	10.1073/pnas.2018069118
26884164	non-human	Probiotics modulated gut microbiota suppresses hepatocellular carcinoma growth in mice	Li J	Proc Natl Acad Sci U S A	2016	10.1073/pnas.1518189113
32559205	non-human	Fermentable fiber-induced hepatocellular carcinoma in mice recapitulates gene signatures found in human liver cancer	Chandrashekar DS	PLoS One	2020	10.1371/journal.pone.0234726
29515780	non-human	Bile acid metabolism regulated by the gut microbiota promotes non-alcoholic steatohepatitis-associated hepatocellular carcinoma in mice	Yamada S	Oncotarget	2018	10.18632/oncotarget.24066
31779128	non-human	Dietary Recombinant Phycoerythrin Modulates the Gut Microbiota of H22 Tumor-Bearing Mice	Qi H	Mar Drugs	2019	10.3390/md17120665
21080729	non-human	Systems responses of rats to aflatoxin B1 exposure revealed with metabonomic changes in multiple biological matrices	Zhang L	J Proteome Res	2011	10.1021/pr100792q
34737604	non-human	Curcumae Ameliorates Diethylnitrosamine-Induced Hepatocellular Carcinoma via Alteration of Oxidative Stress, Inflammation and Gut Microbiota	Zhang Y	J Inflamm Res	2021	10.2147/JIR.S330499
28370258	non-human	Polyphenic trait promotes liver cancer in a model of epigenetic instability in mice	Cassano M	Hepatology	2017	10.1002/hep.29182
32223398	non-human	Vancomycin prevents fermentable fiber-induced liver cancer in mice with dysbiotic gut microbiota	Singh V	Gut Microbes	2020	10.1080/19490976.2020.1743492
29867896	non-human	Different Sex-Based Responses of Gut Microbiota During the Development of Hepatocellular Carcinoma in Liver-Specific Tsc1-Knockout Mice	Huang R	Front Microbiol	2018	10.3389/fmicb.2018.01008
34397053	non-human	Selenium-rich royal jelly inhibits hepatocellular carcinoma through PI3K/AKT and VEGF pathways in H22 tumor-bearing mice	Chi X	Food Funct	2021	10.1039/d1fo01070k
34757071	non-human	Metformin inhibits tumor growth and affects intestinal flora in diabetic tumor-bearing mice	Kang J	Eur J Pharmacol	2021	10.1016/j.ejphar.2021.174605
32871519	non-human	Microcystis toxin-mediated tumor promotion and toxicity lead to shifts in mouse gut microbiome	Lee J	Ecotoxicol Environ Saf	2020	10.1016/j.ecoenv.2020.111204
31950772	non-human	Combination of Probiotics and Salvia miltiorrhiza Polysaccharide Alleviates Hepatic Steatosis via Gut Microbiota Modulation and Insulin Resistance Improvement in High Fat-Induced NAFLD Mice	Wang W	Diabetes Metab J	2020	10.4093/dmj.2019.0042
30325408	non-human	Liver tumorigenesis is promoted by a high saturated fat diet specifically in male mice and is associated with hepatic expression of the proto-oncogene Agap2 and enrichment of the intestinal microbiome with Coprococcus	Pedersen KB	Carcinogenesis	2019	10.1093/carcin/bgy141
30446518	non-human	Dietary Tomato Powder Inhibits High-Fat Diet-Promoted Hepatocellular Carcinoma with Alteration of Gut Microbiota in Mice Lacking Carotenoid Cleavage Enzymes	Xia H	Cancer Prev Res (Phila)	2018	10.1158/1940-6207.CAPR-18-0188
30357543	non-human	Gut microbiome disruption altered the biotransformation and liver toxicity of arsenic in mice	Chi L	Arch Toxicol	2019	10.1007/s00204-018-2332-7
34199786	non-human	Effects of C60 Fullerene on Thioacetamide-Induced Rat Liver Toxicity and Gut Microbiome Changes	Đurašević S	Antioxidants (Basel)	2021	10.3390/antiox10060911
32200644	non-human	Fermentable fibers induce rapid macro- and micronutrient depletion in Toll-like receptor 5-deficient mice	Golonka RM	Am J Physiol Gastrointest Liver Physiol	2020	10.1152/ajpgi.00349.2019
33225985	no metadata	Integrated analysis of microbiome and host transcriptome reveals correlations between gut microbiota and clinical outcomes in HBV-related hepatocellular carcinoma	Huang H	Genome Med	2020	10.1186/s13073-020-00796-5
33889550	no metadata	Impact of the Gut Microbiome on the Progression of Hepatitis B Virus Related Acute-on-Chronic Liver Failure	Yao X	Front Cell Infect Microbiol	2021	10.3389/fcimb.2021.573923
32585997	no metadata	Changes in the Intestinal Microbiome during a Multispecies Probiotic Intervention in Compensated Cirrhosis	Horvath A	Nutrients	2020	10.3390/nu12061874
33547384	not 16S rRNA	Meta-omics characteristics of intestinal microbiota associated to HBeAg seroconversion induced by oral antiviral therapy	Zeng YL	Sci Rep	2021	10.1038/s41598-021-82939-1
34690796	not 16S rRNA	The Microbiome in Autoimmune Liver Diseases: Metagenomic and Metabolomic Changes	Zheng Y	Front Physiol	2021	10.3389/fphys.2021.715852
27115650	not 16S rRNA	Big Data, Evolution, and Metagenomes: Predicting Disease from Gut Microbiota Codon Usage Profiles	Fabijanić M	Methods Mol Biol	2016	10.1007/978-1-4939-3572-7_26
32998876	not 16S rRNA	Interaction of bacterial metagenome and virome in patients with cirrhosis and hepatic encephalopathy	Bajaj JS	Gut	2021	10.1136/gutjnl-2020-322470
32265857	included_PRJNA558158	Featured Gut Microbiomes Associated With the Progression of Chronic Hepatitis B Disease	Chen Z	Front Microbiol	2020	10.3389/fmicb.2020.00383
32281295	included_PRJNA540574	Liver cirrhosis contributes to the disorder of gut microbiota in patients with hepatocellular carcinoma	Zheng R	Cancer Med	2020	10.1002/cam4.3045
31293562	included_PRJNA478823	Analysis of the Relationship Between the Degree of Dysbiosis in Gut Microbiota and Prognosis at Different Stages of Primary Hepatocellular Carcinoma	Ni J	Front Microbiol	2019	10.3389/fmicb.2019.01458
29780327	included_PRJNA445763	Small Bowel Transit and Altered Gut Microbiota in Patients With Liver Cirrhosis	Liu Y	Front Physiol	2018	10.3389/fphys.2018.00470
30675188	included_PRJNA428932	Alteration in gut microbiota associated with hepatitis B and non-hepatitis virus related hepatocellular carcinoma	Liu Q	Gut Pathog	2019	10.1186/s13099-018-0281-6
29180991	included_PRJNA382861	Gut Microbial Dysbiosis Is Associated with Altered Hepatic Functions and Serum Metabolites in Chronic Hepatitis B Patients	Wang J	Front Microbiol	2017	10.3389/fmicb.2017.02222
31387054	fatty liver disease	The combination of Ilexhainanoside D and ilexsaponin A(1) reduces liver inflammation and improves intestinal barrier function in mice with high-fat diet-induced non-alcoholic fatty liver disease	Zhao W	Phytomedicine	2019	10.1016/j.phymed.2019.153039
31943701	fatty liver disease	Cytolysin-positive Enterococcus faecalis is not increased in patients with non-alcoholic steatohepatitis	Lang S	Liver Int	2020	10.1111/liv.14377
31272028	fatty liver disease	1-Deoxynojirimycin improves high fat diet-induced nonalcoholic steatohepatitis by restoring gut dysbiosis	Zheng J	J Nutr Biochem	2019	10.1016/j.jnutbio.2019.05.013
26430807	fatty liver disease	Gut-derived lymphocyte recruitment to liver and induce liver injury in non-alcoholic fatty liver disease mouse model	Hu Y	J Gastroenterol Hepatol	2016	10.1111/jgh.13183
34993216	fatty liver disease	Alterations in the Gut Microbiota and Hepatitis-B-Virus Infection in Southern Chinese Patients With Coexisting Non-Alcoholic Fatty Liver Disease and Type-2 Diabetes Mellitus	Han W	Front Med (Lausanne)	2021	10.3389/fmed.2021.805029
28467925	fatty liver disease	Gut Microbiome-Based Metagenomic Signature for Non-invasive Detection of Advanced Fibrosis in Human Nonalcoholic Fatty Liver Disease	Loomba R	Cell Metab	2017	10.1016/j.cmet.2017.04.001
34741331	fatty liver disease	Letter: cross-linkage between bacterial taxonomy and gene functions-a study of metagenome-assembled genomes of gut microbiota in adult non-alcoholic fatty liver disease	Han W	Aliment Pharmacol Ther	2021	10.1111/apt.16628
34225424	fatty liver disease	[Role of gut-liver-immune axis in the pathogenesis of nonalcoholic steatohepatitis]	Shao L	Zhonghua Gan Zang Bing Za Zhi	2021	10.3760/cma.j.cn501113-20210430-00215
26052375	fatty liver disease	Pathophysiological mechanisms involved in non-alcoholic steatohepatitis and novel potential therapeutic targets	Higuera-de la Tijera F	World J Hepatol	2015	10.4254/wjh.v7.i10.1297
29930468	fatty liver disease	Dynamic alterations in the gut microbiota and metabolome during the development of methionine-choline-deficient diet-induced nonalcoholic steatohepatitis	Ye JZ	World J Gastroenterol	2018	10.3748/wjg.v24.i23.2468
28705785	fatty liver disease	Determination of certain bacterial groups in gut microbiota and endotoxin levels in patients with nonalcoholic steatohepatitis	Özkul C	Turk J Gastroenterol	2017	10.5152/tjg.2017.17033
32523101	fatty liver disease	Prediction of advanced fibrosis in non-alcoholic fatty liver disease using gut microbiota-based approaches compared with simple non-invasive tools	Lang S	Sci Rep	2020	10.1038/s41598-020-66241-0
29101772	fatty liver disease	Liver disease symptoms in non-alcoholic fatty liver disease and small intestinal bacterial overgrowth	Rafiei R	Rom J Intern Med	2018	10.1515/rjim-2017-0042
30690636	fatty liver disease	Interactions between the cecal microbiota and non-alcoholic steatohepatitis using laying hens as the model	Hamid H	Poult Sci	2019	10.3382/ps/pey596
24983359	fatty liver disease	L-carnitine prevents progression of non-alcoholic steatohepatitis in a mouse model with upregulation of mitochondrial pathway	Ishikawa H	PLoS One	2014	10.1371/journal.pone.0100627
31777715	fatty liver disease	New Perspectives in Pediatric Nonalcoholic Fatty Liver Disease: Epidemiology, Genetics, Diagnosis, and Natural History	Ko JS	Pediatr Gastroenterol Hepatol Nutr	2019	10.5223/pghn.2019.22.6.501
34579068	fatty liver disease	The Effect of Probiotics (MCP(®) BCMC(®) Strains) on Hepatic Steatosis, Small Intestinal Mucosal Immune Function, and Intestinal Barrier in Patients with Non-Alcoholic Fatty Liver Disease	Mohamad Nor MH	Nutrients	2021	10.3390/nu13093192
33126575	fatty liver disease	Vitamin D and Metabolic Dysfunction-Associated Fatty Liver Disease (MAFLD): An Update	Barchetta I	Nutrients	2020	10.3390/nu12113302
29401710	fatty liver disease	Dietary Iron Supplementation Alters Hepatic Inflammation in a Rat Model of Nonalcoholic Steatohepatitis	Atarashi M	Nutrients	2018	10.3390/nu10020175
27367724	fatty liver disease	Beneficial Effect of Synbiotic Supplementation on Hepatic Steatosis and Anthropometric Parameters, But Not on Gut Permeability in a Population with Nonalcoholic Steatohepatitis	Ferolla SM	Nutrients	2016	10.3390/nu8070397
30298840	fatty liver disease	[Gut microbiota and nonalcoholic steatohepatitis]	Kessoku T	Nihon Yakurigaku Zasshi	2018	10.1254/fpj.152.187
32267638	fatty liver disease	[Non-alcoholic fatty liver disease; a full-bodied epidemic]	Tushuizen ME	Ned Tijdschr Geneeskd	2020
33420074	fatty liver disease	Gut microbiota impact on the peripheral immune response in non-alcoholic fatty liver disease related hepatocellular carcinoma	Behary J	Nat Commun	2021	10.1038/s41467-020-20422-7
30926798	fatty liver disease	A gut microbiome signature for cirrhosis due to nonalcoholic fatty liver disease	Caussy C	Nat Commun	2019	10.1038/s41467-019-09455-9
27617201	fatty liver disease	Non-alcoholic fatty liver and the gut microbiota	Bashiardes S	Mol Metab	2016	10.1016/j.molmet.2016.06.003
34870138	fatty liver disease	Metabolic causes and consequences of nonalcoholic fatty liver disease (NAFLD)	Zarghamravanbakhsh P	Metabol Open	2021	10.1016/j.metop.2021.100149
32243703	fatty liver disease	Bile acids associate with specific gut microbiota, low-level alcohol consumption and liver fibrosis in patients with non-alcoholic fatty liver disease	Adams LA	Liver Int	2020	10.1111/liv.14453
30919578	fatty liver disease	Faecal microbiota from patients with cirrhosis has a low capacity to ferment non-digestible carbohydrates into short-chain fatty acids	Jin M	Liver Int	2019	10.1111/liv.14106
33709477	fatty liver disease	Gut microbiota composition associated with hepatic fibrosis in non-obese patients with non-alcoholic fatty liver disease	Iwaki M	J Gastroenterol Hepatol	2021	10.1111/jgh.15487
34830313	fatty liver disease	Aryl Hydrocarbon Receptor (AhR) Activation by 2,3,7,8-Tetrachlorodibenzo-p-Dioxin (TCDD) Dose-Dependently Shifts the Gut Microbiome Consistent with the Progression of Non-Alcoholic Fatty Liver Disease	Fling RR	Int J Mol Sci	2021	10.3390/ijms222212431
30646522	fatty liver disease	Intestinal Microbiota Protects against MCD Diet-Induced Steatohepatitis	Schneider KM	Int J Mol Sci	2019	10.3390/ijms20020308
33490737	fatty liver disease	Gut microbiota and their metabolites in the progression of non-alcoholic fatty liver disease	Zhou J	Hepatoma Res	2021	10.20517/2394-5079.2020.134
33185911	fatty liver disease	Neutral Ceramidase Mediates Nonalcoholic Steatohepatitis by Regulating Monounsaturated Fatty Acids and Gut IgA(+) B Cells	Gu X	Hepatology	2021	10.1002/hep.31628
29665135	fatty liver disease	Hepatocellular Carcinoma Is Associated With Gut Microbiota Profile and Inflammation in Nonalcoholic Fatty Liver Disease	Ponziani FR	Hepatology	2019	10.1002/hep.30036
31696774	fatty liver disease	Lower gut microbiome diversity and higher abundance of proinflammatory genus Collinsella are associated with biopsy-proven nonalcoholic steatohepatitis	Astbury S	Gut Microbes	2020	10.1080/19490976.2019.1681861
32652145	fatty liver disease	Intestinal Virome Signature Associated With Severity of Nonalcoholic Fatty Liver Disease	Lang S	Gastroenterology	2020	10.1053/j.gastro.2020.07.005
31255652	fatty liver disease	Microbiome Signatures Associated With Steatohepatitis and Moderate to Severe Fibrosis in Children With Nonalcoholic Fatty Liver Disease	Schwimmer JB	Gastroenterology	2019	10.1053/j.gastro.2019.06.028
34721326	fatty liver disease	Disentangling the Progression of Non-alcoholic Fatty Liver Disease in the Human Gut Microbiota	Wang T	Front Microbiol	2021	10.3389/fmicb.2021.728823
32685936	fatty liver disease	Nonalcoholic fatty liver disease and portal hypertension	Ryou M	Explor Med	2020	10.37349/emed.2020.00011
28253210	fatty liver disease	The association of nonalcoholic fatty liver disease with genetic polymorphisms: a multicenter study	Uygun A	Eur J Gastroenterol Hepatol	2017	10.1097/MEG.0000000000000813
33787507	fatty liver disease	Modulation of serotonin in the gut-liver neural axis ameliorates the fatty and fibrotic changes in non-alcoholic fatty liver	Ko M	Dis Model Mech	2021	10.1242/dmm.048922
34222711	fatty liver disease	Pediatric nonalcoholic fatty liver disease and the microbiome: Mechanisms contributing to pathogenesis and progression	Salzman NH	Curr Opin Endocr Metab Res	2021	10.1016/j.coemr.2021.05.003
29787859	fatty liver disease	Design and rationale of the INSYTE study: A randomised, placebo controlled study to test the efficacy of a synbiotic on liver fat, disease biomarkers and intestinal microbiota in non-alcoholic fatty liver disease	Scorletti E	Contemp Clin Trials	2018	10.1016/j.cct.2018.05.010
26867181	fatty liver disease	Intestinal REG3 Lectins Protect against Alcoholic Steatohepatitis by Reducing Mucosa-Associated Microbiota and Preventing Bacterial Translocation	Wang L	Cell Host Microbe	2016	10.1016/j.chom.2016.01.003
30894137	fatty liver disease	The role of Small Intestinal Bacterial Overgrowth (SIBO) in Non-alcoholic Fatty Liver Disease (NAFLD) patients evaluated using Controlled Attenuation Parameter (CAP) Transient Elastography (TE): a tertiary referral center experience	Fitriakusumah Y	BMC Gastroenterol	2019	10.1186/s12876-019-0960-x
26635079	fatty liver disease	Gut microbiota manipulation with prebiotics in patients with non-alcoholic fatty liver disease: a randomized controlled trial protocol	Lambert JE	BMC Gastroenterol	2015	10.1186/s12876-015-0400-5
28086768	fatty liver disease	Probiotic mixture improves fatty liver disease by virtue of its action on lipid profiles, leptin, and inflammatory biomarkers	Al-Muzafar HM	BMC Complement Altern Med	2017	10.1186/s12906-016-1540-z
28430371	fatty liver disease	Evaluation of circulating zonulin as a potential marker in the pathogenesis of nonalcoholic fatty liver disease	Hendy OM	APMIS	2017	10.1111/apm.12696
34164507	fatty liver disease	Butyrate ameliorates alcoholic fatty liver disease via reducing endotoxemia and inhibiting liver gasdermin D-mediated pyroptosis	Zhang T	Ann Transl Med	2021	10.21037/atm-21-2158
31558417	fatty liver disease	Characteristics of intestinal bacteria with fatty liver diseases and cirrhosis	Guohong-Liu	Ann Hepatol	2019	10.1016/j.aohep.2019.06.020
25428903	fatty liver disease	Mosapride citrate improves nonalcoholic steatohepatitis with increased fecal lactic acid bacteria and plasma glucagon-like peptide-1 level in a rodent model	Okubo H	Am J Physiol Gastrointest Liver Physiol	2015	10.1152/ajpgi.00198.2014
30882489	fatty liver disease	Monocyte-macrophage activation is associated with nonalcoholic fatty liver disease and liver fibrosis in HIV monoinfection independently of the gut microbiome and bacterial translocation	Maurice JB	AIDS	2019	10.1097/QAD.0000000000002133
30416839	fatty liver disease	Gut microbiota, fatty liver disease, and hepatocellular carcinoma	Chu H	Liver Res	2018	10.1016/j.livres.2017.11.005
30279623	fatty liver disease	Nrf2-mediated anti-oxidant effects contribute to suppression of non-alcoholic steatohepatitis-associated hepatocellular carcinoma in murine model	Yamada S	J Clin Biochem Nutr	2018	10.3164/jcbn.17-125
31867441	fatty liver disease	Molecular links between non-alcoholic fatty liver disease and hepatocellular carcinoma	Raza S	Hepatoma Res	2019	10.20517/2394-5079.2019.014
32694178	fatty liver disease	Dietary cholesterol drives fatty liver-associated liver cancer by modulating gut microbiota and metabolites	Zhang X	Gut	2021	10.1136/gutjnl-2019-319664
32417163	fatty liver disease	Potential role of gut microbiota, the proto-oncogene PIKE (Agap2) and cytochrome P450 CYP2W1 in promotion of liver cancer by alcoholic and nonalcoholic fatty liver disease and protection by dietary soy protein	Ronis MJ	Chem Biol Interact	2020	10.1016/j.cbi.2020.109131
25314080	fatty liver disease	Metabolic activation of intrahepatic CD8+ T cells and NKT cells causes nonalcoholic steatohepatitis and liver cancer via cross-talk with hepatocytes	Wolf MJ	Cancer Cell	2014	10.1016/j.ccell.2014.09.003
30717396	data not available	Alterations of the Gut Microbiome in Chronic Hepatitis B Virus Infection Associated with Alanine Aminotransferase Level	Yun Y	J Clin Med	2019	10.3390/jcm8020173
31925905	data not available	Modulation of bile acid profile by gut microbiota in chronic hepatitis B	Wang X	J Cell Mol Med	2020	10.1111/jcmm.14951
34717727	data not available	Relationship between gut microbiome diversity and hepatitis B viral load in patients with chronic hepatitis B	Joo EJ	Gut Pathog	2021	10.1186/s13099-021-00461-1
33117435	data not available	Potential role of intestinal microflora in disease progression among patients with different stages of Hepatitis B	Yang XA	Gut Pathog	2020	10.1186/s13099-020-00391-4
31788031	data not available	The intestinal microbial community dissimilarity in hepatitis B virus-related liver cirrhosis patients with and without at alcohol consumption	Deng YD	Gut Pathog	2019	10.1186/s13099-019-0337-2
34006193	data not available	Gut microbiota as prognosis markers for patients with HBV-related acute-on-chronic liver failure	Wang K	Gut Microbes	2021	10.1080/19490976.2021.1921925
32850467	data not available	Role of Microbiota in Pathogenesis and Management of Viral Hepatitis	Sehgal R	Front Cell Infect Microbiol	2020	10.3389/fcimb.2020.00341
20846815	data not available	Correlation between gastrointestinal fungi and varying degrees of chronic hepatitis B virus infection	Chen Y	Diagn Microbiol Infect Dis	2011	10.1016/j.diagmicrobio.2010.04.005
25667596	data not available	Urinary metabolite profiling offers potential for differentiation of liver-kidney yin deficiency and dampness-heat internal smoldering syndromes in posthepatitis B cirrhosis patients	Wang X	Evid Based Complement Alternat Med	2015	10.1155/2015/464969
26600967	data not available	Starring role of toll-like receptor-4 activation in the gut-liver axis	Carotti S	World J Gastrointest Pathophysiol	2015	10.4291/wjgp.v6.i4.99
29774155	data not available	Is de novo hepatocellular carcinoma after transjugular intrahepatic portosystemic shunt increased?	Hüsing-Kabar A	United European Gastroenterol J	2018	10.1177/2050640617732886
27687977	data not available	Dysbiosis of small intestinal microbiota in liver cirrhosis and its association with etiology	Chen Y	Sci Rep	2016	10.1038/srep34055
34684436	data not available	Maturation of the Visceral (Gut-Adipose-Liver) Network in Response to the Weaning Reaction versus Adult Age and Impact of Maternal High-Fat Diet	Guzzardi MA	Nutrients	2021	10.3390/nu13103438
30002342	data not available	Celiac Disease and Liver Disorders: From Putative Pathogenesis to Clinical Implications	Hoffmanová I	Nutrients	2018	10.3390/nu10070892
33846604	data not available	Does the epithelial barrier hypothesis explain the increase in allergy, autoimmunity and other chronic conditions?	Akdis CA	Nat Rev Immunol	2021	10.1038/s41577-021-00538-7
26758786	data not available	Immunology in the liver--from homeostasis to disease	Heymann F	Nat Rev Gastroenterol Hepatol	2016	10.1038/nrgastro.2015.200
23958600	data not available	The Gordian Knot of dysbiosis, obesity and NAFLD	Mehal WZ	Nat Rev Gastroenterol Hepatol	2013	10.1038/nrgastro.2013.146
33458949	data not available	Western Diet Aggravated Carbon Tetrachloride-Induced Chronic Liver Injury by Disturbing Gut Microbiota and Bile Acid Metabolism	Yang L	Mol Nutr Food Res	2021	10.1002/mnfr.202000811
32359213	data not available	Novel Strategies to Prevent Total Parenteral Nutrition-Induced Gut and Liver Inflammation, and Adverse Metabolic Outcomes	Lucchinetti E	Mol Nutr Food Res	2021	10.1002/mnfr.201901270
30667154	data not available	Protein-Bound β-glucan from Coriolus Versicolor has Potential for Use Against Obesity	Li X	Mol Nutr Food Res	2019	10.1002/mnfr.201801231
34442651	data not available	Gastrointestinal Diseases in Children Living with HIV	Basile FW	Microorganisms	2021	10.3390/microorganisms9081572
23504024	data not available	Assessment of microbiome variation during the perioperative period in liver transplant patients: a retrospective analysis	Lu H	Microb Ecol	2013	10.1007/s00248-013-0211-6
32185324	data not available	Enterococcus gallinarum as a component of the Autoinfectome: the gut-liver-autoimmune rheumatic disease axis is alive and kicking	Bogdanos DP	Mediterr J Rheumatol	2018	10.31138/mjr.29.4.187
32925716	data not available	Characterization of gut microbiota in patients with primary hepatocellular carcinoma received immune checkpoint inhibitors: A Chinese population-based study	Li L	Medicine (Baltimore)	2020	10.1097/MD.0000000000021788
31405111	data not available	Targeting Microbiota: What Do We Know about It at Present?	Derovs A	Medicina (Kaunas)	2019	10.3390/medicina55080459
32461811	data not available	The role of gut microbiota in liver disease development and treatment	Wang L	Liver Res	2019	10.1016/j.livres.2019.02.001
28321050	data not available	Alteration of gut microbial community after N,N-Dimethylformamide exposure	Zhang M	J Toxicol Sci	2017	10.2131/jts.42.241
26415102	data not available	Systematic transcriptome analysis reveals elevated expression of alcohol-metabolizing genes in NAFLD livers	Zhu R	J Pathol	2016	10.1002/path.4650
28483682	data not available	Intrahepatic CD206(+) macrophages contribute to inflammation in advanced viral-related liver disease	Tan-Garcia A	J Hepatol	2017	10.1016/j.jhep.2017.04.023
30871675	data not available	Bugs to debug? The exploration of gut microbiome in human health and diseases	Ni YH	J Formos Med Assoc	2019	10.1016/j.jfma.2019.01.017
32550192	data not available	The regulation of Niemann-Pick C1-Like 1 (NPC1L1) gene expression in opposite direction by Bacteroides spp. and related outer membrane vesicles in Caco-2 cell line	Badi SA	J Diabetes Metab Disord	2020	10.1007/s40200-020-00522-3
26191211	data not available	Abnormal intestinal permeability and microbiota in patients with autoimmune hepatitis	Lin R	Int J Clin Exp Pathol	2015
32734650	data not available	Metabolic perturbations prior to hepatocellular carcinoma diagnosis: Findings from a prospective observational cohort study	Stepien M	Int J Cancer	2021	10.1002/ijc.33236
29350768	data not available	Diet affects gut microbiota and modulates hospitalization risk differentially in an international cirrhosis cohort	Bajaj JS	Hepatology	2018	10.1002/hep.29791
31974041	data not available	Fecal microbiota transplantation has therapeutic effects on chronic hepatits B patients via altering composition of gut microbiota	Lou JM	Hepatobiliary Pancreat Dis Int	2020	10.1016/j.hbpd.2019.12.008
31003979	data not available	Fungi participate in the dysbiosis of gut microbiota in patients with primary sclerosing cholangitis	Lemoinne S	Gut	2020	10.1136/gutjnl-2018-317791
29150490	data not available	Gut roundtable meeting paper: selected recent advances in hepatocellular carcinoma	Gerbes A	Gut	2018	10.1136/gutjnl-2017-315068
25244414	data not available	Short-term probiotic therapy alleviates small intestinal bacterial overgrowth, but does not improve intestinal permeability in chronic liver disease	Kwak DS	Eur J Gastroenterol Hepatol	2014	10.1097/MEG.0000000000000214
26058107	data not available	[Disorders of gut microflora in the pathogenesis of liver cirrhosis and complications of portal hypertension]	Anikina EV	Eksp Klin Gastroenterol	2014
26068924	data not available	Defining the Role of Gut Bacteria in the Metabolism of Deleobuvir: In Vitro and In Vivo Studies	McCabe M	Drug Metab Dispos	2015	10.1124/dmd.115.064477
27170396	data not available	Liver Fibrosis: From Pathogenesis to Novel Therapies	Weiskirchen R	Dig Dis	2016	10.1159/000444556
26159264	data not available	Pathophysiology of Liver Fibrosis	Pinzani M	Dig Dis	2015	10.1159/000374096
23068014	data not available	Analysis of fecal microbiota, organic acids and plasma lipids in hepatic cancer patients with or without liver cirrhosis	Usami M	Clin Nutr	2013	10.1016/j.clnu.2012.09.010
33174157	data not available	Liver abscess caused by Cutibacterium namnetense after transarterial chemoembolization for hepatocellular carcinoma	Yasutomi E	Clin J Gastroenterol	2021	10.1007/s12328-020-01283-5
34469716	data not available	Myricetin supplementation decreases hepatic lipid synthesis and inflammation by modulating gut microbiota	Sun WL	Cell Rep	2021	10.1016/j.celrep.2021.109641
22952210	data not available	The great escape: microbiotal LPS takes a toll on the liver	Weiss DS	Cancer Prev Res (Phila)	2012	10.1158/1940-6207.CAPR-12-0248
33891996	data not available	Examining the gut-liver axis in liver cancer using organoid models	Shek D	Cancer Lett	2021	10.1016/j.canlet.2021.04.008
27223096	data not available	Intestinal infection associated with future onset of an anxiety disorder: Results of a nationally representative study	Bruch JD	Brain Behav Immun	2016	10.1016/j.bbi.2016.05.014
20510670	data not available	Studies on immunoproteasome in human liver. Part I: absence in fetuses, presence in normal subjects, and increased levels in chronic active hepatitis and cirrhosis	Vasuri F	Biochem Biophys Res Commun	2010	10.1016/j.bbrc.2010.05.104
23771520	data not available	Role of metabolism by intestinal microbiota in pharmacokinetics of oral baicalin	Kang MJ	Arch Pharm Res	2014	10.1007/s12272-013-0179-2
29469038	data not available	Bacterial Translocation Is Linked to Increased Intestinal IFN-γ, IL-4, IL-17, and mucin-2 in Cholestatic Rats	Vega-Magaña N	Ann Hepatol	2018	10.5604/01.3001.0010.8662
29804354	data not available	[Development and features of infection in patients with acute-on-chronic liver failure and its influence on disease progression and prognosis]	Cao ZJ	Zhonghua Gan Zang Bing Za Zhi	2018	10.3760/cma.j.issn.1007-3418.2018.01.003
33327006	data not available	[Proton Pump Inhibitors and their Microbiome-Mediated Side Effects]	Horvath A	Zentralbl Chir	2021	10.1055/a-1312-7587
32018318	data not available	[What the (abdominal) surgeon needs to know on novel insights regarding cholic acids and their interaction with the intestinal microbioma]	Schönfeld P	Z Gastroenterol	2020	10.1055/a-1071-8219
31293720	data not available	Proton pump inhibitors increase the severity of hepatic encephalopathy in cirrhotic patients	Fasullo M	World J Hepatol	2019	10.4254/wjh.v11.i6.522
26301048	data not available	Intestinal barrier dysfunction in cirrhosis: Current concepts in pathophysiology and clinical implications	Tsiaoussis GI	World J Hepatol	2015	10.4254/wjh.v7.i17.2058
31988585	data not available	Rifaximin improves survival in cirrhotic patients with refractory ascites: A real-world study	Lv XY	World J Gastroenterol	2020	10.3748/wjg.v26.i2.199
30228776	data not available	Clinical impact of microbiome in patients with decompensated cirrhosis	Oikonomou T	World J Gastroenterol	2018	10.3748/wjg.v24.i34.3813
29307995	data not available	Rifaximin ameliorates hepatic encephalopathy and endotoxemia without affecting the gut microbiome diversity	Kaji K	World J Gastroenterol	2017	10.3748/wjg.v23.i47.8355
27004006	data not available	Dual-sugar tests of small intestinal permeability are poor predictors of bacterial infections and mortality in cirrhosis: A prospective study	Vogt A	World J Gastroenterol	2016	10.3748/wjg.v22.i11.3275
26973391	data not available	Effect of artesunate supplementation on bacterial translocation and dysbiosis of gut microbiota in rats with liver cirrhosis	Chen YX	World J Gastroenterol	2016	10.3748/wjg.v22.i10.2949
34877269	data not available	Gut-liver axis in cirrhosis: Are hemodynamic changes a missing link?	Maslennikov R	World J Clin Cases	2021	10.12998/wjcc.v9.i31.9320
30618372	data not available	[The gut microbiome is important in chronic liver disease]	Christensen E	Ugeskr Laeger	2019
26926775	data not available	RiMINI - the influence of rifaximin on minimal hepatic encephalopathy (MHE) and on the intestinal microbiome in patients with liver cirrhosis: study protocol for a randomized controlled trial	Schulz C	Trials	2016	10.1186/s13063-016-1205-8
25728703	data not available	The relevance of intestinal dysbiosis in liver transplant candidates	Grąt M	Transpl Infect Dis	2015	10.1111/tid.12352
31582017	data not available	Involvement of TLR4/ CXCL9/ PREX-2 pathway in the development of hepatocellular carcinoma (HCC) and the promising role of early administration of lactobacillus plantarum in Wistar rats	Elshaer AM	Tissue Cell	2019	10.1016/j.tice.2019.07.010
33268324	data not available	Histologic and microbiological findings of the defunctionalized loop in sleeve gastrectomy with jejunal bypass	Sepúlveda M	Surg Obes Relat Dis	2021	10.1016/j.soard.2020.08.021
25231841	data not available	New avenues to treatment of liver cirrhosis	Wan X	Sci China Life Sci	2014	10.1007/s11427-014-4751-x
29903529	data not available	Intestinal microbiota assessment in cirrhotic patients from a Mexican mestizo population	Pérez-Monter C	Rev Gastroenterol Mex (Engl Ed)	2019	10.1016/j.rgmx.2018.02.010
33348106	data not available	Alterations of intestinal microbiota in liver cirrhosis with muscle wasting	Ren X	Nutrition	2021	10.1016/j.nut.2020.111081
32498372	data not available	A Double-Blind, Randomized Placebo-Controlled Trial of Probiotic Lactobacillus casei Shirota in Stable Cirrhotic Patients	Macnaughtan J	Nutrients	2020	10.3390/nu12061651
29482963	data not available	Gut microbiome composition in lean patients with NASH is associated with liver damage independent of caloric intake: A prospective pilot study	Duarte SMB	Nutr Metab Cardiovasc Dis	2018	10.1016/j.numecd.2017.10.014
23848072	data not available	[Probiotics in liver diseases]	Soriano G	Nutr Hosp	2013	10.3305/nh.2013.28.3.6602
25079328	data not available	Alterations of the human gut microbiome in liver cirrhosis	Qin N	Nature	2014	10.1038/nature13568
33258263	data not available	Active Vitamin D(3) Treatment Attenuated Bacterial Translocation via Improving Intestinal Barriers in Cirrhotic Rats	Lee PC	Mol Nutr Food Res	2021	10.1002/mnfr.202000937
28840806	data not available	Microbiota, Liver Diseases, and Alcohol	Cassard AM	Microbiol Spectr	2017	10.1128/microbiolspec.BAD-0007-2016
33653893	data not available	Fusobacterium nucleatum Secretes Outer Membrane Vesicles and Promotes Intestinal Inflammation	Engevik MA	mBio	2021	10.1128/mBio.02706-20
33492761	data not available	Gut Microbial Signature of Hepatocellular Cancer in Men With Cirrhosis	Albhaisi S	Liver Transpl	2021	10.1002/lt.25994
28240840	data not available	Liver transplant modulates gut microbial dysbiosis and cognitive function in cirrhosis	Bajaj JS	Liver Transpl	2017	10.1002/lt.24754
33894097	data not available	A nonbile acid farnesoid X receptor agonist tropifexor potently inhibits cholestatic liver injury and fibrosis by modulating the gut-liver axis	Xiao Y	Liver Int	2021	10.1111/liv.14906
33713524	data not available	Characterization of the gut-liver-muscle axis in cirrhotic patients with sarcopenia	Ponziani FR	Liver Int	2021	10.1111/liv.14876
32181561	data not available	Cognition and hospitalizations are linked with salivary and faecal microbiota in cirrhosis cohorts from the USA and Mexico	Bajaj JS	Liver Int	2020	10.1111/liv.14437
30735608	data not available	Autotaxin, bile acid profile and effect of ileal bile acid transporter inhibition in primary biliary cholangitis patients with pruritus	Hegade VS	Liver Int	2019	10.1111/liv.14069
24840789	data not available	Breaking bad - the two sides of gut microbiota in portal hypertension	Mehta G	Liver Int	2014	10.1111/liv.12598
24836902	data not available	The chronic use of beta-blockers and proton pump inhibitors may affect the rate of bacterial infections in cirrhosis	Merli M	Liver Int	2015	10.1111/liv.12593
24267920	data not available	Protective effect of Bifidobacterium pseudocatenulatum CECT7765 against induced bacterial antigen translocation in experimental cirrhosis	Moratalla A	Liver Int	2014	10.1111/liv.12380
30539636	data not available	Metabolic Signature of Primary Biliary Cholangitis and Its Comparison with Celiac Disease	Vignoli A	J Proteome Res	2019	10.1021/acs.jproteome.8b00849
28195067	data not available	The effect of short term treatment with probiotic VSL#3 on various clinical and biochemical parameters in patients with liver cirrhosis	Marlicz W	J Physiol Pharmacol	2016
32387002	data not available	Administration of a mixture of triterpenoids from yeyachun and phenolic acids from danshen ameliorates carbon tetrachloride-induced liver fibrosis in mice by the regulation of intestinal flora	Tan Y	J Pharmacol Sci	2020	10.1016/j.jphs.2020.04.007
33427793	data not available	Gut Microbiome: A Potential Modifiable Risk Factor in Biliary Atresia	Jain V	J Pediatr Gastroenterol Nutr	2021	10.1097/MPG.0000000000002973
25305707	data not available	Application of next-generation sequencing to study ascitic microbiome in cirrhotic patients with or without spontaneous bacterial peritonitis	Feng Y	J Microbiol Immunol Infect	2015	10.1016/j.jmii.2014.07.005
32705087	data not available	Role of Bile Acids and Gut Microbiota in Parenteral Nutrition Associated Injury	Manithody CS	J Hum Nutr (Carson City)	2020	10.36959/487/286
32197802	data not available	Reply to: " 'You know my name, but not my story' - Deciding on an accurate nomenclature for faecal microbiota transplantation": Intestinal microbiota transplantation: Naming a new paradigm	Khoruts A	J Hepatol	2020	10.1016/j.jhep.2020.02.014
31295531	data not available	FXR modulates the gut-vascular barrier by regulating the entry sites for bacterial translocation in experimental cirrhosis	Sorribas M	J Hepatol	2019	10.1016/j.jhep.2019.06.017
28716745	data not available	Gut-derived endotoxin stimulates factor VIII secretion from endothelial cells. Implications for hypercoagulability in cirrhosis	Carnevale R	J Hepatol	2017	10.1016/j.jhep.2017.07.002
27981305	data not available	Association of Enteric Protist Blastocystis spp. and Gut Microbiota with Hepatic Encephalopathy	Yildiz S	J Gastrointestin Liver Dis	2016	10.15403/jgld.2014.1121.254.yiz
31448533	data not available	Lactulose improves cognition, quality of life, and gut microbiota in minimal hepatic encephalopathy: A multicenter, randomized controlled trial	Wang JY	J Dig Dis	2019	10.1111/1751-2980.12816
26447960	data not available	Role of Gut Microbiota in Liver Disease	Brenner DA	J Clin Gastroenterol	2015	10.1097/MCG.0000000000000391
25755571	data not available	Gut microbiome and liver diseases	Shalimar	J Clin Exp Hepatol	2014	10.1016/j.jceh.2014.08.010
33426540	data not available	Maternal Diet Alters Trained Immunity in the Pathogenesis of Pediatric NAFLD	Jonscher KR	J Cell Immunol	2020	10.33696/immunology.2.061
34415764	data not available	Ginsenoside Rk3 Suppresses Hepatocellular Carcinoma Development through Targeting the Gut-Liver Axis	Qu L	J Agric Food Chem	2021	10.1021/acs.jafc.1c03279
33967143	data not available	Cartilage-hair Hypoplasia Complicated with Liver Cirrhosis Due to Chronic Intrahepatic Cholestasis	Kogami T	Intern Med	2021	10.2169/internalmedicine.7483-21
32879200	data not available	Exploratory Research on the Relationship between Human Gut Microbiota and Portal Hypertension	Yokoyama K	Intern Med	2020	10.2169/internalmedicine.4628-20
33771232	data not available	Gut microbiota signatures in Schistosoma japonicum infection-induced liver cirrhosis patients: a case-control study	Gui QF	Infect Dis Poverty	2021	10.1186/s40249-021-00821-8
30474827	data not available	Preliminary experience with single fecal microbiota transplant for treatment of recurrent overt hepatic encephalopathy-A case series	Mehta R	Indian J Gastroenterol	2018	10.1007/s12664-018-0906-1
35023891	data not available	Decreased diversity of salivary microbiome in patients with stable decompensated cirrhosis	Oikonomou T	Hippokratia	2020
31298745	data not available	Characterization of Gut Microbiota, Bile Acid Metabolism, and Cytokines in Intrahepatic Cholangiocarcinoma	Jia X	Hepatology	2020	10.1002/hep.30852
30737805	data not available	Reply	Albillos A	Hepatology	2019	10.1002/hep.30554
25998053	data not available	Salivary microbiota-immune profiling in cirrhosis: could this be the noninvasive strategy that will revolutionize prognostication in hepatology?	Patel VC	Hepatology	2015	10.1002/hep.27870
21574172	data not available	Characterization of fecal microbial communities in patients with liver cirrhosis	Chen Y	Hepatology	2011	10.1002/hep.24423
30589492	data not available	Rifaximin-altered gut microbiota components associated with liver/neuropsychological functions in patients with hepatic encephalopathy: An exploratory data analysis of phase II/III clinical trials	Kawaguchi T	Hepatol Res	2019	10.1111/hepr.13300
23332087	data not available	Liver and diabetes. A vicious circle	Loria P	Hepatol Res	2013	10.1111/j.1872-034X.2012.01031.x
33479868	data not available	Is it time to spit? More evidence for the oral-gut-liver axis in liver disease	Acharya C	Hepatol Int	2021	10.1007/s12072-021-10136-3
32949377	data not available	Alterations of the salivary and fecal microbiome in patients with primary sclerosing cholangitis	Lapidot Y	Hepatol Int	2021	10.1007/s12072-020-10089-z
31290070	data not available	Bacteroides in colonic mucosa-associated microbiota affects the development of minimal hepatic encephalopathy in patients with cirrhosis	Haraguchi M	Hepatol Int	2019	10.1007/s12072-019-09963-2
30737678	data not available	Influence of proton pump inhibitors on microbiota in chronic liver disease patients	Yamamoto K	Hepatol Int	2019	10.1007/s12072-019-09932-9
28550391	data not available	Gut-liver axis, cirrhosis and portal hypertension: the chicken and the egg	Arab JP	Hepatol Int	2018	10.1007/s12072-017-9798-x
25436359	data not available	Gut microbiota in cirrhotic liver transplant candidates	Grąt M	Hepatogastroenterology	2014
30661942	data not available	Relationship between intestinal microbial dysbiosis and primary liver cancer	Zhang L	Hepatobiliary Pancreat Dis Int	2019	10.1016/j.hbpd.2019.01.002
23851335	data not available	Cirrhosis, bile acids and gut microbiota: unraveling a complex relationship	Ridlon JM	Gut Microbes	2013	10.4161/gmic.25723
32503844	data not available	Neither black nor white: do altered intestinal microbiota reflect chronic liver disease severity?	Goeser F	Gut	2021	10.1136/gutjnl-2020-321424
28213609	data not available	Gut microbial profile is altered in primary biliary cholangitis and partially restored after UDCA therapy	Tang R	Gut	2018	10.1136/gutjnl-2016-313332
27654586	data not available	Gut microbiota and Toll-like receptors set the stage for cytokine-mediated failure of antibacterial responses in the fibrotic liver	Kuntzen C	Gut	2017	10.1136/gutjnl-2016-312486
27432540	data not available	Gut microbial translocation corrupts myeloid cell function to control bacterial infection during liver cirrhosis	Hackstein CP	Gut	2017	10.1136/gutjnl-2015-311224
33857456	data not available	Impact of Antibiotic Resistance Genes in Gut Microbiome of Patients With Cirrhosis	Shamsaddini A	Gastroenterology	2021	10.1053/j.gastro.2021.04.013
27639806	data not available	Proton Pump Inhibitors Increase Risk for Hepatic Encephalopathy in Patients With Cirrhosis in A Population Study	Tsai CF	Gastroenterology	2017	10.1053/j.gastro.2016.09.007
25457846	data not available	Microbial therapy in liver disease: probiotics probe the microbiome-gut-liver-brain axis	Victor DW 3rd	Gastroenterology	2014	10.1053/j.gastro.2014.10.023
32662659	data not available	Characteristics of three microbial colonization states in the duodenum of the cirrhotic patients	Zha H	Future Microbiol	2020	10.2217/fmb-2019-0270
30619141	data not available	Abnormal Gut Microbiota Metabolism Specific for Liver Cirrhosis	Wei X	Front Microbiol	2018	10.3389/fmicb.2018.03051
33391185	data not available	Frequency and Causes of False-Positive Elevated Plasma Concentrations of Fasting Gut Hormones in a Specialist Neuroendocrine Tumor Center	Butler OL	Front Endocrinol (Lausanne)	2020	10.3389/fendo.2020.606264
33836051	data not available	Short-chain fatty acid and fecal microbiota profiles are linked to fibrosis in primary biliary cholangitis	Lammert C	FEMS Microbiol Lett	2021	10.1093/femsle/fnab038
22092561	data not available	Bacterial translocation in cirrhosis is not caused by an abnormal small bowel gut microbiota	Steed H	FEMS Immunol Med Microbiol	2011	10.1111/j.1574-695X.2011.00857.x
31345057	data not available	Circulating levels of butyrate are inversely related to portal hypertension, endotoxemia, and systemic inflammation in patients with cirrhosis	Juanola O	FASEB J	2019	10.1096/fj.201901327R
30791837	data not available	Is treating the gut microbiome the key to achieving better outcomes in cirrhosis?	Hatton G	Expert Rev Gastroenterol Hepatol	2019	10.1080/17474124.2019.1543587
25846450	data not available	Is it time to target gut dysbiosis and immune dysfunction in the therapy of hepatic encephalopathy?	Shawcross DL	Expert Rev Gastroenterol Hepatol	2015	10.1586/17474124.2015.1035257
29201193	data not available	Effect of different treatments and alcohol addiction on gut microbiota in minimal hepatic encephalopathy patients	Zuo Z	Exp Ther Med	2017	10.3892/etm.2017.5141
33293992	data not available	Effect of Sheng-Jiang Powder on Gut Microbiota in High-Fat Diet-Induced NAFLD	Li J	Evid Based Complement Alternat Med	2020	10.1155/2020/6697638
31441799	data not available	Characterisation of blood microbiota in patients with liver cirrhosis	Kajihara M	Eur J Gastroenterol Hepatol	2019	10.1097/MEG.0000000000001494
27243236	data not available	Alterations and correlations of the gut microbiome, metabolism and immunity in patients with primary biliary cirrhosis	Lv LX	Environ Microbiol	2016	10.1111/1462-2920.13401
34965368	data not available	Role of Immune Dysfunction in Acute-on-Chronic Liver Failure: From Pathogenesis to Clinical Prognosis	Huang C	Discov Med	2021
31781297	data not available	Zonulin Family Peptide Levels in Ascites and Serum in Patients with Liver Cirrhosis: A Preliminary Study	Pietrukaniec M	Dis Markers	2019	10.1155/2019/2804091
23384618	data not available	Metabolomic analyses of faeces reveals malabsorption in cirrhotic patients	Huang HJ	Dig Liver Dis	2013	10.1016/j.dld.2013.01.001
34799768	data not available	Duodenal Microbiome and Serum Metabolites Predict Hepatocellular Carcinoma in a Multicenter Cohort of Patients with Cirrhosis	Dong TS	Dig Dis Sci	2021	10.1007/s10620-021-07299-2
30428474	data not available	Long-Term Effect of Rifaximin with and without Lactulose on the Active Bacterial Assemblages in the Proximal Small Bowel and Faeces in Patients with Minimal Hepatic Encephalopathy	Schulz C	Dig Dis	2019	10.1159/000494216
26045267	data not available	Gut microbiota, cirrhosis, and alcohol regulate bile acid metabolism in the gut	Ridlon JM	Dig Dis	2015	10.1159/000371678
28983453	data not available	Remote Sensing between Liver and Intestine: Importance of Microbial Metabolites	Fu ZD	Curr Pharmacol Rep	2017	10.1007/s40495-017-0087-0
23394092	data not available	Pathophysiology of NASH: perspectives for a targeted treatment	Marra F	Curr Pharm Des	2013	10.2174/13816128113199990344
22484797	data not available	Comparison of the gut microbe profiles and numbers between patients with liver cirrhosis and healthy individuals	Liu J	Curr Microbiol	2012	10.1007/s00284-012-0105-8
30900136	data not available	Comprehensive Analysis of Serum and Fecal Bile Acid Profiles and Interaction with Gut Microbiota in Primary Biliary Cholangitis	Chen W	Clin Rev Allergy Immunol	2020	10.1007/s12016-019-08731-2
28797907	data not available	Gut microbial profile in primary biliary cholangitis: Towards bioindicators	Lemoinne S	Clin Res Hepatol Gastroenterol	2017	10.1016/j.clinre.2017.06.002
21742296	data not available	Liver fibrogenesis and metabolic factors	Anty R	Clin Res Hepatol Gastroenterol	2011	10.1016/S2210-7401(11)70003-1
32645451	data not available	Fecal Microbiota Transplantation Is Safe and Effective in Patients With Clostridioides difficile Infection and Cirrhosis	Cheng YW	Clin Gastroenterol Hepatol	2021	10.1016/j.cgh.2020.06.051
24951845	data not available	Intestinal microbiota metabolism of a prebiotic to treat hepatic encephalopathy	Floch MH	Clin Gastroenterol Hepatol	2015	10.1016/j.cgh.2014.06.008
24462627	data not available	Hepatic encephalopathy involves interactions among the microbiota, gut, brain	Victor DW 3rd	Clin Gastroenterol Hepatol	2014	10.1016/j.cgh.2014.01.022
24246768	data not available	Probiotics prevent hepatic encephalopathy in patients with cirrhosis: a randomized controlled trial	Lunia MK	Clin Gastroenterol Hepatol	2014	10.1016/j.cgh.2013.11.006
34585845	data not available	Traditional Chinese Medicine Ganshuang Granules Attenuate CCl(4) -Induced Hepatic Fibrosis by Modulating Gut Microbiota	Zhao J	Chem Biodivers	2021	10.1002/cbdv.202100520
31132339	data not available	Gut Microbiota as Biosensors in Patients With Cirrhosis	Bajaj JS	Cell Mol Gastroenterol Hepatol	2019	10.1016/j.jcmgh.2019.04.016
33657386	data not available	Proton pump inhibitor use status does not modify the microbiome signature for cirrhosis	Oh TG	Cell Metab	2021	10.1016/j.cmet.2021.02.013
33657385	data not available	Treatment regimens may compromise gut-microbiome-derived signatures for liver cirrhosis	Wu S	Cell Metab	2021	10.1016/j.cmet.2021.02.012
26867168	data not available	Alcohol Lowers Your (Intestinal) Inhibitions	Iyer N	Cell Host Microbe	2016	10.1016/j.chom.2016.01.014
31886154	data not available	Blueberry Attenuates Liver Fibrosis, Protects Intestinal Epithelial Barrier, and Maintains Gut Microbiota Homeostasis	Yan Z	Can J Gastroenterol Hepatol	2019	10.1155/2019/5236149
27356366	data not available	Le microbiote et les stéatopathies métaboliques	Buffet C	Bull Acad Natl Med	2014
29888008	data not available	Antimicrobial-Induced Cytopenia and Bone Marrow Hypocellularity in Patients with Cirrhosis	Patil A	Bone Marrow Res	2018	10.1155/2018/4029648
32685479	data not available	Gut Microbiota and Liver Fibrosis: One Potential Biomarker for Predicting Liver Fibrosis	Li Z	Biomed Res Int	2020	10.1155/2020/3905130
33407877	data not available	Analysis of sex differences in dietary copper-fructose interaction-induced alterations of gut microbial activity in relation to hepatic steatosis	Song M	Biol Sex Differ	2021	10.1186/s13293-020-00346-z
34592890	data not available	Firmicutes and Blautia in gut microbiota lessened in chronic liver diseases and hepatocellular carcinoma patients: a pilot study	Chen T	Bioengineered	2021	10.1080/21655979.2021.1982273
33331485	data not available	GUT MICROBIOTA, PREBIOTICS, PROBIOTICS, AND SYNBIOTICS IN GASTROINTESTINAL AND LIVER DISEASES: PROCEEDINGS OF A JOINT MEETING OF THE BRAZILIAN SOCIETY OF HEPATOLOGY (SBH), BRAZILIAN NUCLEUS FOR THE STUDY OF HELICOBACTER PYLORI AND MICROBIOTA (NBEHPM), AND BRAZILIAN FEDERATION OF GASTROENTEROLOGY (FBG)	Barbuti RC	Arq Gastroenterol	2020	10.1590/S0004-2803.202000000-72
32889577	data not available	Fine tuning the gut-liver-axis	Myllys M	Arch Toxicol	2020	10.1007/s00204-020-02886-0
31023615	data not available	A different gut microbiome linked to inflammation found in cirrhotic patients with and without hepatocellular carcinoma	Piñero F	Ann Hepatol	2019	10.1016/j.aohep.2018.10.003
26327313	data not available	Bile acid profiling and quantification in biofluids using ultra-performance liquid chromatography tandem mass spectrometry	Sarafian MH	Anal Chem	2015	10.1021/acs.analchem.5b01556
33084400	data not available	Liver Injury Impaired 25-Hydroxylation of Vitamin D Suppresses Intestinal Paneth Cell defensins, leading to Gut Dysbiosis and Liver Fibrogenesis	Wu P	Am J Physiol Gastrointest Liver Physiol	2020	10.1152/ajpgi.00021.2020
31460790	data not available	Posttraumatic stress disorder is associated with altered gut microbiota that modulates cognitive performance in veterans with cirrhosis	Bajaj JS	Am J Physiol Gastrointest Liver Physiol	2019	10.1152/ajpgi.00194.2019
25258407	data not available	Systems biology analysis of omeprazole therapy in cirrhosis demonstrates significant shifts in gut microbiota composition and function	Bajaj JS	Am J Physiol Gastrointest Liver Physiol	2014	10.1152/ajpgi.00268.2014
24699327	data not available	Colonic inflammation and secondary bile acids in alcoholic cirrhosis	Kakiyama G	Am J Physiol Gastrointest Liver Physiol	2014	10.1152/ajpgi.00315.2013
22821944	data not available	Colonic mucosal microbiome differs from stool microbiome in cirrhosis and hepatic encephalopathy and is linked to cognition and inflammation	Bajaj JS	Am J Physiol Gastrointest Liver Physiol	2012	10.1152/ajpgi.00152.2012
29872220	data not available	Proton Pump Inhibitor Initiation and Withdrawal affects Gut Microbiota and Readmission Risk in Cirrhosis	Bajaj JS	Am J Gastroenterol	2018	10.1038/s41395-018-0085-9
23877352	data not available	Large-scale survey of gut microbiota associated with MHE Via 16S rRNA-based pyrosequencing	Zhang Z	Am J Gastroenterol	2013	10.1038/ajg.2013.221
27868217	data not available	Chronic opioid use is associated with altered gut microbiota and predicts readmissions in patients with cirrhosis	Acharya C	Aliment Pharmacol Ther	2017	10.1111/apt.13858
28925102	data not available	Continued Alcohol Misuse in Human Cirrhosis is Associated with an Impaired Gut-Liver Axis	Bajaj JS	Alcohol Clin Exp Res	2017	10.1111/acer.13498
31849218	data not available	Evaluation of a Dual-Acting Antibacterial Agent, TNP-2092, on Gut Microbiota and Potential Application in the Treatment of Gastrointestinal and Liver Disorders	Yuan Y	ACS Infect Dis	2020	10.1021/acsinfecdis.9b00374
35070054	data not available	Critical biomarkers of hepatocellular carcinoma in body fluids and gut microbiota	Nath LR	World J Gastrointest Oncol	2021	10.4251/wjgo.v13.i12.2219
34853655	data not available	Hepatocellular carcinoma biomarkers, an imminent need	Zamora-León SP	World J Gastrointest Oncol	2021	10.4251/wjgo.v13.i11.1847
31814271	data not available	Nanoparticle Conjugation of Ginsenoside Rg3 Inhibits Hepatocellular Carcinoma Development and Metastasis	Ren Z	Small	2020	10.1002/smll.201905233
28288414	data not available	Butyrate induces ROS-mediated apoptosis by modulating miR-22/SIRT-1 pathway in hepatic cancer cells	Pant K	Redox Biol	2017	10.1016/j.redox.2017.03.006
32531627	data not available	Maternal prenatal psychological distress and hair cortisol levels associate with infant fecal microbiota composition at 2.5 months of age	Aatsinki AK	Psychoneuroendocrinology	2020	10.1016/j.psyneuen.2020.104754
34374130	data not available	Gut microbiota enhances the chemosensitivity of hepatocellular carcinoma to 5-fluorouracil in vivo by increasing curcumin bioavailability	Jin M	Phytother Res	2021	10.1002/ptr.7240
31526871	data not available	Zn(II)-curcumin solid dispersion impairs hepatocellular carcinoma growth and enhances chemotherapy by modulating gut microbiota-mediated zinc homeostasis	Wu R	Pharmacol Res	2019	10.1016/j.phrs.2019.104454
23817322	data not available	Gut microbiota: Obesity-induced microbial metabolite promotes HCC	Ray K	Nat Rev Gastroenterol Hepatol	2013	10.1038/nrgastro.2013.121
25892944	data not available	What is Obesity Doing to Your Gut?	Lee YY	Malays J Med Sci	2015
33768575	data not available	Metabolic syndrome cannot mask the changes of faecal microbiota compositions caused by primary hepatocellular carcinoma	Ni J	Lett Appl Microbiol	2021	10.1111/lam.13477
34873013	data not available	Gut microbiome is associated with the clinical response to anti-PD-1 based immunotherapy in hepatobiliary cancers	Mao J	J Immunother Cancer	2021	10.1136/jitc-2021-003334
22940407	data not available	Targeting gut flora to prevent progression of hepatocellular carcinoma	Darnaud M	J Hepatol	2013	10.1016/j.jhep.2012.08.019
34877268	data not available	Antibiotic Therapy is Associated with Worse Outcome in Patients with Hepatocellular Carcinoma Treated with Sorafenib	Pomej K	J Hepatocell Carcinoma	2021	10.2147/JHC.S317957
34336726	data not available	An Exploratory Study for the Association of Gut Microbiome with Efficacy of Immune Checkpoint Inhibitor in Patients with Hepatocellular Carcinoma	Shen YC	J Hepatocell Carcinoma	2021	10.2147/JHC.S315696
34012660	data not available	The deficiency of FKBP-5 inhibited hepatocellular progression by increasing the infiltration of distinct immune cells and inhibiting obesity-associated gut microbial metabolite	Zhang C	J Gastrointest Oncol	2021	10.21037/jgo-21-71
31218741	data not available	Urolithin B suppresses tumor growth in hepatocellular carcinoma through inducing the inactivation of Wnt/β-catenin signaling	Lv MY	J Cell Biochem	2019	10.1002/jcb.28989
23316374	data not available	Regulation of T helper 17 by bacteria: an approach for the treatment of hepatocellular carcinoma	Sung CY	Int J Hepatol	2012	10.1155/2012/439024
34028016	data not available	Association of bowel movement frequency and laxative use with risk of hepatocellular carcinoma in US women and men	Long L	Int J Cancer	2021	10.1002/ijc.33699
32509825	data not available	Gut microbiota and hepatocellular carcinoma	Wang P	Hepatobiliary Surg Nutr	2020	10.21037/hbsn.2019.10.34
31673547	data not available	Potential therapeutic strategies to target gut microbiota in hepatocellular carcinoma	Amedei A	Hepatobiliary Surg Nutr	2019	10.21037/hbsn.2019.09.04
32051207	data not available	Using dual checkpoint blockade to treat fibrolamellar hepatocellular carcinoma	De Toni EN	Gut	2020	10.1136/gutjnl-2020-320604
31852768	data not available	Meta-analysis of the efficacy and safety of PD-1/PD-L1 inhibitors administered alone or in combination with anti-VEGF agents in advanced hepatocellular carcinoma	Feng Z	Gut	2020	10.1136/gutjnl-2019-320116
31748202	data not available	Individualised tailored assessment of therapeutic alternatives for HCC patients within the Milan criteria	Zhang N	Gut	2020	10.1136/gutjnl-2019-320073
34585698	data not available	Safflower yellow reduces DEN-induced hepatocellular carcinoma by enhancing liver immune infiltration through promotion of collagen degradation and modulation of gut microbiota	Fu H	Food Funct	2021	10.1039/d1fo01321a
34648844	data not available	Insulin promotes hepatocarcinoma tumorigenesis by up-regulating PKM2 expression	Liu J	Exp Cell Res	2021	10.1016/j.yexcr.2021.112872
32864300	data not available	Dietary Additives and Supplements Revisited: The Fewer, the Safer for Liver and Gut Health	Golonka R	Curr Pharmacol Rep	2019	10.1007/s40495-019-00187-4
25345506	data not available	Implication of gut microbiota in human health	Khan I	CNS Neurol Disord Drug Targets	2014	10.2174/1871527313666141023153506
30586712	data not available	Loss of Gut Microbiota Alters Immune System Composition and Cripples Postinfarction Cardiac Repair	Tang TWH	Circulation	2019	10.1161/CIRCULATIONAHA.118.035235
28600122	data not available	Oxidative stress plays a key role in butyrate-mediated autophagy via Akt/mTOR pathway in hepatoma cells	Pant K	Chem Biol Interact	2017	10.1016/j.cbi.2017.06.001
30403986	data not available	When Soluble Fibers Meet Hepatocellular Carcinoma: The Dark Side of Fermentation	Gallage S	Cell Metab	2018	10.1016/j.cmet.2018.10.009
33839491	data not available	Probiotics-rich emulsion improves insulin signalling in Palmitate/Oleate-challenged human hepatocarcinoma cells through the modulation of Fetuin-A/TLR4-JNK-NF-κB pathway	Mularczyk M	Biomed Pharmacother	2021	10.1016/j.biopha.2021.111560
32014907	data not available	Relationship Between Adverse Events and Microbiomes in Advanced Hepatocellular Carcinoma Patients Treated With Sorafenib	Yamamoto K	Anticancer Res	2020	10.21873/anticanres.13996
22567183	alcoholic liver disease	Bacterial translocation and changes in the intestinal microbiome associated with alcoholic liver disease	Yan AW	World J Hepatol	2012	10.4254/wjh.v4.i4.110
33672887	alcoholic liver disease	Fungi-Bacteria Correlation in Alcoholic Hepatitis Patients	Gao B	Toxins (Basel)	2021	10.3390/toxins13020143
29555983	alcoholic liver disease	Characterization of intestinal microbiota in alcoholic patients with and without alcoholic hepatitis or chronic alcoholic pancreatitis	Ciocan D	Sci Rep	2018	10.1038/s41598-018-23146-3
33443222	alcoholic liver disease	Oral administration of PEGylated TLR7 ligand ameliorates alcohol-associated liver disease via the induction of IL-22	Wang Q	Proc Natl Acad Sci U S A	2021	10.1073/pnas.2020868118
31723265	alcoholic liver disease	Bacteriophage targeting of gut bacterium attenuates alcoholic liver disease	Duan Y	Nature	2019	10.1038/s41586-019-1742-x
31784706	alcoholic liver disease	Manipulating the gut microbiota to combat alcoholic hepatitis	Ray K	Nat Rev Gastroenterol Hepatol	2020	10.1038/s41575-019-0246-3
30643227	alcoholic liver disease	Alcohol, liver disease and the gut microbiota	Bajaj JS	Nat Rev Gastroenterol Hepatol	2019	10.1038/s41575-018-0099-1
33598648	alcoholic liver disease	Gut dysbiosis as a driver in alcohol-induced liver injury	Fairfield B	JHEP Rep	2020	10.1016/j.jhepr.2020.100220
31606552	alcoholic liver disease	The Candida albicans exotoxin candidalysin promotes alcohol-associated liver disease	Chu H	J Hepatol	2020	10.1016/j.jhep.2019.09.029
30470480	alcoholic liver disease	Only in the darkness can you see the stars: Severe alcoholic hepatitis and higher grades of acute-on-chronic liver failure	Philips CA	J Hepatol	2019	10.1016/j.jhep.2018.10.004
29803899	alcoholic liver disease	Intestinal HIF-1α deletion exacerbates alcoholic liver disease by inducing intestinal dysbiosis and barrier dysfunction	Shao T	J Hepatol	2018	10.1016/j.jhep.2018.05.021
27890791	alcoholic liver disease	Fecal microbiota manipulation prevents dysbiosis and alcohol-induced liver injury in mice	Ferrere G	J Hepatol	2017	10.1016/j.jhep.2016.11.008
31889749	alcoholic liver disease	Gut Microbiota in Alcoholic Hepatitis is Disparate from Those in Acute Alcoholic Pancreatitis and Biliary Disease	Philips CA	J Clin Exp Hepatol	2019	10.1016/j.jceh.2019.04.001
29931479	alcoholic liver disease	Corticosteroids, nutrition, pentoxifylline, or fecal microbiota transplantation for severe alcoholic hepatitis	Philips CA	Indian J Gastroenterol	2018	10.1007/s12664-018-0859-4
32654263	alcoholic liver disease	Intestinal Virome in Patients With Alcoholic Hepatitis	Jiang L	Hepatology	2020	10.1002/hep.31459
32198889	alcoholic liver disease	Is It Time to Consider Gut Microbiome Readouts for Precision Diagnosis and Treatment of Alcoholic Liver Disease?	Cresci GAM	Hepatology	2020	10.1002/hep.31245
32056227	alcoholic liver disease	Fecal Microbiome Distinguishes Alcohol Consumption From Alcoholic Hepatitis But Does Not Discriminate Disease Severity	Smirnova E	Hepatology	2020	10.1002/hep.31178
31228214	alcoholic liver disease	Intestinal Fungal Dysbiosis and Systemic Immune Response to Fungi in Patients With Alcoholic Hepatitis	Lang S	Hepatology	2020	10.1002/hep.30832
29083504	alcoholic liver disease	The circulating microbiome signature and inferred functional metagenomics in alcoholic hepatitis	Puri P	Hepatology	2018	10.1002/hep.29623
29083499	alcoholic liver disease	Circulating bugs in blood in alcoholic liver disease!	Perlemuter G	Hepatology	2018	10.1002/hep.29624
32766476	alcoholic liver disease	Functional Microbiomics Reveals Alterations of the Gut Microbiome and Host Co-Metabolism in Patients With Alcoholic Hepatitis	Gao B	Hepatol Commun	2020	10.1002/hep4.1537
32684075	alcoholic liver disease	Changes in the fecal bacterial microbiota associated with disease severity in alcoholic hepatitis patients	Lang S	Gut Microbes	2020	10.1080/19490976.2020.1785251
32588725	alcoholic liver disease	Intestinal permeability, microbial translocation, changes in duodenal and fecal microbiota, and their associations with alcoholic liver disease progression in humans	Maccioni L	Gut Microbes	2020	10.1080/19490976.2020.1782157
33004548	alcoholic liver disease	Microbiota tryptophan metabolism induces aryl hydrocarbon receptor activation and improves alcohol-induced liver injury	Wrzosek L	Gut	2021	10.1136/gutjnl-2020-321565
29097439	alcoholic liver disease	Mucosa-associated invariant T cells link intestinal immunity with antibacterial immune defects in alcoholic liver disease	Riva A	Gut	2018	10.1136/gutjnl-2017-314458
26642859	alcoholic liver disease	Intestinal microbiota contributes to individual susceptibility to alcoholic liver disease	Llopis M	Gut	2016	10.1136/gutjnl-2015-310585
34035720	alcoholic liver disease	Current Management and Future Treatment of Alcoholic Hepatitis	Mitchell MC	Gastroenterol Hepatol (N Y)	2020
26302024	alcoholic liver disease	Effects of probiotics (cultured Lactobacillus subtilis/Streptococcus faecium) in the treatment of alcoholic hepatitis: randomized-controlled multicenter study	Han SH	Eur J Gastroenterol Hepatol	2015	10.1097/MEG.0000000000000458
33566559	alcoholic liver disease	No Effect in Alcoholic Hepatitis of Gut-Selective, Broad-Spectrum Antibiotics on Bacterial Translocation or Hepatic and Systemic Inflammation	Støy S	Clin Transl Gastroenterol	2021	10.14309/ctg.0000000000000306
32570299	alcoholic liver disease	Fecal microbiota transplantation in alcohol related liver diseases	Shasthry SM	Clin Mol Hepatol	2020	10.3350/cmh.2020.0057
31978341	alcoholic liver disease	Bacteriophage Prevents Alcoholic Liver Disease	Çolakoğlu M	Cell	2020	10.1016/j.cell.2019.12.034
34691793	alcoholic liver disease	Veillonella Bacteremia in Alcoholic Hepatitis	Lee P	Case Reports Hepatol	2021	10.1155/2021/9947213
33381475	alcoholic liver disease	Regulating Intestinal Microbiota in the Prevention and Treatment of Alcohol-Related Liver Disease	Chi X	Can J Gastroenterol Hepatol	2020	10.1155/2020/6629196
29122905	alcoholic liver disease	Healthy donor faecal transplant for corticosteroid non-responsive severe alcoholic hepatitis	Philips CA	BMJ Case Rep	2017	10.1136/bcr-2017-222310
33264437	alcoholic liver disease	Microbiome as a potential diagnostic and predictive biomarker in severe alcoholic hepatitis	Kim SS	Aliment Pharmacol Ther	2021	10.1111/apt.16200
30144108	alcoholic liver disease	Bile acid homeostasis and intestinal dysbiosis in alcoholic hepatitis	Ciocan D	Aliment Pharmacol Ther	2018	10.1111/apt.14949
29482588	alcoholic liver disease	Antifibrotic and molecular aspects of rifaximin in alcoholic liver disease: study protocol for a randomized controlled trial	Madsen BS	Trials	2018	10.1186/s13063-018-2523-9
26978420	alcoholic liver disease	[Specific features of the enteric microbiota composition in patients with alcoholic liver cirrhosis]	Shalikiani NV	Ter Arkh	2015	10.17116/terarkh2015871259-65
29687200	alcoholic liver disease	Are Probiotics Effective in Targeting Alcoholic Liver Diseases?	Hong M	Probiotics Antimicrob Proteins	2019	10.1007/s12602-018-9419-6
34068838	alcoholic liver disease	Markers of Intestinal Permeability Are Rapidly Improved by Alcohol Withdrawal in Patients with Alcohol-Related Liver Disease	Jung F	Nutrients	2021	10.3390/nu13051659
29038503	alcoholic liver disease	Gastric acid suppression promotes alcoholic liver disease by inducing overgrowth of intestinal Enterococcus	Llorente C	Nat Commun	2017	10.1038/s41467-017-00796-x
29041989	alcoholic liver disease	Links of gut microbiota composition with alcohol dependence syndrome and alcoholic liver disease	Dubinkina VB	Microbiome	2017	10.1186/s40168-017-0359-2
31951082	alcoholic liver disease	Gut microbiota compositional and functional fingerprint in patients with alcohol use disorder and alcohol-associated liver disease	Addolorato G	Liver Int	2020	10.1111/liv.14383
28530644	alcoholic liver disease	Intestinal fungi contribute to development of alcoholic liver disease	Yang AM	J Clin Invest	2017	10.1172/JCI90562
32582865	alcoholic liver disease	The mechanism of dysbiosis in alcoholic liver disease leading to liver cancer	Méndez-Sánchez N	Hepatoma Res	2020	10.20517/2394-5079.2019.29
33816353	alcoholic liver disease	Streptococcus, the Predominant Bacterium to Predict the Severity of Liver Injury in Alcoholic Liver Disease	Zhong X	Front Cell Infect Microbiol	2021	10.3389/fcimb.2021.649060
31431085	alcoholic liver disease	Attenuated fibrosis in specific pathogen-free microbiota in experimental cholestasis- and toxin-induced liver injury	Moghadamrad S	FASEB J	2019	10.1096/fj.201901113R
28138508	alcoholic liver disease	Data on gut metagenomes of the patients with alcoholic dependence syndrome and alcoholic liver cirrhosis	Tyakht AV	Data Brief	2017	10.1016/j.dib.2017.01.008
24564202	alcoholic liver disease	Changes in gut bacterial populations and their translocation into liver and ascites in alcoholic liver cirrhotics	Tuomisto S	BMC Gastroenterol	2014	10.1186/1471-230X-14-40

## Sheet: SRA
Bioproject Acession	ID	Included or excluded	Introduction
PRJNA690835	690835	alcoholic liver disease	the imbalance of gut microbiota in alcoholic liver disease (ALD) patients
PRJEB20486	383517	fatty liver disease	Steatohepatitis progresses to cancer via immunosuppression of HCC directed by CD8+Tcells
PRJEB28350	487878	fatty liver disease	Gut microbiome signature for cirrhosis due to nonalcoholic fatty liver disease: a prospective Twin and Family Study
PRJNA647523	647523	fatty liver disease	Impact of the gut microbiome and metabolome on the peripheral immune response in non-alcoholic fatty liver disease related hepatocellular carcinoma
PRJEB40538	746841	fatty liver disease	MAST4HEALTH study
PRJEB32568	575437	included	Compositional and functional alterations of intestinal microbiota in different clinical settings of chronic hepatitis B virus infection
PRJNA382861	382861	included_PMID29180991	human gut metagenome Raw sequence reads
PRJNA445763	445763	included_PMID29780327	Small bowel transit and altered gut microbiota in patients with liver cirrhosis
PRJNA428932	428932	included_PMID30675188	Gut microbiota analysis associated with hepatocellular carcinoma
PRJNA478823	478823	included_PMID31293562	Study the changes of feces microbiota of patients with HCC.
PRJNA558158	558158	included_PMID32265857	Gut microbiota of HBV-related disease progression
PRJNA373920	373920	no metadata	feces sample Raw sequence reads
PRJNA773412	773412	no metadata	On the Relationship between Liver Function Injury and Intestinal Microflora Structural Changes after Resection of Primary Liver Cancer
PRJNA431746	431746	no metadata_PMID32585997	Intestinal Microbiome Compostition in liver cirrhosis patients undergoing probiotic intervention
PRJEB8708	283045	no metadata_PMID33225985	The prognosis for HCC is very poor, mainly because early diagnosis was often not feasible. Serum AFP as a diagnostic tool for early HCC has significant limitations. Intestinal microbial variation is closely associated with liver injury and chronic inflammatory, and ultimately promotes HCC development by intestinal microbiota-liver axis. This study was the first to identify intestinal microbial ch…
PRJNA293255	293255	non-human	Metagenomic study of the effect of probiotics on hepatocellular tumor growth in mice
PRJNA341592	341592	non-human	Kap1 in liver physiology
PRJNA448565	448565	non-human	Sequential changes in the mesenteric lymph node microbiome and immune response during cirrhosis induction in rats
PRJNA488067	488067	non-human	Effects of fructose on liver gene expression profile in DEN-induced HCC model.
PRJNA490764	490764	non-human	Animal model of acute-on-chronic alcoholic liver injury [DDC study]
PRJEB28449	497554	non-human	Dysregulated Microbial Fermentation of Soluble Fiber Induces Cholestatic Liver Cancer
PRJNA512063	512063	non-human	HBV infection alters the compostion of gut microbiota
PRJNA523534	523534	non-human	Zn(II)-curcumin solid dispersions inhibit hepatocellular carcinoma growth and act as a chemosensitizer by modulating gut microbiota-mediated zinc homeostasis
PRJEB33251	572881	non-human	Prospective Cohort Assessing the Role of the Genotoxin Colibactin From Escherichia Coli B2 in the Genesis of NASH (Coli-NASH)
PRJNA579967	579967	non-human	Lactic acid enhances cadmium to promote the progression of hepatocellular carcinoma
PRJNA591723	591723	non-human	Rattus norvegicus cultivar:Sprague Dawley Raw sequence reads
PRJNA648423	648423	non-human	Imbalanced gut microbiota fuels HCC development by shaping the hepatic inflammatory microenvironment
PRJNA678005	678005	non-human	The gut microbiota dysbiosis plays an important role in various diseases of the host, such as obesity, diabetes, inflammatory bowel disease, autoimmune diseases, acute severe pancreatitis, hepatitis, liver cirrhosis, tumors and many other pathological states. There have been lots of studies focus on the gut microbiota changes in liver cirrhosis. With increasing understanding of the relationship b…
PRJNA735706	735706	non-human	Hepatic Branch Vagotomy Modulates the Gut-Liver-Brain Axis in Murine Cirrhosis
PRJEB47889	780857	non-human	NKT cell- NASH murine model - Microbiome: study 1
PRJEB6337	252687	not 16S rRNA	Liver cirrhosis occurs as a consequence of many chronic liver diseases that are prevalent worldwide. Previous studies have shown an association between the gut microbiota and liver complications such as cirrhosis and other liver injuries. We therefore undertook a whole gut microbiome wide association study of stool samples from 98 liver cirrhosis patients and 83 healthy controls to characterise t…
PRJNA534155	534155	not 16S rRNA	fecal microbiota Metagenome
PRJEB40200	668506	not 16S rRNA	Characteristics of mouse intestinal microbiota during acute liver injury following 50% partial hepatectomy
PRJEB15501	398752	other diseases	Bile microbiota in primary sclerosing cholangitis: Impact on disease progression and development of biliary dysplasia
PRJEB21528	422557	other diseases	Here we performed a metagenome-wide association study (MWAS) on stools from 218 individuals with atherosclerotic cardiovascular disease (ACVD) and 187 healthy controls.
PRJDB5420	478155	other hepatitis virus	Microbiota of patients infected with HCV
